# Supplementary material for: The electronic effects of ligands on metal-coordination geometry: a key role in the visual discrimination of dimethylaminopyridine and its application towards chemo-switch
Source: Royal Society of Chemistry journal article supplement (doi:10.1039/c5cc00196j), 2015-01-01
Supplement: c5cc00196j1.pdf [file c5cc00196j1.pdf]

*Electronic Supplementary Material (ESI) for*

**The Electronic Effects of Ligands on Metal-Coordination Geometry: A  
Key Role in the Visual Discrimination of Dimethylaminopyridine and its  
Application towards Chemo-switch**

Weiwei Fang,<sup>a</sup> Cong Liu,<sup>a,b</sup> Jiangbo Chen,<sup>a</sup> Zhengwei Lu,<sup>a</sup> Zhi-Ming Li,<sup>\*a</sup> Xiaoling Bao<sup>c</sup>  
and Tao Tu<sup>\*a,b</sup>

<sup>a</sup> Department of Chemistry, Fudan University, 220 Handan Road, Shanghai, 200433, China,  
E-mail: taotu@fudan.edu.cn.

<sup>b</sup> Stake Key Laboratory of Organometallic Chemistry, Shanghai Institute of Organic  
Chemistry, Chinese Academy of Sciences, Shanghai, 200032, China.

<sup>c</sup> Institute of Quality Inspection of Food and Cosmetics, Shanghai Institute of Quality  
Inspection and Technical Research, 381 Cangwu Road, Shanghai, 200233, China.

## Table of Contents:

|    |                                                                                                                    |     |
|----|--------------------------------------------------------------------------------------------------------------------|-----|
| 1  | General                                                                                                            | S3  |
| 2  | Experimental techniques                                                                                            | S3  |
|    | 2.1 Gelation                                                                                                       | S3  |
|    | 2.2 Scanning electron microscopy (SEM)                                                                             | S3  |
|    | 2.3 Transmission electron microscopy (TEM)                                                                         | S3  |
|    | 2.4 Single-crystal X-ray structure determination                                                                   | S4  |
| 3  | Synthesis of Cu(II)-terpyridine complex <b>1-5</b>                                                                 | S4  |
| 4  | Synthesis of Cu(II)-terpyridine complex <b>10</b>                                                                  | S6  |
| 5  | Visual recognition of <i>p</i> -DMAP from various pyridine derivatives via selective metallogel <b>1a</b> collapse | S6  |
| 6  | Crystal growth in situ from the collapsed sol formed by metallogel <b>1a</b> with <i>p</i> -DMAP                   | S7  |
| 7  | The effect of mole ratio of <i>p</i> -DMAP to Cu(II)-terpyridine complex <b>1a</b> to metallogel collapse          | S7  |
| 8  | Visual recognition of <i>p</i> -DMAP from its positional isomers via selective metallogel <b>1a</b> collapse       | S7  |
| 9  | The coordination of <i>p</i> -DMAP towards Cu(II)-terpyridine complexes                                            | S8  |
| 10 | Hydrogels and collapsed sol formed by metallogel <b>1a</b> with <i>p</i> -substituted pyridines                    | S8  |
| 11 | Crystal structure of Cu(II)-terpyridine complex <b>6a</b>                                                          | S9  |
| 12 | Crystal structure of Cu(II)-terpyridine complex <b>7</b>                                                           | S17 |
| 13 | Crystal structure of Cu(II)-terpyridine complex <b>8</b>                                                           | S26 |
| 14 | Crystal structure of Cu(II)-terpyridine complex <b>10</b>                                                          | S38 |
| 15 | Density functional theory (DFT) calculations                                                                       | S45 |
| 16 | <i>pK<sub>a</sub></i> value of pyridine derivatives                                                                | S51 |
| 17 | UV/Vis spectra                                                                                                     | S52 |
| 18 | SEM images of collapsed sols and hydrogels formed by metallogel <b>1a</b> with 4-R-pyridines                       | S53 |
| 19 | SEM images of collapsed sol and hydrogels formed by metallogel <b>1a</b> with DMAP positional isomers              | S56 |
| 20 | Reversible gel-to-sol phase transition of metallogel <b>1a</b> controlled by adding <i>p</i> -DMAP and TFA         | S58 |
| 21 | <sup>1</sup> H NMR studies of <i>p</i> -DMAP without and with TFA                                                  | S58 |
| 22 | TEM images of metallo-hydrogel reformed by collapsed sol containing <i>p</i> -DMAP after adding TFA                | S59 |
| 23 | SEM images of gel-to-sol phase transition of metallogel <b>1a</b> controlled by adding <i>p</i> -DMAP and TFA      | S60 |
| 24 | <sup>1</sup> H NMR, and ESI-MS spectra for various important compounds                                             | S64 |
| 25 | References                                                                                                         | S70 |

## **1. General.**

All commercial reagents and solvents were used directly without further purification.  $^1\text{H}$  and  $^{13}\text{C}$  NMR were recorded on Jeol ECA-400 and Bruker 500 DRX spectrometers. ESI-MS spectra were recorded on a Bruker micrOTOF II instrument. Scanning electron microscopy (SEM) experiments were carried out on a Philips XL30 microscope operated at 20 kV. Transmission electron microscopy (TEM) experiments were carried out on a JEOL JEM-2010 transmission electron microscope. UV-Vis absorption was recorded on a UV-Vis 2550 spectroscope (Shimadzu). All reactions were carried out under air unless otherwise noted. Cu(II)-terpyridine complexes **1**, **2** were synthesized according to our previous procedure.<sup>S1</sup>

## **2. Experimental techniques.**

### **2.1. Gelation test.**

For the preparation of the metallo gel samples, the solvents were used as purchased. For 1 wt% gel: 5 mg Cu(II)-terpyridine complex was filled into a screw-cap tube and then solvent (0.5 mL) was added by syringe. The exact concentration was determined by differential weighting. The Cu(II)-terpyridine complex was dissolved by heating with a heat-gun or continuous shaking. Then, the samples were allowed to cool down slowly or rest at room temperature to form a gel.

### **2.2. Scanning electron microscopy (SEM).**

SEM experiments were carried out on a Philips XL30 microscope operated at 20 kV. All pictures were taken digitally. For preparation of the samples, a silicon sheet was placed on the surface of the gel for a short time. The gel samples were partly destroyed by knocking the test tube on the table to provide a “print” of the inner volume of the gel.

### **2.3. Transmission electron microscopy (TEM).**

Transmission electron microscopy (TEM) experiments were carried out on a JEOL JEM-2010 transmission

electron microscope. All pictures were taken digitally. For preparation of the samples, carbon-coated copper grids (mesh 200 or 150) were placed on the surface of the gels for a short time. The gel samples were partly destroyed by knocking the test tube on the table to provide a “print” of the inner volume of the gel.

## 2.4. Single-crystal X-ray structure determination.

Crystal structure determination of complexes **6a**, **7-8**, **10** was performed on a Bruker Smart APEX diffractometer equipped with a normal focus, 2.4 kW sealed tube X-ray source (Mo K $\alpha$  radiation,  $\lambda = 0.71073 \text{ \AA}$ ) operating at 50 kV and 30 mA at 293 K. A hemisphere of intensity data was collected at room temperature with a scan width of  $0.60^\circ$  in  $\omega$ . Empirical absorption corrections were based on SADABS program.<sup>S2</sup> The structures were solved by direct methods and refined by full-matrix least-squares refinement using the SHELXTL-97 program.<sup>S3</sup> The positions of all non-hydrogen atoms were refined with anisotropic displacement factors.

## 3. Synthesis of Cu(II)-terpyridine complexes 1-5.

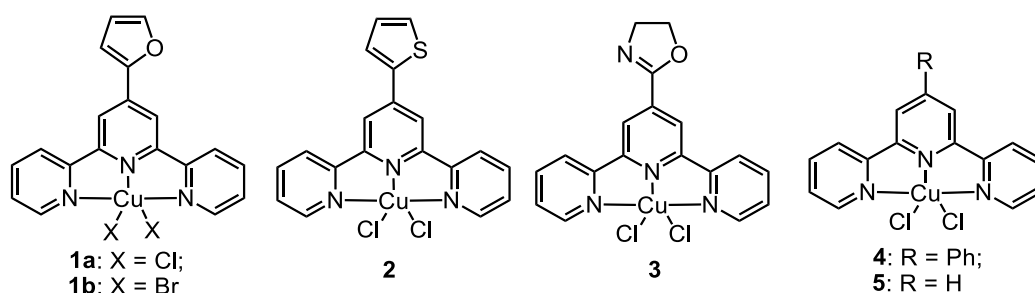

**Scheme S1.** Chemical structure of Cu(II)-terpyridine complexes **1-5**.

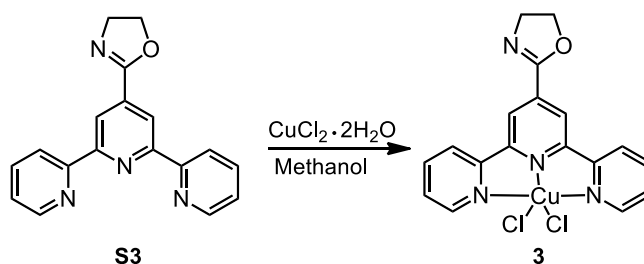

**Scheme S2.** Synthesis of Cu(II)-terpyridine complex **3**.

**4'-(2-oxazoliny)-2,2':6',2''-terpyridine (S3)** was prepared according to literature procedure.<sup>S4</sup>  $^1\text{H}$  NMR ( $\text{CDCl}_3$ , 400 MHz, 298 K):  $\delta = 8.95$  (s, 2H), 8.76-8.66 (m, 2H), 8.6 (d,  $J = 7.2$  Hz, 2H), 7.85 (t,  $J = 6.8$  Hz, 2H), 7.34 (t,  $J = 7.2$  Hz, 2H), 4.51 (t,  $J = 9.2$  Hz, 2H), 4.15 (t,  $J = 9.2$  Hz, 2H);  $^{13}\text{C}$  NMR ( $\text{CDCl}_3$ , 100 MHz, 298 K):  $\delta = 163.36$ , 156.07; 155.47, 149.17, 137.11, 136.68, 124.03, 123.88, 121.15, 121.04, 119.37, 67.85, 55.15; HR-MS (ESI):  $m/z$

303.1246 (Calcd.  $[M+H]^+$ ), 303.1247 (Found.  $[M+H]^+$ ).

**Cu(II)-terpyridine complex 3:** Ligand **S3** (151 mg, 0.5 mmol) and  $\text{CuCl}_2 \cdot 2\text{H}_2\text{O}$  (102 mg, 0.6 mmol) were dissolved in  $\text{CH}_3\text{OH}$  (10 mL). The mixture was further stirred for 24h at r.t.. The green precipitate was collected after filtration, and washed with  $\text{CH}_3\text{OH}$  ( $3 \times 30$  mL). Complex **3** was obtained as a green solid after drying under vacuum (4.31 g, 99%). HR-MS (ESI):  $m/z$  400.0152 (Calcd.  $[M-\text{Cl}]^+$ ), 400.0157 (Found.  $[M-\text{Cl}]^+$ ). Due to the poor solubility and paramagnetic property of complex **3**, it is hard to get satisfactory NMR spectra.

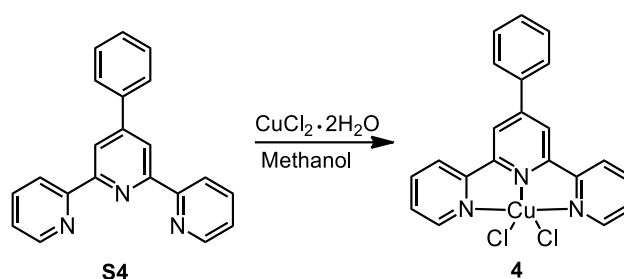

**Scheme S3.** Synthesis of Cu(II)-terpyridine complex **4**.

**4'-Phenyl-2,2':6',2''-terpyridine (S4)** was prepared according to literature procedure.<sup>S5</sup>  $^1\text{H}$  NMR ( $\text{CDCl}_3$ , 400 MHz, 298 K):  $\delta$  = 8.75-8.73 (m, 4H), 8.68 (d,  $J$  = 8.0 Hz, 2H), 7.92-7.86 (m, 4H), 7.52 (t,  $J$  = 7.2 Hz, 2H), 7.45 (t,  $J$  = 7.2 Hz, 2H), 7.37-7.34 (m, 2H); HR-MS (ESI):  $m/z$  310.1344 (Calcd.  $[M+H]^+$ ), 310.1347 (Found.  $[M+H]^+$ ).

**Cu(II)-terpyridine complex 4:** A similar synthetic procedure for complex **3** was applied, complex **4** was provided as a green solid (354 mg, 81%). HR-MS (ESI):  $m/z$  407.0251 (Calcd.  $[M-\text{Cl}]^+$ ), 407.0263 (Found.  $[M-\text{Cl}]^+$ ). Due to the poor solubility and paramagnetic property of complex **4**, it is hard to get satisfactory NMR spectra.

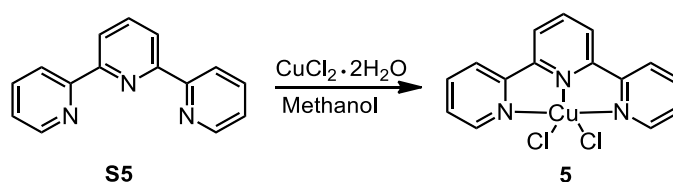

**Scheme S4.** Synthesis of Cu(II)-terpyridine complex **5**.

**Cu(II)-terpyridine complex 5:** A similar synthetic protocol for complex **3** was applied, complex **5** was provided as a green solid (255 mg, 69%). HR-MS (ESI):  $m/z$  330.9938 (Calcd.  $[M-\text{Cl}]^+$ ), 330.9923 (Found.  $[M-\text{Cl}]^+$ ). Due to the poor solubility and paramagnetic property of complex **5**, it is hard to get satisfactory NMR spectra.

#### 4. Synthesis of Cu(II)-terpyridine complex 10

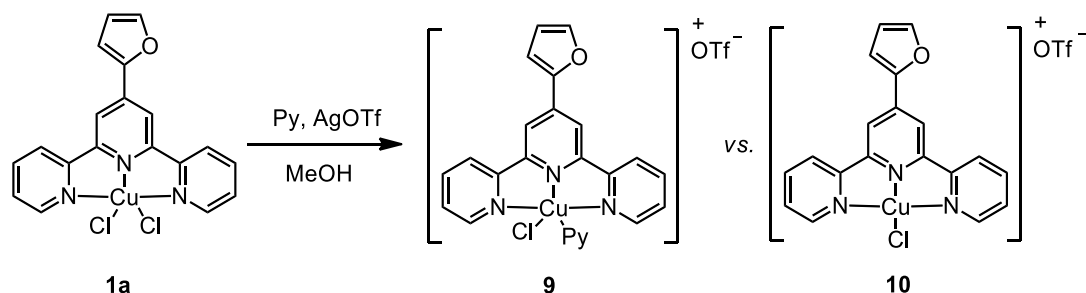

**Scheme S5.** Chemical structures of Cu(II)-terpyridine complexes **9** and **10**.

**Cu(II)-terpyridine complex 10:** complex **1a** (219 mg, 0.5 mmol), pyridine (79 mg, 1.0 mmol) and AgOTf (129 mg, 0.5 mmol) were added to MeOH (20 mL) and stirred at r.t. for 24 h under N<sub>2</sub> in darkness. The white AgCl was filtrated away through a short pad of Celite covered with a pad of MgSO<sub>4</sub>, washed with CH<sub>3</sub>OH (3 × 30 mL) and then the filtrate was dried under vacuum to give complex **10** as a blue-green solid (345 mg, 99%). HR-MS (ESI): *m/z* 181.0178 (Calcd. [M-Cl-OTf]<sup>2+</sup>), 181.0195 (Found. [M-Cl-OTf]<sup>2+</sup>).

#### 5. Visual recognition of *p*-DMAP from various pyridine derivatives via selective metallo gel **1a** collapse.

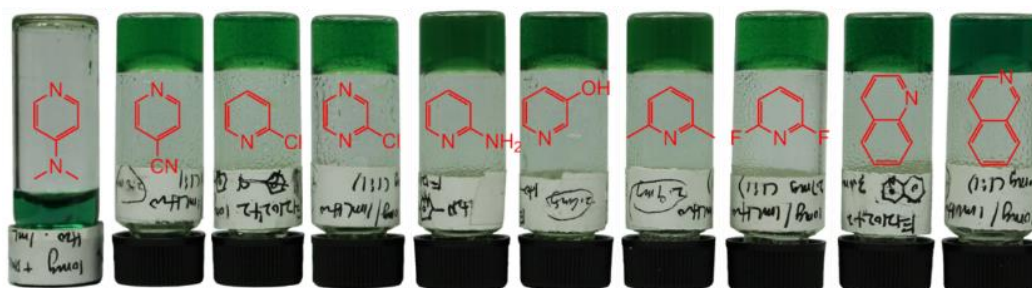

**Figure S1.** Collapsed sol and hydrogels formed by metallo gel **1a**/H<sub>2</sub>O (1.0 wt%) with various additional pyridine derivatives.

6. Crystal growth in situ from the collapsed sol formed by metallo-hydrogel with *p*-DMAP.

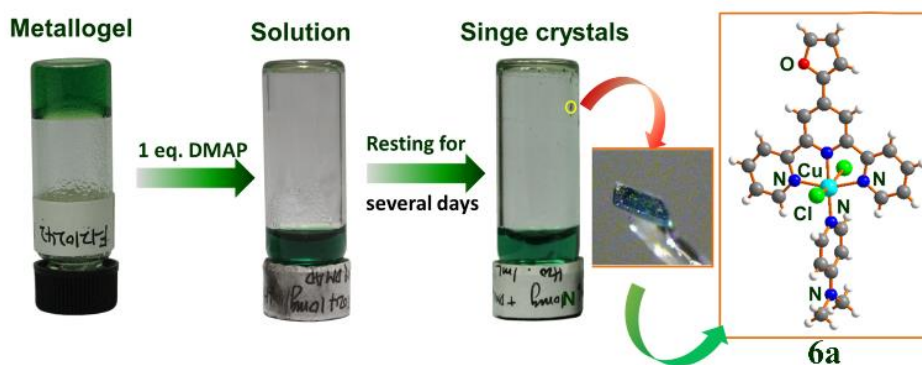

Figure S2. Crystal growth in situ from collapsed sol formed by metallo-hydrogel **1a** (1 wt%) with 1 equiv. *p*-DMAP.

7. The effect of mole ratio of *p*-DMAP to Cu(II)-terpyridine complex **1a** to metallo-gel collapse.

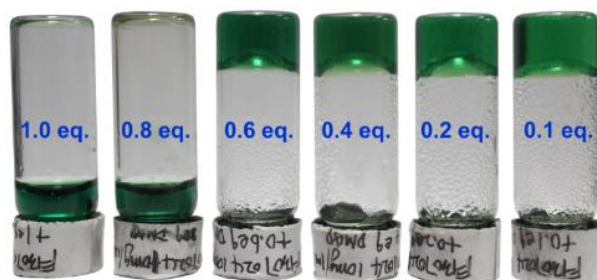

Figure S3. The correlation of mole ratio of *p*-DMAP to Cu(II)-terpyridine complex **1a** leading metallo-gel collapse.

8. Visual recognition of *p*-DMAP from its positional isomers via selective metallo-gel **1a** collapse.

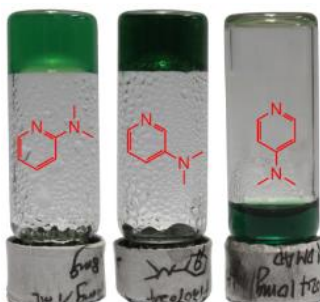

**Figure S4.** Collapsed sol and hydrogels formed by metallo-hydrogel **1a** (1 wt%) with *o*-, *m*- and *p*-DMAP.

### 9. The coordination of *p*-DMAP towards Cu(II)-terpyridine complexes.

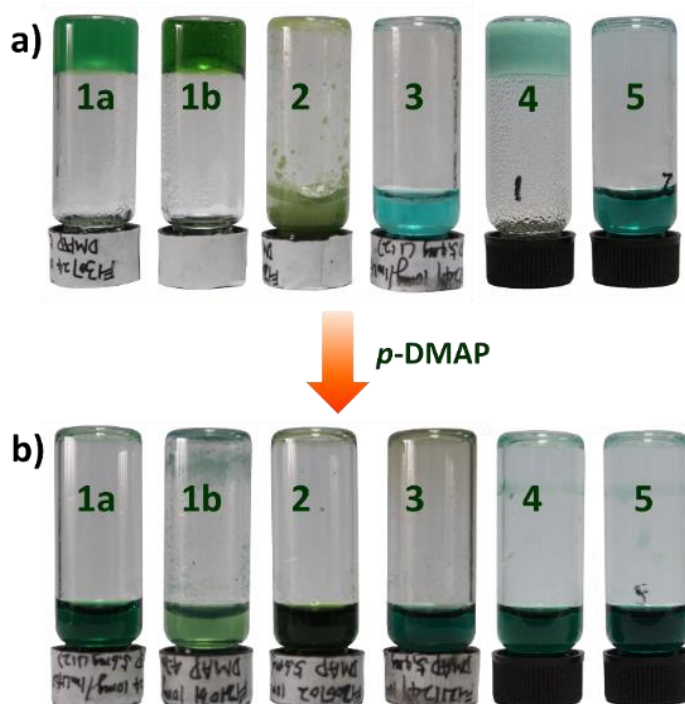

**Figure S5.** a) Gelation test of complexes 1-5 in water, and b) the resulted solutions formed by the samples after gelation test with additional 1 equiv. *p*-DMAP.

### 10. Hydrogels and collapsed sol formed by metalloel **1a** with *p*-substituted pyridines.

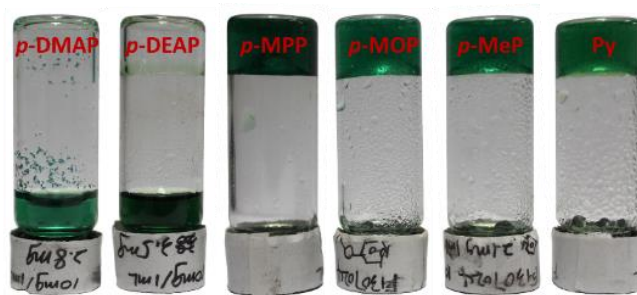

**Figure S6.** Metallo-hydrogels and solutions formed by metalloel **1a** after the addition of 1 equiv. 4-substituted pyridines: *p*-DMAP, *p*-DEAP, *p*-MPP, *p*-MOP, *p*-MeP and Py.



## 11. Crystal structure of Cu(II)-terpyridine complex **6a**

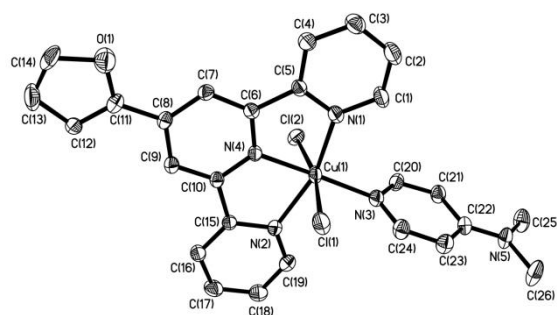

*Figure S7.* Molecular structure of complex **6a**.

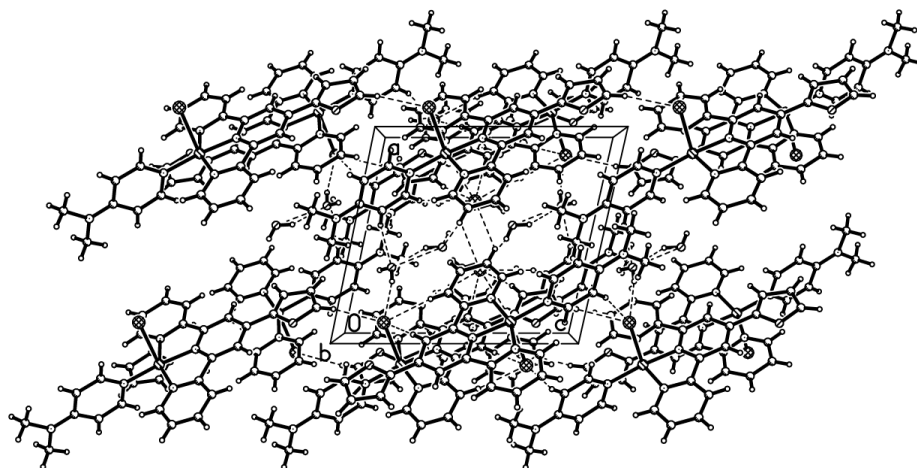

*Figure S8.* Cell unit formed by complex **6a**.

*Table S1.* Crystal data and structure refinement for complex **6a**.

|                     |                                                                                  |
|---------------------|----------------------------------------------------------------------------------|
| Identification code | complex <b>6a</b>                                                                |
| Empirical formula   | C <sub>26</sub> H <sub>27</sub> Cl <sub>2</sub> Cu N <sub>5</sub> O <sub>3</sub> |
| Formula weight      | 591.97                                                                           |
| Temperature         | 293(2) K                                                                         |
| Wavelength          | 0.71073 Å                                                                        |

|                                   |                                                                                                                                    |
|-----------------------------------|------------------------------------------------------------------------------------------------------------------------------------|
| Crystal system, space group       | Triclinic, P-1                                                                                                                     |
| Unit cell dimensions              | a = 10.671(8) Å    alpha = 89.450(9) deg.<br>b = 11.025(8) Å    beta = 77.812(9) deg.<br>c = 11.868(8) Å    gamma = 79.520(9) deg. |
| Volume                            | 1341.3(16) Å <sup>3</sup>                                                                                                          |
| Z, Calculated density             | 2, 1.466 Mg/m <sup>3</sup>                                                                                                         |
| Absorption coefficient            | 1.051 mm <sup>-1</sup>                                                                                                             |
| F(000)                            | 610                                                                                                                                |
| Crystal size                      | 0.15 x 0.13 x 0.10 mm                                                                                                              |
| Theta range for data collection   | 1.99 to 25.02 deg.                                                                                                                 |
| Limiting indices                  | -11<=h<=12, -10<=k<=13, -13<=l<=14                                                                                                 |
| Reflections collected / unique    | 5542 / 4609 [R(int) = 0.0982]                                                                                                      |
| Completeness to theta = 25.02     | 97.5 %                                                                                                                             |
| Absorption correction             | Semi-empirical from equivalents                                                                                                    |
| Max. and min. transmission        | 0.9022 and 0.8583                                                                                                                  |
| Refinement method                 | Full-matrix least-squares on F <sup>2</sup>                                                                                        |
| Data / restraints / parameters    | 4609 / 0 / 334                                                                                                                     |
| Goodness-of-fit on F <sup>2</sup> | 1.013                                                                                                                              |
| Final R indices [I>2sigma(I)]     | R1 = 0.0584, wR2 = 0.1709                                                                                                          |
| R indices (all data)              | R1 = 0.0773, wR2 = 0.1815                                                                                                          |
| Largest diff. peak and hole       | 1.330 and -0.571 e.Å <sup>-3</sup>                                                                                                 |

**Table S2.** Atomic coordinates ( x 10<sup>4</sup>) and equivalent isotropic displacement parameters (Å<sup>2</sup> x 10<sup>3</sup>) for complex **6a**. U(eq) is defined as one third of the trace of the orthogonalized Uij tensor.

|       | x       | y        | z        | U(eq) |
|-------|---------|----------|----------|-------|
| Cu(1) | 1129(1) | 2152(1)  | 7022(1)  | 46(1) |
| Cl(1) | 3328(1) | 3440(1)  | 5418(1)  | 54(1) |
| Cl(2) | -940(1) | 1187(1)  | 8059(1)  | 46(1) |
| N(1)  | 2139(4) | 628(3)   | 6072(3)  | 42(1) |
| N(2)  | -23(3)  | 3842(3)  | 7404(3)  | 36(1) |
| N(3)  | 2040(4) | 1983(3)  | 8311(3)  | 41(1) |
| N(4)  | 402(3)  | 2376(3)  | 5664(3)  | 31(1) |
| N(5)  | 4182(4) | 1401(4)  | 10888(3) | 50(1) |
| O(1)  | -872(4) | 2075(4)  | 1830(3)  | 71(1) |
| C(1)  | 3104(5) | -236(4)  | 6337(4)  | 52(1) |
| C(2)  | 3720(5) | -1216(5) | 5621(5)  | 62(2) |
| C(3)  | 3347(5) | -1379(5) | 4604(4)  | 52(1) |
| C(4)  | 2356(4) | -524(4)  | 4324(4)  | 41(1) |
| C(5)  | 1787(4) | 491(4)   | 5062(4)  | 34(1) |
| C(6)  | 764(4)  | 1506(4)  | 4828(4)  | 33(1) |
| C(7)  | 223(4)  | 1618(4)  | 3861(4)  | 34(1) |

|       |          |         |          |        |
|-------|----------|---------|----------|--------|
| C(8)  | -708(4)  | 2661(4) | 3772(4)  | 34(1)  |
| C(9)  | -1068(4) | 3566(4) | 4667(3)  | 34(1)  |
| C(10) | -487(4)  | 3392(4) | 5597(3)  | 31(1)  |
| C(11) | -1270(4) | 2850(4) | 2764(4)  | 41(1)  |
| C(12) | -2163(4) | 3782(4) | 2583(4)  | 42(1)  |
| C(13) | -2355(6) | 3616(6) | 1464(5)  | 71(2)  |
| C(14) | -1596(6) | 2612(6) | 1023(5)  | 67(2)  |
| C(15) | -730(4)  | 4235(4) | 6606(3)  | 32(1)  |
| C(16) | -1617(4) | 5329(4) | 6761(4)  | 40(1)  |
| C(17) | -1803(5) | 6018(4) | 7759(4)  | 51(1)  |
| C(18) | -1100(5) | 5615(5) | 8588(4)  | 54(1)  |
| C(19) | -214(5)  | 4537(4) | 8359(4)  | 49(1)  |
| C(20) | 1745(4)  | 1238(4) | 9192(4)  | 44(1)  |
| C(21) | 2423(4)  | 1017(4) | 10052(4) | 43(1)  |
| C(22) | 3493(4)  | 1591(4) | 10065(4) | 39(1)  |
| C(23) | 3786(5)  | 2371(5) | 9138(4)  | 47(1)  |
| C(24) | 3069(5)  | 2527(5) | 8316(4)  | 46(1)  |
| C(25) | 3826(5)  | 622(5)  | 11859(4) | 61(2)  |
| C(26) | 5270(5)  | 2023(6) | 10917(5) | 75(2)  |
| O(2)  | 5531(4)  | 4527(4) | 6372(4)  | 94(2)  |
| O(3)  | 6498(4)  | 3430(6) | 8289(5)  | 122(2) |

**Table S3.** Bond lengths [Å] and angles [deg] for complex **6a**.

|             |            |
|-------------|------------|
| Cu(1)-N(4)  | 1.926(3)   |
| Cu(1)-N(3)  | 1.969(4)   |
| Cu(1)-N(1)  | 2.030(4)   |
| Cu(1)-N(2)  | 2.034(4)   |
| Cu(1)-Cl(2) | 2.6835(19) |
| Cu(1)-Cl(1) | 3.228(2)   |
| N(1)-C(5)   | 1.347(5)   |
| N(1)-C(1)   | 1.356(6)   |
| N(2)-C(19)  | 1.333(5)   |
| N(2)-C(15)  | 1.351(5)   |
| N(3)-C(20)  | 1.344(6)   |
| N(3)-C(24)  | 1.344(6)   |
| N(4)-C(6)   | 1.333(5)   |
| N(4)-C(10)  | 1.344(5)   |
| N(5)-C(22)  | 1.335(5)   |
| N(5)-C(25)  | 1.458(6)   |
| N(5)-C(26)  | 1.459(6)   |
| O(1)-C(11)  | 1.352(6)   |
| O(1)-C(14)  | 1.413(7)   |

|              |          |
|--------------|----------|
| C(1)-C(2)    | 1.359(7) |
| C(1)-H(1A)   | 0.9300   |
| C(2)-C(3)    | 1.371(7) |
| C(2)-H(2A)   | 0.9300   |
| C(3)-C(4)    | 1.377(6) |
| C(3)-H(3A)   | 0.9300   |
| C(4)-C(5)    | 1.391(6) |
| C(4)-H(4A)   | 0.9300   |
| C(5)-C(6)    | 1.482(6) |
| C(6)-C(7)    | 1.385(6) |
| C(7)-C(8)    | 1.395(6) |
| C(7)-H(7A)   | 0.9300   |
| C(8)-C(9)    | 1.408(6) |
| C(8)-C(11)   | 1.445(6) |
| C(9)-C(10)   | 1.371(5) |
| C(9)-H(9A)   | 0.9300   |
| C(10)-C(15)  | 1.472(6) |
| C(11)-C(12)  | 1.318(6) |
| C(12)-C(13)  | 1.404(7) |
| C(12)-H(12A) | 0.9300   |
| C(13)-C(14)  | 1.289(8) |
| C(13)-H(13A) | 0.9300   |
| C(14)-H(14A) | 0.9300   |
| C(15)-C(16)  | 1.379(6) |
| C(16)-C(17)  | 1.372(6) |
| C(16)-H(16A) | 0.9300   |
| C(17)-C(18)  | 1.382(7) |
| C(17)-H(17A) | 0.9300   |
| C(18)-C(19)  | 1.367(7) |
| C(18)-H(18A) | 0.9300   |
| C(19)-H(19A) | 0.9300   |
| C(20)-C(21)  | 1.367(6) |
| C(20)-H(20A) | 0.9300   |
| C(21)-C(22)  | 1.405(6) |
| C(21)-H(21A) | 0.9300   |
| C(22)-C(23)  | 1.408(6) |
| C(23)-C(24)  | 1.353(6) |
| C(23)-H(23A) | 0.9300   |
| C(24)-H(24A) | 0.9300   |
| C(25)-H(25A) | 0.9600   |
| C(25)-H(25B) | 0.9600   |
| C(25)-H(25C) | 0.9600   |
| C(26)-H(26A) | 0.9600   |
| C(26)-H(26B) | 0.9600   |

|                   |            |
|-------------------|------------|
| C(26)-H(26C)      | 0.9600     |
| O(2)-H(1O2)       | 0.8500     |
| O(2)-H(2O2)       | 0.8500     |
| O(3)-H(1O3)       | 0.8499     |
| O(3)-H(2O3)       | 0.8501     |
|                   |            |
| N(4)-Cu(1)-N(3)   | 173.77(15) |
| N(4)-Cu(1)-N(1)   | 79.80(14)  |
| N(3)-Cu(1)-N(1)   | 98.69(15)  |
| N(4)-Cu(1)-N(2)   | 79.97(14)  |
| N(3)-Cu(1)-N(2)   | 100.87(14) |
| N(1)-Cu(1)-N(2)   | 159.12(15) |
| N(4)-Cu(1)-Cl(2)  | 89.03(11)  |
| N(3)-Cu(1)-Cl(2)  | 97.17(13)  |
| N(1)-Cu(1)-Cl(2)  | 97.57(12)  |
| N(2)-Cu(1)-Cl(2)  | 87.18(11)  |
| N(4)-Cu(1)-Cl(1)  | 80.84(11)  |
| N(3)-Cu(1)-Cl(1)  | 92.98(13)  |
| N(1)-Cu(1)-Cl(1)  | 82.34(12)  |
| N(2)-Cu(1)-Cl(1)  | 89.41(11)  |
| Cl(2)-Cu(1)-Cl(1) | 169.73(4)  |
| C(5)-N(1)-C(1)    | 118.1(4)   |
| C(5)-N(1)-Cu(1)   | 114.2(3)   |
| C(1)-N(1)-Cu(1)   | 127.7(3)   |
| C(19)-N(2)-C(15)  | 118.1(4)   |
| C(19)-N(2)-Cu(1)  | 127.8(3)   |
| C(15)-N(2)-Cu(1)  | 113.9(3)   |
| C(20)-N(3)-C(24)  | 115.6(4)   |
| C(20)-N(3)-Cu(1)  | 122.2(3)   |
| C(24)-N(3)-Cu(1)  | 121.9(3)   |
| C(6)-N(4)-C(10)   | 121.5(3)   |
| C(6)-N(4)-Cu(1)   | 119.4(3)   |
| C(10)-N(4)-Cu(1)  | 119.1(3)   |
| C(22)-N(5)-C(25)  | 121.5(4)   |
| C(22)-N(5)-C(26)  | 122.4(4)   |
| C(25)-N(5)-C(26)  | 116.0(4)   |
| C(11)-O(1)-C(14)  | 104.9(4)   |
| N(1)-C(1)-C(2)    | 122.3(5)   |
| N(1)-C(1)-H(1A)   | 118.8      |
| C(2)-C(1)-H(1A)   | 118.8      |
| C(1)-C(2)-C(3)    | 120.0(5)   |
| C(1)-C(2)-H(2A)   | 120.0      |
| C(3)-C(2)-H(2A)   | 120.0      |
| C(2)-C(3)-C(4)    | 118.7(5)   |

|                    |          |
|--------------------|----------|
| C(2)-C(3)-H(3A)    | 120.7    |
| C(4)-C(3)-H(3A)    | 120.7    |
| C(3)-C(4)-C(5)     | 119.3(4) |
| C(3)-C(4)-H(4A)    | 120.3    |
| C(5)-C(4)-H(4A)    | 120.3    |
| N(1)-C(5)-C(4)     | 121.5(4) |
| N(1)-C(5)-C(6)     | 114.0(4) |
| C(4)-C(5)-C(6)     | 124.5(4) |
| N(4)-C(6)-C(7)     | 120.8(4) |
| N(4)-C(6)-C(5)     | 112.4(4) |
| C(7)-C(6)-C(5)     | 126.8(4) |
| C(6)-C(7)-C(8)     | 118.9(4) |
| C(6)-C(7)-H(7A)    | 120.5    |
| C(8)-C(7)-H(7A)    | 120.5    |
| C(7)-C(8)-C(9)     | 119.1(4) |
| C(7)-C(8)-C(11)    | 121.4(4) |
| C(9)-C(8)-C(11)    | 119.5(4) |
| C(10)-C(9)-C(8)    | 118.7(4) |
| C(10)-C(9)-H(9A)   | 120.6    |
| C(8)-C(9)-H(9A)    | 120.6    |
| N(4)-C(10)-C(9)    | 121.0(4) |
| N(4)-C(10)-C(15)   | 112.4(3) |
| C(9)-C(10)-C(15)   | 126.5(4) |
| C(12)-C(11)-O(1)   | 110.4(4) |
| C(12)-C(11)-C(8)   | 127.2(4) |
| O(1)-C(11)-C(8)    | 122.3(4) |
| C(11)-C(12)-C(13)  | 107.3(4) |
| C(11)-C(12)-H(12A) | 126.3    |
| C(13)-C(12)-H(12A) | 126.3    |
| C(14)-C(13)-C(12)  | 107.8(5) |
| C(14)-C(13)-H(13A) | 126.1    |
| C(12)-C(13)-H(13A) | 126.1    |
| C(13)-C(14)-O(1)   | 109.5(5) |
| C(13)-C(14)-H(14A) | 125.2    |
| O(1)-C(14)-H(14A)  | 125.2    |
| N(2)-C(15)-C(16)   | 121.5(4) |
| N(2)-C(15)-C(10)   | 114.5(3) |
| C(16)-C(15)-C(10)  | 124.0(4) |
| C(17)-C(16)-C(15)  | 119.0(4) |
| C(17)-C(16)-H(16A) | 120.5    |
| C(15)-C(16)-H(16A) | 120.5    |
| C(16)-C(17)-C(18)  | 120.0(4) |
| C(16)-C(17)-H(17A) | 120.0    |
| C(18)-C(17)-H(17A) | 120.0    |

|                     |          |
|---------------------|----------|
| C(19)-C(18)-C(17)   | 117.6(4) |
| C(19)-C(18)-H(18A)  | 121.2    |
| C(17)-C(18)-H(18A)  | 121.2    |
| N(2)-C(19)-C(18)    | 123.8(4) |
| N(2)-C(19)-H(19A)   | 118.1    |
| C(18)-C(19)-H(19A)  | 118.1    |
| N(3)-C(20)-C(21)    | 124.0(4) |
| N(3)-C(20)-H(20A)   | 118.0    |
| C(21)-C(20)-H(20A)  | 118.0    |
| C(20)-C(21)-C(22)   | 120.4(4) |
| C(20)-C(21)-H(21A)  | 119.8    |
| C(22)-C(21)-H(21A)  | 119.8    |
| N(5)-C(22)-C(21)    | 122.4(4) |
| N(5)-C(22)-C(23)    | 122.8(4) |
| C(21)-C(22)-C(23)   | 114.8(4) |
| C(24)-C(23)-C(22)   | 120.7(4) |
| C(24)-C(23)-H(23A)  | 119.6    |
| C(22)-C(23)-H(23A)  | 119.6    |
| N(3)-C(24)-C(23)    | 124.3(4) |
| N(3)-C(24)-H(24A)   | 117.8    |
| C(23)-C(24)-H(24A)  | 117.8    |
| N(5)-C(25)-H(25A)   | 109.5    |
| N(5)-C(25)-H(25B)   | 109.5    |
| H(25A)-C(25)-H(25B) | 109.5    |
| N(5)-C(25)-H(25C)   | 109.5    |
| H(25A)-C(25)-H(25C) | 109.5    |
| H(25B)-C(25)-H(25C) | 109.5    |
| N(5)-C(26)-H(26A)   | 109.5    |
| N(5)-C(26)-H(26B)   | 109.5    |
| H(26A)-C(26)-H(26B) | 109.5    |
| N(5)-C(26)-H(26C)   | 109.5    |
| H(26A)-C(26)-H(26C) | 109.5    |
| H(26B)-C(26)-H(26C) | 109.5    |
| H(1O2)-O(2)-H(2O2)  | 107.7    |
| H(1O3)-O(3)-H(2O3)  | 107.7    |

---

Symmetry transformations used to generate equivalent atoms:

**Table S4.** Anisotropic displacement parameters ( $\text{\AA}^2 \times 10^3$ ) for complex **6a**. The anisotropic displacement factor exponent takes the form:  $-2 \pi^2 [ h^2 a^{*2} U_{11} + \dots + 2 h k a^* b^* U_{12} ]$ .

---

|     |     |     |     |     |     |
|-----|-----|-----|-----|-----|-----|
| U11 | U22 | U33 | U23 | U13 | U12 |
|-----|-----|-----|-----|-----|-----|

---

|       |       |        |        |        |        |        |
|-------|-------|--------|--------|--------|--------|--------|
| Cu(1) | 57(1) | 41(1)  | 42(1)  | -4(1)  | -29(1) | 9(1)   |
| Cl(1) | 51(1) | 51(1)  | 60(1)  | 10(1)  | -20(1) | 0(1)   |
| Cl(2) | 53(1) | 49(1)  | 42(1)  | 5(1)   | -16(1) | -20(1) |
| N(1)  | 42(2) | 37(2)  | 44(2)  | 0(2)   | -14(2) | 3(2)   |
| N(2)  | 39(2) | 36(2)  | 34(2)  | 3(2)   | -13(2) | -7(2)  |
| N(3)  | 47(2) | 40(2)  | 38(2)  | 0(2)   | -17(2) | -2(2)  |
| N(4)  | 31(2) | 33(2)  | 31(2)  | 2(1)   | -9(1)  | -3(2)  |
| N(5)  | 40(2) | 68(3)  | 49(2)  | 17(2)  | -22(2) | -15(2) |
| O(1)  | 73(3) | 78(3)  | 60(2)  | 3(2)   | -21(2) | -1(2)  |
| C(1)  | 52(3) | 49(3)  | 52(3)  | 2(2)   | -22(2) | 12(2)  |
| C(2)  | 57(3) | 52(3)  | 70(4)  | 4(3)   | -22(3) | 14(3)  |
| C(3)  | 53(3) | 46(3)  | 50(3)  | -4(2)  | -7(2)  | 5(2)   |
| C(4)  | 43(3) | 41(3)  | 36(2)  | 1(2)   | -8(2)  | -5(2)  |
| C(5)  | 34(2) | 31(2)  | 40(2)  | 6(2)   | -10(2) | -6(2)  |
| C(6)  | 30(2) | 32(2)  | 37(2)  | 5(2)   | -7(2)  | -8(2)  |
| C(7)  | 35(2) | 35(2)  | 31(2)  | -2(2)  | -7(2)  | -5(2)  |
| C(8)  | 30(2) | 41(2)  | 31(2)  | 5(2)   | -8(2)  | -11(2) |
| C(9)  | 31(2) | 37(2)  | 35(2)  | 5(2)   | -9(2)  | -6(2)  |
| C(10) | 28(2) | 34(2)  | 32(2)  | 5(2)   | -7(2)  | -6(2)  |
| C(11) | 41(3) | 54(3)  | 33(2)  | 0(2)   | -11(2) | -13(2) |
| C(12) | 42(3) | 35(2)  | 48(3)  | -7(2)  | -17(2) | 2(2)   |
| C(13) | 64(4) | 75(4)  | 84(4)  | 23(3)  | -46(3) | -4(3)  |
| C(14) | 90(4) | 91(5)  | 34(3)  | 4(3)   | -31(3) | -31(4) |
| C(15) | 31(2) | 31(2)  | 37(2)  | 6(2)   | -10(2) | -10(2) |
| C(16) | 40(2) | 38(2)  | 45(3)  | 7(2)   | -13(2) | -8(2)  |
| C(17) | 56(3) | 40(3)  | 52(3)  | -8(2)  | -8(2)  | 1(2)   |
| C(18) | 64(3) | 46(3)  | 50(3)  | -13(2) | -16(3) | -1(2)  |
| C(19) | 59(3) | 47(3)  | 45(3)  | -4(2)  | -24(2) | -8(2)  |
| C(20) | 42(3) | 47(3)  | 49(3)  | 6(2)   | -19(2) | -11(2) |
| C(21) | 40(2) | 46(3)  | 47(3)  | 13(2)  | -14(2) | -12(2) |
| C(22) | 34(2) | 46(3)  | 38(2)  | 6(2)   | -11(2) | -1(2)  |
| C(23) | 43(3) | 55(3)  | 47(3)  | 14(2)  | -11(2) | -20(2) |
| C(24) | 50(3) | 54(3)  | 39(3)  | 15(2)  | -14(2) | -13(2) |
| C(25) | 63(3) | 82(4)  | 44(3)  | 23(3)  | -23(3) | -11(3) |
| C(26) | 55(3) | 109(5) | 78(4)  | 24(4)  | -38(3) | -34(3) |
| O(2)  | 81(3) | 112(4) | 105(4) | 39(3)  | -49(3) | -26(3) |
| O(3)  | 66(3) | 150(5) | 135(5) | 59(4)  | 8(3)   | -22(3) |

**Table S5.** Hydrogen coordinates ( $\times 10^4$ ) and isotropic displacement parameters ( $\text{\AA}^2 \times 10^3$ ) for complex **6a**.

|       | x    | y     | z    | U(eq) |
|-------|------|-------|------|-------|
| H(1A) | 3352 | -154  | 7034 | 63    |
| H(2A) | 4396 | -1777 | 5820 | 74    |



|        |       |       |       |     |
|--------|-------|-------|-------|-----|
| H(3A)  | 3754  | -2054 | 4114  | 63  |
| H(4A)  | 2071  | -624  | 3649  | 49  |
| H(7A)  | 477   | 1008  | 3279  | 41  |
| H(9A)  | -1688 | 4269  | 4629  | 41  |
| H(12A) | -2588 | 4429  | 3100  | 50  |
| H(13A) | -2928 | 4138  | 1104  | 85  |
| H(14A) | -1534 | 2289  | 288   | 81  |
| H(16A) | -2083 | 5597  | 6197  | 48  |
| H(17A) | -2401 | 6756  | 7878  | 62  |
| H(18A) | -1225 | 6061  | 9277  | 64  |
| H(19A) | 284   | 4274  | 8901  | 58  |
| H(20A) | 1036  | 850   | 9218  | 53  |
| H(21A) | 2175  | 482   | 10634 | 52  |
| H(23A) | 4481  | 2785  | 9090  | 56  |
| H(24A) | 3303  | 3044  | 7715  | 56  |
| H(25A) | 3110  | 249   | 11753 | 92  |
| H(25B) | 3572  | 1114  | 12560 | 92  |
| H(25C) | 4559  | -12   | 11902 | 92  |
| H(26A) | 5428  | 2506  | 10242 | 112 |
| H(26B) | 6036  | 1419  | 10935 | 112 |
| H(26C) | 5061  | 2553  | 11593 | 112 |
| H(1O2) | 5567  | 4659  | 7068  | 113 |
| H(2O2) | 4871  | 5015  | 6233  | 113 |
| H(1O3) | 6639  | 3915  | 8782  | 146 |
| H(2O3) | 7156  | 2848  | 8132  | 146 |

## 12. Crystal structure of Cu(II)-terpyridine complex 7.

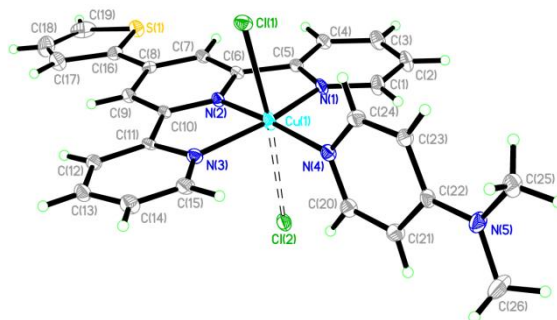

**Figure S9.** Molecular Structure of Complex 7.

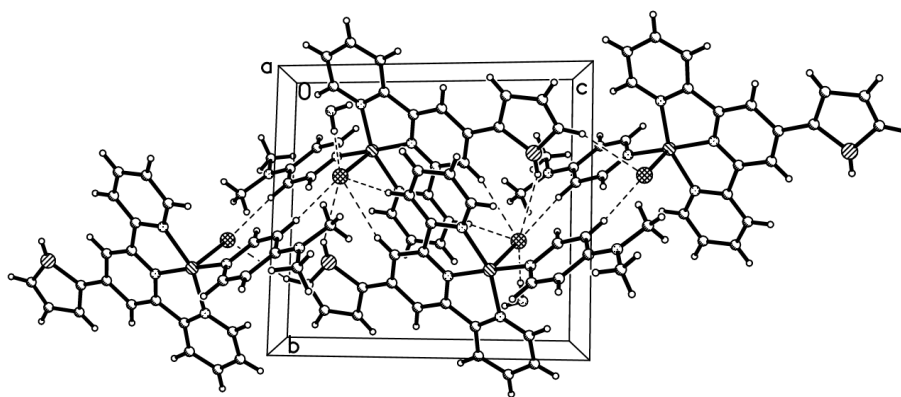

**Figure S10.** Cell unit formed by complex **7**.

**Table S6.** Crystal data and structure refinement for complex **7**.

|                                  |                                                                                    |                 |
|----------------------------------|------------------------------------------------------------------------------------|-----------------|
| Identification code              | complex <b>7</b>                                                                   |                 |
| Empirical formula                | C <sub>26</sub> H <sub>27</sub> Cl <sub>2</sub> Cu N <sub>5</sub> O <sub>2</sub> S |                 |
| Formula weight                   | 608.02                                                                             |                 |
| Temperature                      | 173(2) K                                                                           |                 |
| Wavelength                       | 0.71073 Å                                                                          |                 |
| Crystal system                   | Triclinic                                                                          |                 |
| Space group                      | P -1                                                                               |                 |
| Unit cell dimensions             | a = 10.634(3) Å                                                                    | a = 89.311(4) ° |
|                                  | b = 10.982(3) Å                                                                    | b = 77.918(4) ° |
|                                  | c = 11.926(3) Å                                                                    | g = 79.929(4) ° |
| Volume                           | 1340.6(6) Å <sup>3</sup>                                                           |                 |
| Z                                | 2                                                                                  |                 |
| Density (calculated)             | 1.506 Mg/m <sup>3</sup>                                                            |                 |
| Absorption coefficient           | 1.126 mm <sup>-1</sup>                                                             |                 |
| F(000)                           | 626                                                                                |                 |
| Crystal size                     | 0.110 x 0.040 x 0.030 mm <sup>3</sup>                                              |                 |
| Theta range for data collection  | 1.747 to 25.997 °                                                                  |                 |
| Index ranges                     | -13<=h<=12, -12<=k<=13, -14<=l<=14                                                 |                 |
| Reflections collected            | 8686                                                                               |                 |
| Independent reflections          | 5183 [R(int) = 0.0338]                                                             |                 |
| Completeness to theta = 25.242 ° | 98.3 %                                                                             |                 |
| Absorption correction            | Semi-empirical from equivalents                                                    |                 |
| Refinement method                | Full-matrix least-squares on F <sup>2</sup>                                        |                 |
| Data / restraints / parameters   | 5183 / 8 / 352                                                                     |                 |

|                                      |                                    |
|--------------------------------------|------------------------------------|
| Goodness-of-fit on $F^2$             | 1.077                              |
| Final R indices [ $I > 2\sigma(I)$ ] | R1 = 0.0593, wR2 = 0.1666          |
| R indices (all data)                 | R1 = 0.0831, wR2 = 0.2024          |
| Extinction coefficient               | n/a                                |
| Largest diff. peak and hole          | 1.465 and -0.907 e.Å <sup>-3</sup> |

**Table S7.** Atomic coordinates ( $\times 10^4$ ) and equivalent isotropic displacement parameters (Å<sup>2</sup> $\times 10^3$ ) for complex **7**.

U(eq) is defined as one third of the trace of the orthogonalized  $U_{ij}$  tensor.

|        | x       | y        | z       | U(eq) |
|--------|---------|----------|---------|-------|
| Cu(1)  | 3904(1) | 2832(1)  | 2970(1) | 25(1) |
| Cl(1)  | 5943(1) | 3821(1)  | 1974(1) | 27(1) |
| Cl(2)  | 8384(1) | 8404(1)  | 5361(1) | 31(1) |
| N(1)   | 2888(4) | 4343(3)  | 3928(3) | 23(1) |
| N(2)   | 4623(3) | 2585(3)  | 4328(3) | 19(1) |
| N(3)   | 5063(4) | 1136(4)  | 2568(3) | 23(1) |
| N(4)   | 2963(4) | 3015(4)  | 1706(3) | 23(1) |
| N(5)   | 782(4)  | 3640(4)  | -853(4) | 33(1) |
| C(1)   | 1909(5) | 5189(5)  | 3670(4) | 32(1) |
| C(2)   | 1287(5) | 6195(5)  | 4384(4) | 34(1) |
| C(3)   | 1681(5) | 6325(5)  | 5405(4) | 33(1) |
| C(4)   | 2675(4) | 5474(4)  | 5676(4) | 25(1) |
| C(5)   | 3241(4) | 4478(4)  | 4936(4) | 20(1) |
| C(6)   | 4266(4) | 3452(4)  | 5167(4) | 19(1) |
| C(7)   | 4825(4) | 3323(4)  | 6126(4) | 21(1) |
| C(8)   | 5755(4) | 2281(4)  | 6213(4) | 20(1) |
| C(9)   | 6101(4) | 1381(4)  | 5316(4) | 20(1) |
| C(10)  | 5511(4) | 1566(4)  | 4377(4) | 19(1) |
| C(11)  | 5768(4) | 736(4)   | 3363(4) | 18(1) |
| C(12)  | 6649(4) | -377(4)  | 3225(4) | 25(1) |
| C(13)  | 6840(5) | -1039(4) | 2203(4) | 28(1) |
| C(14)  | 6146(5) | -592(5)  | 1376(4) | 31(1) |
| C(15)  | 5263(5) | 465(4)   | 1601(4) | 28(1) |
| C(16)  | 6335(4) | 2079(4)  | 7224(4) | 23(1) |
| C(17)  | 7379(3) | 1011(3)  | 7399(2) | 35(1) |
| C(18)  | 7510(6) | 1172(6)  | 8567(6) | 50(2) |
| C(19)  | 6783(7) | 2166(7)  | 9135(5) | 48(2) |
| S(1)   | 5853(2) | 3013(2)  | 8398(1) | 29(1) |
| S(1')  | 7379(3) | 1011(3)  | 7399(2) | 35(1) |
| C(19') | 7510(6) | 1172(6)  | 8567(6) | 50(2) |

|        |         |         |          |       |
|--------|---------|---------|----------|-------|
| C(18') | 6783(7) | 2166(7) | 9135(5)  | 48(2) |
| C(17') | 5853(2) | 3013(2) | 8398(1)  | 29(1) |
| C(20)  | 1931(5) | 2457(5) | 1705(4)  | 27(1) |
| C(21)  | 1188(5) | 2635(5) | 893(4)   | 28(1) |
| C(22)  | 1484(4) | 3448(4) | -27(4)   | 24(1) |
| C(23)  | 2565(5) | 4022(5) | -11(4)   | 26(1) |
| C(24)  | 3252(5) | 3791(5) | 830(4)   | 28(1) |
| C(25)  | 1147(5) | 4426(5) | -1821(4) | 35(1) |
| C(26)  | -298(5) | 2993(6) | -878(5)  | 47(2) |
| O(1)   | 601(4)  | 9428(4) | 6346(4)  | 47(1) |
| O(2)   | 8472(4) | 1541(5) | 1695(4)  | 62(1) |

**Table S8.** Bond lengths [Å] and angles [°] for complex **7**.

|             |            |
|-------------|------------|
| Cu(1)-N(2)  | 1.927(4)   |
| Cu(1)-N(4)  | 1.967(4)   |
| Cu(1)-N(1)  | 2.032(4)   |
| Cu(1)-N(3)  | 2.046(4)   |
| Cu(1)-Cl(1) | 2.6474(13) |
| Cu(1)-Cl(2) | 3.2840(5)  |
| N(1)-C(5)   | 1.350(6)   |
| N(1)-C(1)   | 1.353(6)   |
| N(2)-C(6)   | 1.338(5)   |
| N(2)-C(10)  | 1.342(6)   |
| N(3)-C(15)  | 1.334(6)   |
| N(3)-C(11)  | 1.352(6)   |
| N(4)-C(20)  | 1.348(6)   |
| N(4)-C(24)  | 1.358(6)   |
| N(5)-C(22)  | 1.349(6)   |
| N(5)-C(26)  | 1.457(7)   |
| N(5)-C(25)  | 1.461(6)   |
| C(1)-C(2)   | 1.384(7)   |
| C(1)-H(1)   | 0.9500     |
| C(2)-C(3)   | 1.384(7)   |
| C(2)-H(2)   | 0.9500     |
| C(3)-C(4)   | 1.374(7)   |
| C(3)-H(3)   | 0.9500     |
| C(4)-C(5)   | 1.381(6)   |
| C(4)-H(4)   | 0.9500     |
| C(5)-C(6)   | 1.491(6)   |
| C(6)-C(7)   | 1.390(6)   |
| C(7)-C(8)   | 1.394(6)   |
| C(7)-H(7)   | 0.9500     |

|                 |            |
|-----------------|------------|
| C(8)-C(9)       | 1.411(6)   |
| C(8)-C(16)      | 1.463(6)   |
| C(9)-C(10)      | 1.390(6)   |
| C(9)-H(9)       | 0.9500     |
| C(10)-C(11)     | 1.472(6)   |
| C(11)-C(12)     | 1.393(6)   |
| C(12)-C(13)     | 1.387(6)   |
| C(12)-H(12)     | 0.9500     |
| C(13)-C(14)     | 1.388(7)   |
| C(13)-H(13)     | 0.9500     |
| C(14)-C(15)     | 1.349(7)   |
| C(14)-H(14)     | 0.9500     |
| C(15)-H(15)     | 0.9500     |
| C(16)-C(17)     | 1.512(6)   |
| C(16)-S(1)      | 1.681(5)   |
| C(17)-C(18)     | 1.445(7)   |
| C(17)-H(17)     | 0.9500     |
| C(18)-C(19)     | 1.323(10)  |
| C(18)-H(18)     | 0.9500     |
| C(19)-S(1)      | 1.625(7)   |
| C(19)-H(19)     | 0.9500     |
| C(20)-C(21)     | 1.364(7)   |
| C(20)-H(20)     | 0.9500     |
| C(21)-C(22)     | 1.425(6)   |
| C(21)-H(21)     | 0.9500     |
| C(22)-C(23)     | 1.408(6)   |
| C(23)-C(24)     | 1.357(7)   |
| C(23)-H(23)     | 0.9500     |
| C(24)-H(24)     | 0.9500     |
| C(25)-H(25A)    | 0.9800     |
| C(25)-H(25B)    | 0.9800     |
| C(25)-H(25C)    | 0.9800     |
| C(26)-H(26A)    | 0.9800     |
| C(26)-H(26B)    | 0.9800     |
| C(26)-H(26C)    | 0.9800     |
| O(1)-H(1A)      | 0.85(2)    |
| O(1)-H(1B)      | 0.840(19)  |
| O(2)-H(2A)      | 0.845(18)  |
| O(2)-H(2B)      | 0.830(19)  |
| <br>            |            |
| N(2)-Cu(1)-N(4) | 172.42(15) |
| N(2)-Cu(1)-N(1) | 79.82(15)  |
| N(4)-Cu(1)-N(1) | 98.06(15)  |
| N(2)-Cu(1)-N(3) | 80.25(15)  |

|                  |            |
|------------------|------------|
| N(4)-Cu(1)-N(3)  | 101.03(15) |
| N(1)-Cu(1)-N(3)  | 159.43(15) |
| N(2)-Cu(1)-Cl(1) | 89.43(11)  |
| N(4)-Cu(1)-Cl(1) | 98.08(12)  |
| N(1)-Cu(1)-Cl(1) | 97.43(11)  |
| N(3)-Cu(1)-Cl(1) | 87.44(11)  |
| C(5)-N(1)-C(1)   | 118.2(4)   |
| C(5)-N(1)-Cu(1)  | 114.5(3)   |
| C(1)-N(1)-Cu(1)  | 127.3(3)   |
| C(6)-N(2)-C(10)  | 122.1(4)   |
| C(6)-N(2)-Cu(1)  | 119.4(3)   |
| C(10)-N(2)-Cu(1) | 118.5(3)   |
| C(15)-N(3)-C(11) | 118.6(4)   |
| C(15)-N(3)-Cu(1) | 127.7(3)   |
| C(11)-N(3)-Cu(1) | 113.4(3)   |
| C(20)-N(4)-C(24) | 116.2(4)   |
| C(20)-N(4)-Cu(1) | 122.0(3)   |
| C(24)-N(4)-Cu(1) | 121.7(3)   |
| C(22)-N(5)-C(26) | 121.8(4)   |
| C(22)-N(5)-C(25) | 121.1(4)   |
| C(26)-N(5)-C(25) | 116.8(4)   |
| N(1)-C(1)-C(2)   | 122.5(5)   |
| N(1)-C(1)-H(1)   | 118.7      |
| C(2)-C(1)-H(1)   | 118.7      |
| C(3)-C(2)-C(1)   | 118.2(5)   |
| C(3)-C(2)-H(2)   | 120.9      |
| C(1)-C(2)-H(2)   | 120.9      |
| C(4)-C(3)-C(2)   | 119.9(5)   |
| C(4)-C(3)-H(3)   | 120.1      |
| C(2)-C(3)-H(3)   | 120.1      |
| C(3)-C(4)-C(5)   | 119.1(4)   |
| C(3)-C(4)-H(4)   | 120.5      |
| C(5)-C(4)-H(4)   | 120.5      |
| N(1)-C(5)-C(4)   | 122.1(4)   |
| N(1)-C(5)-C(6)   | 113.7(4)   |
| C(4)-C(5)-C(6)   | 124.3(4)   |
| N(2)-C(6)-C(7)   | 120.3(4)   |
| N(2)-C(6)-C(5)   | 112.3(4)   |
| C(7)-C(6)-C(5)   | 127.3(4)   |
| C(6)-C(7)-C(8)   | 119.7(4)   |
| C(6)-C(7)-H(7)   | 120.2      |
| C(8)-C(7)-H(7)   | 120.2      |
| C(7)-C(8)-C(9)   | 118.5(4)   |
| C(7)-C(8)-C(16)  | 121.8(4)   |

|                   |          |
|-------------------|----------|
| C(9)-C(8)-C(16)   | 119.7(4) |
| C(10)-C(9)-C(8)   | 119.0(4) |
| C(10)-C(9)-H(9)   | 120.5    |
| C(8)-C(9)-H(9)    | 120.5    |
| N(2)-C(10)-C(9)   | 120.4(4) |
| N(2)-C(10)-C(11)  | 113.3(4) |
| C(9)-C(10)-C(11)  | 126.3(4) |
| N(3)-C(11)-C(12)  | 122.0(4) |
| N(3)-C(11)-C(10)  | 114.4(4) |
| C(12)-C(11)-C(10) | 123.6(4) |
| C(13)-C(12)-C(11) | 117.5(4) |
| C(13)-C(12)-H(12) | 121.3    |
| C(11)-C(12)-H(12) | 121.3    |
| C(12)-C(13)-C(14) | 119.7(5) |
| C(12)-C(13)-H(13) | 120.1    |
| C(14)-C(13)-H(13) | 120.1    |
| C(15)-C(14)-C(13) | 119.0(4) |
| C(15)-C(14)-H(14) | 120.5    |
| C(13)-C(14)-H(14) | 120.5    |
| N(3)-C(15)-C(14)  | 123.0(5) |
| N(3)-C(15)-H(15)  | 118.5    |
| C(14)-C(15)-H(15) | 118.5    |
| C(8)-C(16)-C(17)  | 126.5(4) |
| C(8)-C(16)-S(1)   | 123.0(4) |
| C(17)-C(16)-S(1)  | 110.5(3) |
| C(18)-C(17)-C(16) | 104.7(4) |
| C(18)-C(17)-H(17) | 127.7    |
| C(16)-C(17)-H(17) | 127.7    |
| C(19)-C(18)-C(17) | 116.3(5) |
| C(19)-C(18)-H(18) | 121.9    |
| C(17)-C(18)-H(18) | 121.9    |
| C(18)-C(19)-S(1)  | 113.8(4) |
| C(18)-C(19)-H(19) | 123.1    |
| S(1)-C(19)-H(19)  | 123.1    |
| C(19)-S(1)-C(16)  | 94.7(3)  |
| N(4)-C(20)-C(21)  | 123.9(4) |
| N(4)-C(20)-H(20)  | 118.0    |
| C(21)-C(20)-H(20) | 118.0    |
| C(20)-C(21)-C(22) | 120.3(4) |
| C(20)-C(21)-H(21) | 119.9    |
| C(22)-C(21)-H(21) | 119.9    |
| N(5)-C(22)-C(23)  | 122.8(4) |
| N(5)-C(22)-C(21)  | 122.2(4) |
| C(23)-C(22)-C(21) | 115.0(4) |

|                     |          |
|---------------------|----------|
| C(24)-C(23)-C(22)   | 120.9(4) |
| C(24)-C(23)-H(23)   | 119.6    |
| C(22)-C(23)-H(23)   | 119.6    |
| C(23)-C(24)-N(4)    | 123.8(4) |
| C(23)-C(24)-H(24)   | 118.1    |
| N(4)-C(24)-H(24)    | 118.1    |
| N(5)-C(25)-H(25A)   | 109.5    |
| N(5)-C(25)-H(25B)   | 109.5    |
| H(25A)-C(25)-H(25B) | 109.5    |
| N(5)-C(25)-H(25C)   | 109.5    |
| H(25A)-C(25)-H(25C) | 109.5    |
| H(25B)-C(25)-H(25C) | 109.5    |
| N(5)-C(26)-H(26A)   | 109.5    |
| N(5)-C(26)-H(26B)   | 109.5    |
| H(26A)-C(26)-H(26B) | 109.5    |
| N(5)-C(26)-H(26C)   | 109.5    |
| H(26A)-C(26)-H(26C) | 109.5    |
| H(26B)-C(26)-H(26C) | 109.5    |
| H(1A)-O(1)-H(1B)    | 105(3)   |
| H(2A)-O(2)-H(2B)    | 108(3)   |

---

Symmetry transformations used to generate equivalent atoms:

**Table S9.** Anisotropic displacement parameters ( $\text{\AA}^2 \times 10^3$ ) for complex **7**. The anisotropic displacement factor exponent takes the form:  $-2p^2 [ h^2 a^*2U^{11} + \dots + 2 h k a^* b^* U^{12} ]$ .

---

|       | U <sup>11</sup> | U <sup>22</sup> | U <sup>33</sup> | U <sup>23</sup> | U <sup>13</sup> | U <sup>12</sup> |
|-------|-----------------|-----------------|-----------------|-----------------|-----------------|-----------------|
| Cu(1) | 36(1)           | 18(1)           | 23(1)           | -3(1)           | -16(1)          | 3(1)            |
| Cl(1) | 34(1)           | 24(1)           | 27(1)           | 1(1)            | -10(1)          | -9(1)           |
| Cl(2) | 36(1)           | 23(1)           | 34(1)           | 2(1)            | -14(1)          | 0(1)            |
| N(1)  | 29(2)           | 14(2)           | 25(2)           | 5(2)            | -10(2)          | 0(2)            |
| N(2)  | 22(2)           | 15(2)           | 20(2)           | -2(1)           | -5(1)           | 0(1)            |
| N(3)  | 27(2)           | 20(2)           | 22(2)           | -1(2)           | -7(2)           | -5(2)           |
| N(4)  | 32(2)           | 20(2)           | 20(2)           | 1(2)            | -11(2)          | -2(2)           |
| N(5)  | 30(2)           | 40(3)           | 33(2)           | 14(2)           | -16(2)          | -10(2)          |
| C(1)  | 34(3)           | 27(3)           | 32(3)           | -6(2)           | -12(2)          | 7(2)            |
| C(2)  | 38(3)           | 23(3)           | 36(3)           | 0(2)            | -8(2)           | 9(2)            |
| C(3)  | 37(3)           | 24(3)           | 33(3)           | -5(2)           | -4(2)           | 5(2)            |
| C(4)  | 31(3)           | 20(2)           | 25(2)           | 2(2)            | -7(2)           | -4(2)           |
| C(5)  | 22(2)           | 19(2)           | 21(2)           | 1(2)            | -5(2)           | -5(2)           |



|        |       |       |       |       |        |        |
|--------|-------|-------|-------|-------|--------|--------|
| C(6)   | 23(2) | 14(2) | 19(2) | 1(2)  | -4(2)  | -4(2)  |
| C(7)   | 26(2) | 17(2) | 18(2) | -2(2) | -4(2)  | -4(2)  |
| C(8)   | 21(2) | 21(2) | 20(2) | 0(2)  | -5(2)  | -7(2)  |
| C(9)   | 23(2) | 19(2) | 17(2) | -1(2) | -5(2)  | -2(2)  |
| C(10)  | 21(2) | 15(2) | 21(2) | 6(2)  | -4(2)  | -5(2)  |
| C(11)  | 23(2) | 12(2) | 20(2) | 3(2)  | -4(2)  | -6(2)  |
| C(12)  | 28(2) | 21(2) | 27(2) | 1(2)  | -9(2)  | -5(2)  |
| C(13)  | 31(3) | 21(2) | 30(3) | -4(2) | -6(2)  | 0(2)   |
| C(14)  | 40(3) | 28(3) | 26(2) | -5(2) | -10(2) | -5(2)  |
| C(15)  | 39(3) | 25(3) | 25(2) | 1(2)  | -18(2) | -9(2)  |
| C(16)  | 26(2) | 28(3) | 19(2) | 1(2)  | -7(2)  | -8(2)  |
| C(17)  | 48(2) | 29(2) | 31(2) | -3(1) | -19(1) | -2(1)  |
| C(18)  | 50(4) | 53(4) | 55(4) | 23(3) | -32(3) | -8(3)  |
| C(19)  | 66(4) | 64(4) | 24(3) | -1(3) | -16(3) | -35(4) |
| S(1)   | 37(1) | 26(1) | 25(1) | -4(1) | -12(1) | -1(1)  |
| S(1')  | 48(2) | 29(2) | 31(2) | -3(1) | -19(1) | -2(1)  |
| C(19') | 50(4) | 53(4) | 55(4) | 23(3) | -32(3) | -8(3)  |
| C(18') | 66(4) | 64(4) | 24(3) | -1(3) | -16(3) | -35(4) |
| C(17') | 37(1) | 26(1) | 25(1) | -4(1) | -12(1) | -1(1)  |
| C(20)  | 31(3) | 27(3) | 22(2) | 2(2)  | -7(2)  | -4(2)  |
| C(21)  | 32(3) | 29(3) | 25(2) | 10(2) | -7(2)  | -11(2) |
| C(22)  | 26(2) | 25(2) | 21(2) | 8(2)  | -7(2)  | -3(2)  |
| C(23)  | 29(2) | 27(3) | 24(2) | 8(2)  | -10(2) | -7(2)  |
| C(24)  | 30(2) | 26(3) | 29(2) | -1(2) | -9(2)  | -7(2)  |
| C(25)  | 42(3) | 40(3) | 25(2) | 11(2) | -14(2) | -6(2)  |
| C(26)  | 35(3) | 70(5) | 44(3) | 12(3) | -21(3) | -20(3) |
| O(1)   | 49(2) | 37(2) | 63(3) | 16(2) | -27(2) | -14(2) |
| O(2)   | 41(3) | 74(4) | 63(3) | 23(3) | 0(2)   | -6(2)  |

**Table S10.** Hydrogen coordinates ( $\times 10^4$ ) and isotropic displacement parameters ( $\text{\AA}^2 \times 10^3$ ) for complex **7**.

|       | x    | y     | z    | U(eq) |
|-------|------|-------|------|-------|
| H(1)  | 1638 | 5088  | 2972 | 38    |
| H(2)  | 608  | 6782  | 4179 | 41    |
| H(3)  | 1264 | 7000  | 5917 | 40    |
| H(4)  | 2970 | 5569  | 6364 | 30    |
| H(7)  | 4574 | 3942  | 6719 | 25    |
| H(9)  | 6728 | 658   | 5353 | 24    |
| H(12) | 7101 | -672  | 3809 | 30    |
| H(13) | 7444 | -1796 | 2069 | 33    |

|        |          |           |          |         |
|--------|----------|-----------|----------|---------|
| H(14)  | 6289     | -1022     | 662      | 37      |
| H(15)  | 4761     | 744       | 1046     | 33      |
| H(17)  | 7845     | 375       | 6860     | 42      |
| H(18)  | 8086     | 597       | 8908     | 60      |
| H(19)  | 6804     | 2366      | 9903     | 57      |
| H(19') | 8086     | 597       | 8908     | 60      |
| H(18') | 6804     | 2366      | 9903     | 57      |
| H(17') | 5250     | 3768      | 8570     | 35      |
| H(20)  | 1707     | 1908      | 2306     | 32      |
| H(21)  | 471      | 2214      | 941      | 34      |
| H(23)  | 2816     | 4580      | -596     | 31      |
| H(24)  | 3977     | 4194      | 806      | 33      |
| H(25A) | 1466     | 5133      | -1556    | 53      |
| H(25B) | 383      | 4724      | -2151    | 53      |
| H(25C) | 1837     | 3948      | -2406    | 53      |
| H(26A) | 44       | 2175      | -1245    | 70      |
| H(26B) | -893     | 3471      | -1314    | 70      |
| H(26C) | -771     | 2900      | -92      | 70      |
| H(1A)  | 130(90)  | 9160(70)  | 5950(70) | 140(40) |
| H(1B)  | 720(50)  | 10120(30) | 6070(40) | 23(13)  |
| H(2A)  | 8750(40) | 1350(40)  | 2300(30) | 18(13)  |
| H(2B)  | 8010(40) | 2240(30)  | 1800(40) | 27      |

**Table S11.** Hydrogen bonds for complex **7** [ $\text{\AA}$  and  $^\circ$ ].

| D-H...A               | d(D-H)    | d(H...A) | d(D...A) | $\angle(\text{DHA})$ |
|-----------------------|-----------|----------|----------|----------------------|
| C(4)-H(4)...Cl(1)#1   | 0.95      | 2.64     | 3.575(5) | 167.9                |
| C(7)-H(7)...Cl(1)#1   | 0.95      | 2.83     | 3.760(5) | 165.3                |
| C(9)-H(9)...Cl(2)#2   | 0.95      | 2.78     | 3.723(5) | 173.7                |
| C(12)-H(12)...Cl(2)#2 | 0.95      | 2.62     | 3.565(5) | 177.0                |
| C(21)-H(21)...O(2)#3  | 0.95      | 2.37     | 3.275(7) | 159.7                |
| C(23)-H(23)...Cl(1)#4 | 0.95      | 2.71     | 3.638(5) | 164.8                |
| O(1)-H(1A)...Cl(2)#3  | 0.85(2)   | 2.39(3)  | 3.213(5) | 163(9)               |
| O(1)-H(1B)...Cl(2)#5  | 0.840(19) | 2.50(3)  | 3.293(4) | 157(5)               |
| O(2)-H(2A)...O(1)#1   | 0.845(18) | 2.01(2)  | 2.846(7) | 170(4)               |
| O(2)-H(2B)...Cl(1)    | 0.830(19) | 2.53(3)  | 3.303(5) | 156(5)               |

Symmetry transformations used to generate equivalent atoms:

#1 -x+1,-y+1,-z+1    #2 x,y-1,z    #3 x-1,y,z    #4 -x+1,-y+1,-z

#5 -x+1,-y+2,-z+1

### 13. Crystal structure of Cu(II)-pincer complex **8**.

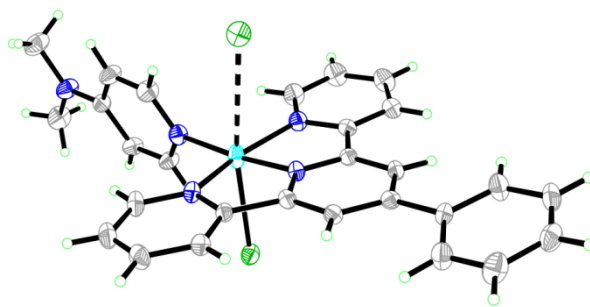

**Figure S11.** Molecular Structure of Complex **8**.

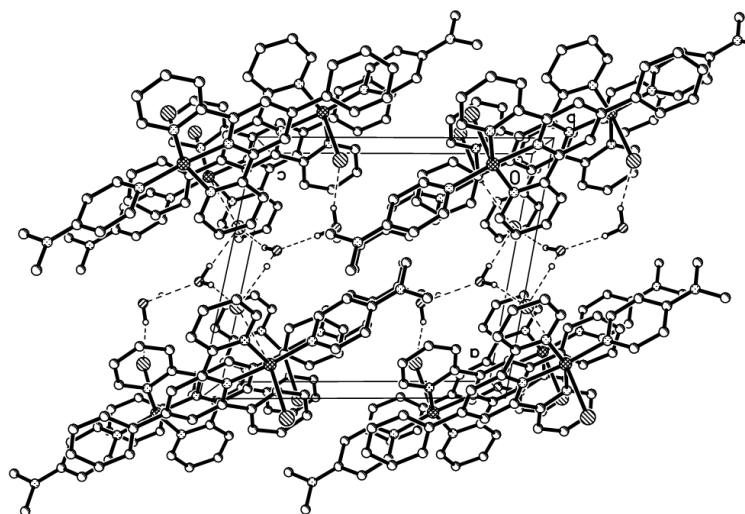

**Figure S12.** Cell unit formed by complex **8**.

**Table S12.** Crystal data and structure refinement for complex **8**.

|                      |                                                                                  |                 |
|----------------------|----------------------------------------------------------------------------------|-----------------|
| Identification code  | complex <b>8</b>                                                                 |                 |
| Empirical formula    | C <sub>28</sub> H <sub>29</sub> Cl <sub>2</sub> Cu N <sub>5</sub> O <sub>2</sub> |                 |
| Formula weight       | 602.00                                                                           |                 |
| Temperature          | 293(2) K                                                                         |                 |
| Wavelength           | 0.71073 Å                                                                        |                 |
| Crystal system       | Triclinic                                                                        |                 |
| Space group          | P -1                                                                             |                 |
| Unit cell dimensions | a = 10.758(4) Å                                                                  | a = 87.424(5) ° |
|                      | b = 10.951(4) Å                                                                  | b = 78.339(5) ° |
|                      | c = 12.045(5) Å                                                                  | g = 79.489(5) ° |
| Volume               | 1366.4(9) Å <sup>3</sup>                                                         |                 |
| Z                    | 2                                                                                |                 |
| Density (calculated) | 1.463 Mg/m <sup>3</sup>                                                          |                 |

|                                   |                                             |
|-----------------------------------|---------------------------------------------|
| Absorption coefficient            | 1.030 mm <sup>-1</sup>                      |
| F(000)                            | 622                                         |
| Crystal size                      | 0.050 x 0.030 x 0.030 mm <sup>3</sup>       |
| Theta range for data collection   | 1.726 to 25.009 °                           |
| Index ranges                      | -12<=h<=12, -12<=k<=13, -11<=l<=14          |
| Reflections collected             | 5731                                        |
| Independent reflections           | 4698 [R(int) = 0.0473]                      |
| Completeness to theta = 25.242 °  | 95.1 %                                      |
| Absorption correction             | Semi-empirical from equivalents             |
| Max. and min. transmission        | 1.000 and 0.365                             |
| Refinement method                 | Full-matrix least-squares on F <sup>2</sup> |
| Data / restraints / parameters    | 4698 / 7 / 361                              |
| Goodness-of-fit on F <sup>2</sup> | 1.007                                       |
| Final R indices [I>2sigma(I)]     | R1 = 0.0705, wR2 = 0.1876                   |
| R indices (all data)              | R1 = 0.0874, wR2 = 0.2032                   |
| Extinction coefficient            | n/a                                         |
| Largest diff. peak and hole       | 1.323 and -1.631 e.Å <sup>-3</sup>          |

**Table S13.** Atomic coordinates ( $\times 10^4$ ) and equivalent isotropic displacement parameters ( $\text{\AA}^2 \times 10^3$ ) for complex

8. U(eq) is defined as one third of the trace of the orthogonalized  $U^{ij}$  tensor.

|       | x        | y       | z       | U(eq) |
|-------|----------|---------|---------|-------|
| Cu(1) | 8840(1)  | 7882(1) | 8020(1) | 42(1) |
| Cl(1) | 10828(1) | 8927(1) | 7050(1) | 42(1) |
| Cl(2) | 3376(1)  | 3408(1) | 381(1)  | 52(1) |
| N(1)  | 9982(4)  | 6211(4) | 7648(3) | 35(1) |
| N(2)  | 9582(3)  | 7599(3) | 9349(3) | 28(1) |
| N(3)  | 7835(4)  | 9362(4) | 8961(3) | 38(1) |
| N(4)  | 7926(4)  | 8099(4) | 6753(3) | 39(1) |
| N(5)  | 5899(4)  | 8598(5) | 4133(4) | 53(1) |
| C(1)  | 10175(5) | 5550(5) | 6696(4) | 46(1) |
| C(2)  | 11075(5) | 4484(5) | 6488(4) | 50(1) |
| C(3)  | 11791(5) | 4083(5) | 7272(5) | 46(1) |
| C(4)  | 11617(5) | 4715(5) | 8273(4) | 39(1) |
| C(5)  | 10717(4) | 5785(4) | 8420(4) | 30(1) |
| C(6)  | 10470(4) | 6612(4) | 9415(4) | 30(1) |

|       |          |          |          |       |
|-------|----------|----------|----------|-------|
| C(7)  | 11065(4) | 6418(4)  | 10330(4) | 33(1) |
| C(8)  | 10748(4) | 7298(4)  | 11193(4) | 32(1) |
| C(9)  | 9819(4)  | 8343(4)  | 11087(4) | 32(1) |
| C(10) | 9239(4)  | 8469(4)  | 10163(4) | 30(1) |
| C(11) | 8222(4)  | 9485(4)  | 9931(4)  | 32(1) |
| C(12) | 7670(5)  | 10451(4) | 10656(4) | 40(1) |
| C(13) | 6651(5)  | 11300(5) | 10385(5) | 50(1) |
| C(14) | 6251(6)  | 11174(5) | 9398(5)  | 55(2) |
| C(15) | 6863(5)  | 10203(5) | 8703(5)  | 49(1) |
| C(16) | 11344(4) | 7090(4)  | 12206(4) | 34(1) |
| C(17) | 10821(6) | 7776(5)  | 13180(4) | 51(1) |
| C(18) | 11331(6) | 7512(6)  | 14152(4) | 57(2) |
| C(19) | 12371(5) | 6597(5)  | 14160(5) | 50(1) |
| C(20) | 12931(6) | 5951(5)  | 13189(5) | 59(2) |
| C(21) | 12428(5) | 6186(5)  | 12224(5) | 51(1) |
| C(22) | 8191(5)  | 8884(5)  | 5904(4)  | 43(1) |
| C(23) | 7553(5)  | 9089(5)  | 5023(4)  | 41(1) |
| C(24) | 6559(5)  | 8435(5)  | 4982(4)  | 40(1) |
| C(25) | 6279(5)  | 7628(5)  | 5881(4)  | 50(1) |
| C(26) | 6969(5)  | 7478(5)  | 6718(4)  | 48(1) |
| C(27) | 4855(6)  | 7962(7)  | 4107(6)  | 69(2) |
| C(28) | 6225(6)  | 9402(6)  | 3189(5)  | 62(2) |
| O(1)  | 5640(5)  | 4382(5)  | 1290(4)  | 71(1) |
| O(2)  | 3449(5)  | 6783(6)  | 6766(5)  | 91(2) |

**Table S14.** Bond lengths [ $\text{\AA}$ ] and angles [ $^\circ$ ] for complex **8**.

|             |            |
|-------------|------------|
| Cu(1)-N(2)  | 1.917(4)   |
| Cu(1)-N(4)  | 1.959(4)   |
| Cu(1)-N(1)  | 2.022(4)   |
| Cu(1)-N(3)  | 2.027(4)   |
| Cu(1)-Cl(1) | 2.6482(15) |
| Cu(1)-Cl(2) | 3.2428(8)  |
| N(1)-C(1)   | 1.343(6)   |
| N(1)-C(5)   | 1.354(6)   |
| N(2)-C(6)   | 1.316(6)   |
| N(2)-C(10)  | 1.347(5)   |
| N(3)-C(11)  | 1.338(6)   |
| N(3)-C(15)  | 1.339(6)   |
| N(4)-C(22)  | 1.326(6)   |
| N(4)-C(26)  | 1.343(7)   |
| N(5)-C(24)  | 1.347(6)   |
| N(5)-C(27)  | 1.432(7)   |

|             |          |
|-------------|----------|
| N(5)-C(28)  | 1.432(7) |
| C(1)-C(2)   | 1.371(7) |
| C(1)-H(1)   | 0.9300   |
| C(2)-C(3)   | 1.345(8) |
| C(2)-H(2)   | 0.9300   |
| C(3)-C(4)   | 1.380(7) |
| C(3)-H(3)   | 0.9300   |
| C(4)-C(5)   | 1.370(7) |
| C(4)-H(4)   | 0.9300   |
| C(5)-C(6)   | 1.486(6) |
| C(6)-C(7)   | 1.373(6) |
| C(7)-C(8)   | 1.398(6) |
| C(7)-H(7)   | 0.9300   |
| C(8)-C(9)   | 1.395(6) |
| C(8)-C(16)  | 1.480(6) |
| C(9)-C(10)  | 1.372(6) |
| C(9)-H(9)   | 0.9300   |
| C(10)-C(11) | 1.471(6) |
| C(11)-C(12) | 1.371(6) |
| C(12)-C(13) | 1.385(7) |
| C(12)-H(12) | 0.9300   |
| C(13)-C(14) | 1.365(8) |
| C(13)-H(13) | 0.9300   |
| C(14)-C(15) | 1.366(7) |
| C(14)-H(14) | 0.9300   |
| C(15)-H(15) | 0.9300   |
| C(16)-C(17) | 1.384(6) |
| C(16)-C(21) | 1.389(7) |
| C(17)-C(18) | 1.388(7) |
| C(17)-H(17) | 0.9300   |
| C(18)-C(19) | 1.361(8) |
| C(18)-H(18) | 0.9300   |
| C(19)-C(20) | 1.365(8) |
| C(19)-H(19) | 0.9300   |
| C(20)-C(21) | 1.374(7) |
| C(20)-H(20) | 0.9300   |
| C(21)-H(21) | 0.9300   |
| C(22)-C(23) | 1.366(7) |
| C(22)-H(22) | 0.9300   |
| C(23)-C(24) | 1.402(7) |
| C(23)-H(23) | 0.9300   |
| C(24)-C(25) | 1.386(7) |
| C(25)-C(26) | 1.355(7) |
| C(25)-H(25) | 0.9300   |

|                  |            |
|------------------|------------|
| C(26)-H(26)      | 0.9300     |
| C(27)-H(27A)     | 0.9600     |
| C(27)-H(27B)     | 0.9600     |
| C(27)-H(27C)     | 0.9600     |
| C(28)-H(28A)     | 0.9600     |
| C(28)-H(28B)     | 0.9600     |
| C(28)-H(28C)     | 0.9600     |
| O(1)-H(1A)       | 0.86(4)    |
| O(1)-H(1B)       | 0.96(4)    |
| O(2)-H(2A)       | 0.82(4)    |
| O(2)-H(2B)       | 0.87(4)    |
|                  |            |
| N(2)-Cu(1)-N(4)  | 173.98(16) |
| N(2)-Cu(1)-N(1)  | 79.68(15)  |
| N(4)-Cu(1)-N(1)  | 100.85(16) |
| N(2)-Cu(1)-N(3)  | 79.96(15)  |
| N(4)-Cu(1)-N(3)  | 98.82(16)  |
| N(1)-Cu(1)-N(3)  | 158.89(16) |
| N(2)-Cu(1)-Cl(1) | 88.51(11)  |
| N(4)-Cu(1)-Cl(1) | 97.50(13)  |
| N(1)-Cu(1)-Cl(1) | 87.95(12)  |
| N(3)-Cu(1)-Cl(1) | 97.03(12)  |
| C(1)-N(1)-C(5)   | 117.4(4)   |
| C(1)-N(1)-Cu(1)  | 127.9(4)   |
| C(5)-N(1)-Cu(1)  | 114.4(3)   |
| C(6)-N(2)-C(10)  | 121.5(4)   |
| C(6)-N(2)-Cu(1)  | 119.9(3)   |
| C(10)-N(2)-Cu(1) | 118.5(3)   |
| C(11)-N(3)-C(15) | 118.6(4)   |
| C(11)-N(3)-Cu(1) | 114.4(3)   |
| C(15)-N(3)-Cu(1) | 127.0(3)   |
| C(22)-N(4)-C(26) | 116.4(4)   |
| C(22)-N(4)-Cu(1) | 122.3(3)   |
| C(26)-N(4)-Cu(1) | 121.3(3)   |
| C(24)-N(5)-C(27) | 122.1(5)   |
| C(24)-N(5)-C(28) | 121.6(5)   |
| C(27)-N(5)-C(28) | 116.2(5)   |
| N(1)-C(1)-C(2)   | 122.7(5)   |
| N(1)-C(1)-H(1)   | 118.7      |
| C(2)-C(1)-H(1)   | 118.7      |
| C(3)-C(2)-C(1)   | 118.6(5)   |
| C(3)-C(2)-H(2)   | 120.7      |
| C(1)-C(2)-H(2)   | 120.7      |
| C(2)-C(3)-C(4)   | 121.1(5)   |

|                   |          |
|-------------------|----------|
| C(2)-C(3)-H(3)    | 119.4    |
| C(4)-C(3)-H(3)    | 119.4    |
| C(5)-C(4)-C(3)    | 117.4(5) |
| C(5)-C(4)-H(4)    | 121.3    |
| C(3)-C(4)-H(4)    | 121.3    |
| N(1)-C(5)-C(4)    | 122.8(4) |
| N(1)-C(5)-C(6)    | 113.1(4) |
| C(4)-C(5)-C(6)    | 124.1(4) |
| N(2)-C(6)-C(7)    | 121.2(4) |
| N(2)-C(6)-C(5)    | 112.7(4) |
| C(7)-C(6)-C(5)    | 126.1(4) |
| C(6)-C(7)-C(8)    | 119.5(4) |
| C(6)-C(7)-H(7)    | 120.3    |
| C(8)-C(7)-H(7)    | 120.3    |
| C(9)-C(8)-C(7)    | 117.8(4) |
| C(9)-C(8)-C(16)   | 121.6(4) |
| C(7)-C(8)-C(16)   | 120.5(4) |
| C(10)-C(9)-C(8)   | 119.8(4) |
| C(10)-C(9)-H(9)   | 120.1    |
| C(8)-C(9)-H(9)    | 120.1    |
| N(2)-C(10)-C(9)   | 120.2(4) |
| N(2)-C(10)-C(11)  | 112.8(4) |
| C(9)-C(10)-C(11)  | 127.1(4) |
| N(3)-C(11)-C(12)  | 122.2(4) |
| N(3)-C(11)-C(10)  | 114.0(4) |
| C(12)-C(11)-C(10) | 123.8(4) |
| C(11)-C(12)-C(13) | 118.4(5) |
| C(11)-C(12)-H(12) | 120.8    |
| C(13)-C(12)-H(12) | 120.8    |
| C(14)-C(13)-C(12) | 119.6(5) |
| C(14)-C(13)-H(13) | 120.2    |
| C(12)-C(13)-H(13) | 120.2    |
| C(13)-C(14)-C(15) | 118.9(5) |
| C(13)-C(14)-H(14) | 120.5    |
| C(15)-C(14)-H(14) | 120.5    |
| N(3)-C(15)-C(14)  | 122.4(5) |
| N(3)-C(15)-H(15)  | 118.8    |
| C(14)-C(15)-H(15) | 118.8    |
| C(17)-C(16)-C(21) | 117.6(4) |
| C(17)-C(16)-C(8)  | 121.0(4) |
| C(21)-C(16)-C(8)  | 121.4(4) |
| C(16)-C(17)-C(18) | 120.5(5) |
| C(16)-C(17)-H(17) | 119.8    |
| C(18)-C(17)-H(17) | 119.8    |



|                     |          |
|---------------------|----------|
| C(19)-C(18)-C(17)   | 120.8(5) |
| C(19)-C(18)-H(18)   | 119.6    |
| C(17)-C(18)-H(18)   | 119.6    |
| C(18)-C(19)-C(20)   | 119.2(5) |
| C(18)-C(19)-H(19)   | 120.4    |
| C(20)-C(19)-H(19)   | 120.4    |
| C(19)-C(20)-C(21)   | 120.8(5) |
| C(19)-C(20)-H(20)   | 119.6    |
| C(21)-C(20)-H(20)   | 119.6    |
| C(20)-C(21)-C(16)   | 121.0(5) |
| C(20)-C(21)-H(21)   | 119.5    |
| C(16)-C(21)-H(21)   | 119.5    |
| N(4)-C(22)-C(23)    | 124.1(5) |
| N(4)-C(22)-H(22)    | 117.9    |
| C(23)-C(22)-H(22)   | 117.9    |
| C(22)-C(23)-C(24)   | 119.5(5) |
| C(22)-C(23)-H(23)   | 120.3    |
| C(24)-C(23)-H(23)   | 120.3    |
| N(5)-C(24)-C(25)    | 122.1(5) |
| N(5)-C(24)-C(23)    | 122.0(5) |
| C(25)-C(24)-C(23)   | 115.9(4) |
| C(26)-C(25)-C(24)   | 120.6(5) |
| C(26)-C(25)-H(25)   | 119.7    |
| C(24)-C(25)-H(25)   | 119.7    |
| N(4)-C(26)-C(25)    | 123.5(5) |
| N(4)-C(26)-H(26)    | 118.3    |
| C(25)-C(26)-H(26)   | 118.3    |
| N(5)-C(27)-H(27A)   | 109.5    |
| N(5)-C(27)-H(27B)   | 109.5    |
| H(27A)-C(27)-H(27B) | 109.5    |
| N(5)-C(27)-H(27C)   | 109.5    |
| H(27A)-C(27)-H(27C) | 109.5    |
| H(27B)-C(27)-H(27C) | 109.5    |
| N(5)-C(28)-H(28A)   | 109.5    |
| N(5)-C(28)-H(28B)   | 109.5    |
| H(28A)-C(28)-H(28B) | 109.5    |
| N(5)-C(28)-H(28C)   | 109.5    |
| H(28A)-C(28)-H(28C) | 109.5    |
| H(28B)-C(28)-H(28C) | 109.5    |
| H(1A)-O(1)-H(1B)    | 99(4)    |
| H(2A)-O(2)-H(2B)    | 104(6)   |

---

Symmetry transformations used to generate equivalent atoms:

**Table S15.** Anisotropic displacement parameters ( $\text{\AA}^2 \times 10^3$ ) for complex **8**. The anisotropic displacement factor

exponent takes the form:  $-2p^2[ h^2 a^{*2}U^{11} + \dots + 2 h k a^* b^* U^{12} ]$

|       | U <sup>11</sup> | U <sup>22</sup> | U <sup>33</sup> | U <sup>23</sup> | U <sup>13</sup> | U <sup>12</sup> |
|-------|-----------------|-----------------|-----------------|-----------------|-----------------|-----------------|
| Cu(1) | 55(1)           | 36(1)           | 36(1)           | -6(1)           | -20(1)          | 3(1)            |
| Cl(1) | 50(1)           | 43(1)           | 38(1)           | 1(1)            | -11(1)          | -17(1)          |
| Cl(2) | 55(1)           | 42(1)           | 58(1)           | 4(1)            | -17(1)          | -2(1)           |
| N(1)  | 43(2)           | 30(2)           | 33(2)           | -2(2)           | -11(2)          | -9(2)           |
| N(2)  | 38(2)           | 18(2)           | 28(2)           | 1(2)            | -8(2)           | -2(2)           |
| N(3)  | 40(2)           | 37(2)           | 36(2)           | 0(2)            | -10(2)          | -4(2)           |
| N(4)  | 43(2)           | 40(2)           | 35(2)           | 2(2)            | -12(2)          | -5(2)           |
| N(5)  | 53(3)           | 77(3)           | 40(2)           | 15(2)           | -23(2)          | -25(2)          |
| C(1)  | 65(3)           | 41(3)           | 35(3)           | -6(2)           | -13(2)          | -13(3)          |
| C(2)  | 63(4)           | 45(3)           | 42(3)           | -15(3)          | -8(2)           | -10(3)          |
| C(3)  | 54(3)           | 28(3)           | 52(3)           | -10(2)          | -4(2)           | 0(2)            |
| C(4)  | 40(3)           | 37(3)           | 41(3)           | -5(2)           | -7(2)           | -8(2)           |
| C(5)  | 36(2)           | 29(2)           | 28(2)           | 0(2)            | -4(2)           | -11(2)          |
| C(6)  | 38(2)           | 24(2)           | 28(2)           | 1(2)            | -2(2)           | -8(2)           |
| C(7)  | 33(2)           | 34(3)           | 30(2)           | 1(2)            | -7(2)           | -3(2)           |
| C(8)  | 34(2)           | 33(3)           | 30(2)           | 5(2)            | -6(2)           | -8(2)           |
| C(9)  | 38(2)           | 31(3)           | 27(2)           | -3(2)           | -4(2)           | -7(2)           |
| C(10) | 34(2)           | 28(2)           | 30(2)           | 0(2)            | -4(2)           | -8(2)           |
| C(11) | 32(2)           | 28(2)           | 33(2)           | 3(2)            | -4(2)           | -4(2)           |
| C(12) | 46(3)           | 34(3)           | 37(3)           | 3(2)            | -7(2)           | -4(2)           |
| C(13) | 57(3)           | 31(3)           | 52(3)           | -2(2)           | -7(3)           | 10(2)           |
| C(14) | 54(3)           | 44(3)           | 61(4)           | 1(3)            | -15(3)          | 12(3)           |
| C(15) | 47(3)           | 50(3)           | 47(3)           | 1(3)            | -18(2)          | 5(2)            |
| C(16) | 41(3)           | 32(3)           | 31(2)           | 0(2)            | -13(2)          | -9(2)           |
| C(17) | 60(3)           | 50(3)           | 40(3)           | -10(3)          | -15(2)          | 5(3)            |
| C(18) | 66(4)           | 74(4)           | 33(3)           | -11(3)          | -15(3)          | -11(3)          |
| C(19) | 62(4)           | 54(4)           | 43(3)           | 9(3)            | -25(3)          | -18(3)          |
| C(20) | 70(4)           | 47(3)           | 64(4)           | 3(3)            | -34(3)          | -2(3)           |
| C(21) | 57(3)           | 49(3)           | 47(3)           | -9(3)           | -20(3)          | 3(3)            |
| C(22) | 37(3)           | 49(3)           | 48(3)           | 4(3)            | -15(2)          | -12(2)          |
| C(23) | 39(3)           | 46(3)           | 39(3)           | 13(2)           | -12(2)          | -11(2)          |
| C(24) | 37(3)           | 46(3)           | 40(3)           | -3(2)           | -10(2)          | -7(2)           |
| C(25) | 52(3)           | 65(4)           | 43(3)           | 13(3)           | -16(2)          | -31(3)          |
| C(26) | 57(3)           | 53(3)           | 37(3)           | 15(2)           | -13(2)          | -18(3)          |
| C(27) | 61(4)           | 92(5)           | 68(4)           | 12(4)           | -35(3)          | -31(3)          |
| C(28) | 73(4)           | 70(4)           | 48(3)           | 22(3)           | -27(3)          | -18(3)          |
| O(1)  | 67(3)           | 75(3)           | 77(3)           | 18(3)           | -26(2)          | -17(2)          |
| O(2)  | 60(3)           | 135(5)          | 71(4)           | 34(3)           | -5(3)           | -19(3)          |

**Table S16.** Hydrogen coordinates ( $\times 10^4$ ) and isotropic displacement parameters ( $\text{\AA}^2 \times 10^3$ ) for complex **8**.

|        | x        | y         | z        | U(eq)   |
|--------|----------|-----------|----------|---------|
| H(1)   | 9677     | 5827      | 6156     | 55      |
| H(2)   | 11188    | 4047      | 5820     | 60      |
| H(3)   | 12413    | 3367      | 7137     | 55      |
| H(4)   | 12093    | 4426      | 8825     | 47      |
| H(7)   | 11675    | 5706      | 10375    | 39      |
| H(9)   | 9593     | 8952      | 11641    | 39      |
| H(12)  | 7973     | 10535     | 11315    | 48      |
| H(13)  | 6243     | 11951     | 10872    | 59      |
| H(14)  | 5573     | 11741     | 9201     | 66      |
| H(15)  | 6594     | 10123     | 8027     | 58      |
| H(17)  | 10123    | 8418      | 13184    | 61      |
| H(18)  | 10957    | 7967      | 14806    | 68      |
| H(19)  | 12697    | 6413      | 14819    | 60      |
| H(20)  | 13661    | 5344      | 13181    | 70      |
| H(21)  | 12820    | 5733      | 11572    | 61      |
| H(22)  | 8853     | 9323      | 5909     | 52      |
| H(23)  | 7777     | 9658      | 4455     | 49      |
| H(25)  | 5613     | 7186      | 5910     | 60      |
| H(26)  | 6769     | 6914      | 7298     | 57      |
| H(27A) | 5132     | 7086      | 4202     | 103     |
| H(27B) | 4587     | 8116      | 3392     | 103     |
| H(27C) | 4145     | 8257      | 4710     | 103     |
| H(28A) | 5758     | 10228     | 3357     | 92      |
| H(28B) | 6002     | 9106      | 2530     | 92      |
| H(28C) | 7135     | 9410      | 3047     | 92      |
| H(1A)  | 4990(50) | 4180(60)  | 1070(60) | 90(30)  |
| H(1B)  | 5760(60) | 5080(50)  | 800(50)  | 80(20)  |
| H(2A)  | 2660(40) | 6970(70)  | 6990(60) | 100(30) |
| H(2B)  | 3780(70) | 6880(100) | 7350(60) | 140(40) |

**Table S17.** Torsion angles [ $^\circ$ ] for complex **8**.

|                      |          |
|----------------------|----------|
| C(5)-N(1)-C(1)-C(2)  | -0.2(7)  |
| Cu(1)-N(1)-C(1)-C(2) | 173.1(4) |
| N(1)-C(1)-C(2)-C(3)  | 0.2(8)   |

|                         |           |
|-------------------------|-----------|
| C(1)-C(2)-C(3)-C(4)     | 0.9(8)    |
| C(2)-C(3)-C(4)-C(5)     | -2.0(8)   |
| C(1)-N(1)-C(5)-C(4)     | -1.0(7)   |
| Cu(1)-N(1)-C(5)-C(4)    | -175.2(3) |
| C(1)-N(1)-C(5)-C(6)     | 177.4(4)  |
| Cu(1)-N(1)-C(5)-C(6)    | 3.2(5)    |
| C(3)-C(4)-C(5)-N(1)     | 2.0(7)    |
| C(3)-C(4)-C(5)-C(6)     | -176.2(4) |
| C(10)-N(2)-C(6)-C(7)    | 1.2(6)    |
| Cu(1)-N(2)-C(6)-C(7)    | 176.7(3)  |
| C(10)-N(2)-C(6)-C(5)    | -179.0(4) |
| Cu(1)-N(2)-C(6)-C(5)    | -3.5(5)   |
| N(1)-C(5)-C(6)-N(2)     | 0.0(5)    |
| C(4)-C(5)-C(6)-N(2)     | 178.3(4)  |
| N(1)-C(5)-C(6)-C(7)     | 179.8(4)  |
| C(4)-C(5)-C(6)-C(7)     | -1.9(7)   |
| N(2)-C(6)-C(7)-C(8)     | -1.6(7)   |
| C(5)-C(6)-C(7)-C(8)     | 178.6(4)  |
| C(6)-C(7)-C(8)-C(9)     | 0.6(6)    |
| C(6)-C(7)-C(8)-C(16)    | 177.9(4)  |
| C(7)-C(8)-C(9)-C(10)    | 0.8(6)    |
| C(16)-C(8)-C(9)-C(10)   | -176.5(4) |
| C(6)-N(2)-C(10)-C(9)    | 0.2(6)    |
| Cu(1)-N(2)-C(10)-C(9)   | -175.3(3) |
| C(6)-N(2)-C(10)-C(11)   | -179.3(4) |
| Cu(1)-N(2)-C(10)-C(11)  | 5.2(5)    |
| C(8)-C(9)-C(10)-N(2)    | -1.2(6)   |
| C(8)-C(9)-C(10)-C(11)   | 178.2(4)  |
| C(15)-N(3)-C(11)-C(12)  | -1.1(7)   |
| Cu(1)-N(3)-C(11)-C(12)  | 178.3(3)  |
| C(15)-N(3)-C(11)-C(10)  | 176.4(4)  |
| Cu(1)-N(3)-C(11)-C(10)  | -4.2(5)   |
| N(2)-C(10)-C(11)-N(3)   | -0.4(5)   |
| C(9)-C(10)-C(11)-N(3)   | -179.8(4) |
| N(2)-C(10)-C(11)-C(12)  | 177.0(4)  |
| C(9)-C(10)-C(11)-C(12)  | -2.4(7)   |
| N(3)-C(11)-C(12)-C(13)  | 2.2(7)    |
| C(10)-C(11)-C(12)-C(13) | -175.0(4) |
| C(11)-C(12)-C(13)-C(14) | -1.9(8)   |
| C(12)-C(13)-C(14)-C(15) | 0.5(9)    |
| C(11)-N(3)-C(15)-C(14)  | -0.3(8)   |
| Cu(1)-N(3)-C(15)-C(14)  | -179.7(4) |
| C(13)-C(14)-C(15)-N(3)  | 0.6(9)    |
| C(9)-C(8)-C(16)-C(17)   | 13.5(7)   |

|                         |           |
|-------------------------|-----------|
| C(7)-C(8)-C(16)-C(17)   | -163.7(5) |
| C(9)-C(8)-C(16)-C(21)   | -167.8(5) |
| C(7)-C(8)-C(16)-C(21)   | 15.0(7)   |
| C(21)-C(16)-C(17)-C(18) | -3.4(8)   |
| C(8)-C(16)-C(17)-C(18)  | 175.3(5)  |
| C(16)-C(17)-C(18)-C(19) | 1.6(9)    |
| C(17)-C(18)-C(19)-C(20) | 1.4(9)    |
| C(18)-C(19)-C(20)-C(21) | -2.3(9)   |
| C(19)-C(20)-C(21)-C(16) | 0.4(9)    |
| C(17)-C(16)-C(21)-C(20) | 2.5(8)    |
| C(8)-C(16)-C(21)-C(20)  | -176.2(5) |
| C(26)-N(4)-C(22)-C(23)  | 0.3(8)    |
| Cu(1)-N(4)-C(22)-C(23)  | -178.0(4) |
| N(4)-C(22)-C(23)-C(24)  | -0.7(8)   |
| C(27)-N(5)-C(24)-C(25)  | 0.7(9)    |
| C(28)-N(5)-C(24)-C(25)  | -177.8(5) |
| C(27)-N(5)-C(24)-C(23)  | -177.9(5) |
| C(28)-N(5)-C(24)-C(23)  | 3.5(8)    |
| C(22)-C(23)-C(24)-N(5)  | -179.9(5) |
| C(22)-C(23)-C(24)-C(25) | 1.4(7)    |
| N(5)-C(24)-C(25)-C(26)  | 179.5(5)  |
| C(23)-C(24)-C(25)-C(26) | -1.8(8)   |
| C(22)-N(4)-C(26)-C(25)  | -0.7(8)   |
| Cu(1)-N(4)-C(26)-C(25)  | 177.6(4)  |
| C(24)-C(25)-C(26)-N(4)  | 1.5(9)    |

---

Symmetry transformations used to generate equivalent atoms:

**Table S18.** Hydrogen bonds for complex **8** [ $\text{\AA}$  and  $^\circ$ ].

| D-H...A               | d(D-H)  | d(H...A) | d(D...A) | $\angle(\text{DHA})$ |
|-----------------------|---------|----------|----------|----------------------|
| O(2)-H(2B)...O(1)#1   | 0.87(4) | 2.21(8)  | 2.877(7) | 133(9)               |
| O(2)-H(2A)...Cl(1)#2  | 0.82(4) | 2.63(6)  | 3.293(6) | 139(7)               |
| O(1)-H(1B)...Cl(2)#3  | 0.96(4) | 2.33(4)  | 3.265(5) | 165(5)               |
| O(1)-H(1A)...Cl(2)    | 0.86(4) | 2.37(4)  | 3.225(5) | 173(6)               |
| C(25)-H(25)...O(2)    | 0.93    | 2.46     | 3.300(8) | 150.7                |
| C(23)-H(23)...Cl(1)#4 | 0.93    | 2.73     | 3.623(5) | 162.0                |
| C(12)-H(12)...Cl(1)#5 | 0.93    | 2.70     | 3.616(5) | 168.0                |
| C(9)-H(9)...Cl(1)#5   | 0.93    | 2.78     | 3.697(5) | 168.1                |
| C(7)-H(7)...Cl(2)#6   | 0.93    | 2.83     | 3.755(5) | 173.8                |
| C(4)-H(4)...Cl(2)#6   | 0.93    | 2.64     | 3.565(5) | 174.8                |

---

Symmetry transformations used to generate equivalent atoms:

#1 -x+1,-y+1,-z+1    #2 x-1,y,z    #3 -x+1,-y+1,-z    #4 -x+2,-y+2,-z+1    #5 -x+2,-y+2,-z+2    #6 x+1,y,z+1

#### 14. Crystal structure of Cu(II)-pincer complex **10**.

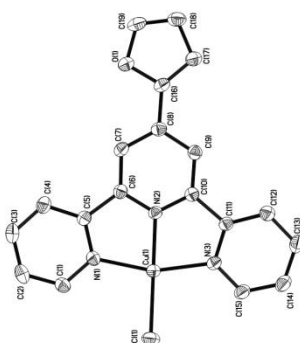

**Figure S13.** Molecular Structure of complex **10**.

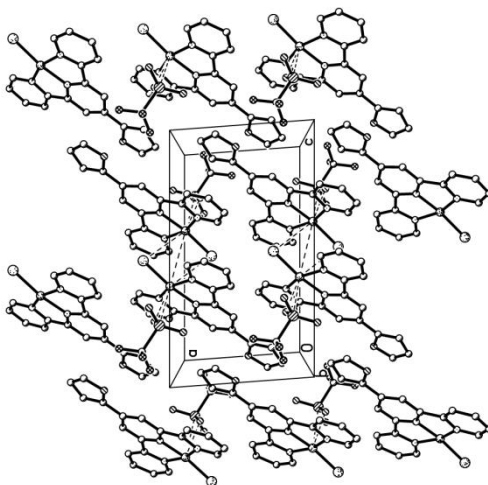

**Figure S14.** Cell unit formed by complex **10**.

**Table S19.** Crystal data and structure refinement for complex **10**.

|                     |                                                                                      |
|---------------------|--------------------------------------------------------------------------------------|
| Identification code | complex <b>10</b>                                                                    |
| Empirical formula   | C <sub>20</sub> H <sub>13</sub> Cl Cu F <sub>3</sub> N <sub>3</sub> O <sub>4</sub> S |
| Formula weight      | 547.38                                                                               |
| Temperature         | 293(2) K                                                                             |

|                                   |                                                                                                                     |
|-----------------------------------|---------------------------------------------------------------------------------------------------------------------|
| Wavelength                        | 0.71073 Å                                                                                                           |
| Crystal system, space group       | Monoclinic, P 21/c                                                                                                  |
| Unit cell dimensions              | a = 7.590(3) Å    alpha = 90 deg.<br>b = 20.098(7) Å    beta = 94.218(4) deg.<br>c = 13.487(5) Å    gamma = 90 deg. |
| Volume                            | 2051.9(12) Å <sup>3</sup>                                                                                           |
| Z, Calculated density             | 4, 1.772 Mg/m <sup>3</sup>                                                                                          |
| Absorption coefficient            | 1.359 mm <sup>-1</sup>                                                                                              |
| F(000)                            | 1100                                                                                                                |
| Crystal size                      | 0.250 x 0.200 x 0.200 mm                                                                                            |
| Theta range for data collection   | 1.822 to 25.996 deg.                                                                                                |
| Limiting indices                  | -9<=h<=8, -24<=k<=17, -16<=l<=15                                                                                    |
| Reflections collected / unique    | 9055 / 3971 [R(int) = 0.0430]                                                                                       |
| Completeness to theta = 25.242    | 99.1 %                                                                                                              |
| Absorption correction             | Multi-scan                                                                                                          |
| Max. and min. transmission        | 1.000 and 0.199                                                                                                     |
| Refinement method                 | Full-matrix least-squares on F <sup>2</sup>                                                                         |
| Data / restraints / parameters    | 3971 / 0 / 298                                                                                                      |
| Goodness-of-fit on F <sup>2</sup> | 0.914                                                                                                               |
| Final R indices [I>2sigma(I)]     | R1 = 0.0377, wR2 = 0.0891                                                                                           |
| R indices (all data)              | R1 = 0.0548, wR2 = 0.0935                                                                                           |
| Extinction coefficient            | n/a                                                                                                                 |
| Largest diff. peak and hole       | 0.503 and -0.586 e.Å <sup>-3</sup>                                                                                  |

**Table S20.** Atomic coordinates ( $\times 10^4$ ) and equivalent isotropic displacement parameters ( $\text{Å}^2 \times 10^3$ ) for complex **10**.  $U(\text{eq})$  is defined as one third of the trace of the orthogonalized  $U_{ij}$  tensor.

|       | x        | y       | z       | $U(\text{eq})$ |
|-------|----------|---------|---------|----------------|
| Cu(1) | 10555(1) | 5381(1) | 3810(1) | 39(1)          |
| Cl(1) | 12594(1) | 5607(1) | 5004(1) | 54(1)          |
| N(1)  | 11544(3) | 4523(1) | 3304(2) | 38(1)          |
| N(2)  | 8584(3)  | 5094(1) | 2935(2) | 34(1)          |
| N(3)  | 8809(3)  | 6109(1) | 4058(2) | 37(1)          |
| S(1)  | 8816(1)  | 1779(1) | 2763(1) | 46(1)          |
| O(1)  | 4503(3)  | 3962(1) | 413(2)  | 51(1)          |
| O(2)  | 8348(3)  | 1088(1) | 2632(2) | 55(1)          |
| O(3)  | 8116(4)  | 2205(1) | 1969(2) | 69(1)          |
| O(4)  | 10614(3) | 1900(1) | 3116(2) | 59(1)          |
| F(1)  | 7722(3)  | 2684(1) | 3951(2) | 109(1)         |
| F(2)  | 5839(3)  | 1924(1) | 3600(2) | 97(1)          |
| F(3)  | 8101(4)  | 1707(2) | 4615(2) | 118(1)         |
| C(1)  | 13132(4) | 4261(2) | 3560(2) | 44(1)          |

|       |          |         |         |       |
|-------|----------|---------|---------|-------|
| C(2)  | 13657(5) | 3656(2) | 3208(2) | 52(1) |
| C(3)  | 12495(5) | 3301(2) | 2578(2) | 52(1) |
| C(4)  | 10855(4) | 3564(2) | 2305(2) | 47(1) |
| C(5)  | 10408(4) | 4180(1) | 2665(2) | 37(1) |
| C(6)  | 8711(4)  | 4524(1) | 2424(2) | 37(1) |
| C(7)  | 7312(4)  | 4312(1) | 1786(2) | 41(1) |
| C(8)  | 5776(4)  | 4694(1) | 1680(2) | 39(1) |
| C(9)  | 5661(4)  | 5269(1) | 2263(2) | 39(1) |
| C(10) | 7094(4)  | 5456(1) | 2882(2) | 35(1) |
| C(11) | 7217(4)  | 6040(1) | 3550(2) | 36(1) |
| C(12) | 5857(4)  | 6479(2) | 3669(2) | 44(1) |
| C(13) | 6153(5)  | 7020(2) | 4298(2) | 52(1) |
| C(14) | 7805(5)  | 7096(2) | 4785(2) | 54(1) |
| C(15) | 9094(5)  | 6633(2) | 4657(2) | 47(1) |
| C(16) | 4295(4)  | 4514(1) | 995(2)  | 41(1) |
| C(17) | 2697(4)  | 4783(2) | 772(2)  | 49(1) |
| C(18) | 1848(5)  | 4384(2) | 12(2)   | 54(1) |
| C(19) | 2968(5)  | 3906(2) | -173(2) | 53(1) |
| C(23) | 7555(5)  | 2030(2) | 3790(3) | 69(1) |

**Table S21.** Bond lengths [Å] and angles [deg] for complex **10**.

|             |            |
|-------------|------------|
| Cu(1)-N(2)  | 1.925(2)   |
| Cu(1)-N(3)  | 2.017(2)   |
| Cu(1)-N(1)  | 2.020(2)   |
| Cu(1)-Cl(1) | 2.1979(10) |
| N(1)-C(1)   | 1.337(4)   |
| N(1)-C(5)   | 1.360(4)   |
| N(2)-C(6)   | 1.342(3)   |
| N(2)-C(10)  | 1.343(4)   |
| N(3)-C(15)  | 1.336(3)   |
| N(3)-C(11)  | 1.351(4)   |
| S(1)-O(4)   | 1.433(2)   |
| S(1)-O(3)   | 1.441(2)   |
| S(1)-O(2)   | 1.441(2)   |
| S(1)-C(23)  | 1.812(4)   |
| O(1)-C(19)  | 1.363(4)   |
| O(1)-C(16)  | 1.374(3)   |
| F(1)-C(23)  | 1.337(4)   |
| F(2)-C(23)  | 1.326(4)   |
| F(3)-C(23)  | 1.328(5)   |
| C(1)-C(2)   | 1.376(4)   |
| C(2)-C(3)   | 1.378(5)   |



|             |          |
|-------------|----------|
| C(3)-C(4)   | 1.376(4) |
| C(4)-C(5)   | 1.383(4) |
| C(5)-C(6)   | 1.477(4) |
| C(6)-C(7)   | 1.384(4) |
| C(7)-C(8)   | 1.393(4) |
| C(8)-C(9)   | 1.405(4) |
| C(8)-C(16)  | 1.448(4) |
| C(9)-C(10)  | 1.374(4) |
| C(10)-C(11) | 1.478(4) |
| C(11)-C(12) | 1.377(4) |
| C(12)-C(13) | 1.387(4) |
| C(13)-C(14) | 1.381(5) |
| C(14)-C(15) | 1.371(4) |
| C(16)-C(17) | 1.342(4) |
| C(17)-C(18) | 1.418(4) |
| C(18)-C(19) | 1.320(5) |

|                  |            |
|------------------|------------|
| N(2)-Cu(1)-N(3)  | 80.17(10)  |
| N(2)-Cu(1)-N(1)  | 80.07(10)  |
| N(3)-Cu(1)-N(1)  | 160.02(10) |
| N(2)-Cu(1)-Cl(1) | 170.11(7)  |
| N(3)-Cu(1)-Cl(1) | 99.47(7)   |
| N(1)-Cu(1)-Cl(1) | 99.48(7)   |
| C(1)-N(1)-C(5)   | 118.8(3)   |
| C(1)-N(1)-Cu(1)  | 126.8(2)   |
| C(5)-N(1)-Cu(1)  | 114.3(2)   |
| C(6)-N(2)-C(10)  | 121.8(2)   |
| C(6)-N(2)-Cu(1)  | 119.27(19) |
| C(10)-N(2)-Cu(1) | 118.89(19) |
| C(15)-N(3)-C(11) | 119.1(3)   |
| C(15)-N(3)-Cu(1) | 126.4(2)   |
| C(11)-N(3)-Cu(1) | 114.53(18) |
| O(4)-S(1)-O(3)   | 115.87(15) |
| O(4)-S(1)-O(2)   | 115.08(14) |
| O(3)-S(1)-O(2)   | 114.03(14) |
| O(4)-S(1)-C(23)  | 104.02(16) |
| O(3)-S(1)-C(23)  | 102.51(19) |
| O(2)-S(1)-C(23)  | 102.86(17) |
| C(19)-O(1)-C(16) | 105.6(2)   |
| N(1)-C(1)-C(2)   | 122.5(3)   |
| C(3)-C(2)-C(1)   | 118.8(3)   |
| C(4)-C(3)-C(2)   | 119.5(3)   |
| C(3)-C(4)-C(5)   | 119.4(3)   |
| N(1)-C(5)-C(4)   | 121.0(3)   |

|                   |          |
|-------------------|----------|
| N(1)-C(5)-C(6)    | 113.8(2) |
| C(4)-C(5)-C(6)    | 125.1(3) |
| N(2)-C(6)-C(7)    | 120.0(3) |
| N(2)-C(6)-C(5)    | 112.4(2) |
| C(7)-C(6)-C(5)    | 127.6(3) |
| C(6)-C(7)-C(8)    | 119.5(3) |
| C(7)-C(8)-C(9)    | 118.7(3) |
| C(7)-C(8)-C(16)   | 122.2(3) |
| C(9)-C(8)-C(16)   | 119.1(3) |
| C(10)-C(9)-C(8)   | 119.1(3) |
| N(2)-C(10)-C(9)   | 120.7(3) |
| N(2)-C(10)-C(11)  | 112.5(2) |
| C(9)-C(10)-C(11)  | 126.8(3) |
| N(3)-C(11)-C(12)  | 121.7(3) |
| N(3)-C(11)-C(10)  | 113.9(2) |
| C(12)-C(11)-C(10) | 124.5(3) |
| C(11)-C(12)-C(13) | 119.0(3) |
| C(14)-C(13)-C(12) | 118.6(3) |
| C(15)-C(14)-C(13) | 119.7(3) |
| N(3)-C(15)-C(14)  | 121.8(3) |
| C(17)-C(16)-O(1)  | 109.7(3) |
| C(17)-C(16)-C(8)  | 133.5(3) |
| O(1)-C(16)-C(8)   | 116.8(3) |
| C(16)-C(17)-C(18) | 106.8(3) |
| C(19)-C(18)-C(17) | 106.5(3) |
| C(18)-C(19)-O(1)  | 111.4(3) |
| F(2)-C(23)-F(3)   | 109.0(4) |
| F(2)-C(23)-F(1)   | 105.6(3) |
| F(3)-C(23)-F(1)   | 109.0(3) |
| F(2)-C(23)-S(1)   | 112.0(3) |
| F(3)-C(23)-S(1)   | 110.8(3) |
| F(1)-C(23)-S(1)   | 110.4(3) |

---

Symmetry transformations used to generate equivalent atoms:

**Table S22.** Anisotropic displacement parameters ( $\text{Å}^2 \times 10^3$ ) for complex **10**. The anisotropic displacement factor exponent takes the form:  $-2 \pi^2 [ h^2 a^{*2} U_{11} + \dots + 2 h k a^* b^* U_{12} ]$

|       | U11   | U22   | U33   | U23   | U13    | U12  |
|-------|-------|-------|-------|-------|--------|------|
| Cu(1) | 39(1) | 38(1) | 39(1) | -3(1) | -5(1)  | 1(1) |
| Cl(1) | 54(1) | 58(1) | 47(1) | -1(1) | -16(1) | 0(1) |
| N(1)  | 37(1) | 36(1) | 41(1) | 3(1)  | 2(1)   | 2(1) |

|       |        |        |        |        |        |        |
|-------|--------|--------|--------|--------|--------|--------|
| N(2)  | 36(1)  | 31(1)  | 36(1)  | -2(1)  | 0(1)   | -3(1)  |
| N(3)  | 42(2)  | 34(1)  | 36(1)  | -2(1)  | 1(1)   | -4(1)  |
| S(1)  | 45(1)  | 41(1)  | 52(1)  | -4(1)  | 0(1)   | -7(1)  |
| O(1)  | 51(1)  | 45(1)  | 56(1)  | -11(1) | -9(1)  | -1(1)  |
| O(2)  | 57(2)  | 38(1)  | 72(2)  | -9(1)  | 12(1)  | -9(1)  |
| O(3)  | 76(2)  | 65(2)  | 63(2)  | 16(1)  | -14(1) | -10(1) |
| O(4)  | 42(1)  | 66(2)  | 67(2)  | -2(1)  | -8(1)  | -8(1)  |
| F(1)  | 95(2)  | 86(2)  | 144(2) | -73(2) | 2(2)   | 1(1)   |
| F(2)  | 56(2)  | 127(2) | 111(2) | -48(2) | 23(1)  | -14(1) |
| F(3)  | 124(3) | 176(3) | 56(2)  | 15(2)  | 12(2)  | 21(2)  |
| C(1)  | 42(2)  | 44(2)  | 45(2)  | 6(1)   | -1(1)  | 1(1)   |
| C(2)  | 50(2)  | 47(2)  | 61(2)  | 15(2)  | 9(2)   | 13(2)  |
| C(3)  | 60(2)  | 36(2)  | 61(2)  | 2(2)   | 14(2)  | 10(2)  |
| C(4)  | 51(2)  | 36(2)  | 54(2)  | -1(2)  | 9(2)   | -3(2)  |
| C(5)  | 40(2)  | 33(2)  | 38(2)  | 2(1)   | 5(1)   | -3(1)  |
| C(6)  | 39(2)  | 33(2)  | 40(2)  | 1(1)   | 5(1)   | -2(1)  |
| C(7)  | 49(2)  | 32(2)  | 41(2)  | -4(1)  | 2(1)   | -4(1)  |
| C(8)  | 41(2)  | 37(2)  | 38(2)  | 3(1)   | 0(1)   | -6(1)  |
| C(9)  | 40(2)  | 36(2)  | 40(2)  | 2(1)   | 2(1)   | 1(1)   |
| C(10) | 39(2)  | 32(2)  | 35(1)  | 4(1)   | 3(1)   | -1(1)  |
| C(11) | 40(2)  | 32(2)  | 34(2)  | 0(1)   | 1(1)   | -3(1)  |
| C(12) | 44(2)  | 44(2)  | 43(2)  | 0(1)   | 0(1)   | 1(1)   |
| C(13) | 62(2)  | 44(2)  | 50(2)  | -6(2)  | 10(2)  | 12(2)  |
| C(14) | 66(3)  | 43(2)  | 52(2)  | -14(2) | 0(2)   | 2(2)   |
| C(15) | 54(2)  | 41(2)  | 44(2)  | -8(1)  | -3(2)  | -3(2)  |
| C(16) | 48(2)  | 36(2)  | 38(2)  | -2(1)  | -1(1)  | -7(1)  |
| C(17) | 48(2)  | 45(2)  | 52(2)  | -5(2)  | -7(2)  | -2(2)  |
| C(18) | 52(2)  | 54(2)  | 55(2)  | 1(2)   | -16(2) | -6(2)  |
| C(19) | 62(2)  | 49(2)  | 48(2)  | -4(2)  | -10(2) | -17(2) |
| C(23) | 56(3)  | 79(3)  | 72(3)  | -22(2) | -2(2)  | -7(2)  |

**Table S23.** Hydrogen coordinates ( $\times 10^4$ ) and isotropic displacement parameters ( $\text{Å}^2 \times 10^3$ ) for complex **10**.

|       | x     | y    | z    | U(eq) |
|-------|-------|------|------|-------|
| H(1)  | 13912 | 4498 | 3993 | 52    |
| H(2)  | 14777 | 3489 | 3391 | 63    |
| H(3)  | 12814 | 2888 | 2340 | 62    |
| H(4)  | 10056 | 3328 | 1883 | 56    |
| H(7)  | 7396  | 3919 | 1431 | 49    |
| H(9)  | 4629  | 5519 | 2231 | 46    |
| H(12) | 4756  | 6414 | 3334 | 53    |
| H(13) | 5258  | 7325 | 4389 | 62    |

|       |       |      |      |    |
|-------|-------|------|------|----|
| H(14) | 8043  | 7461 | 5199 | 65 |
| H(15) | 10196 | 6685 | 4997 | 56 |
| H(17) | 2235  | 5159 | 1061 | 59 |
| H(18) | 724   | 4448 | -295 | 65 |
| H(19) | 2740  | 3572 | -643 | 64 |

**Table S24.** Torsion angles [deg] for complex **10**.

|                        |            |
|------------------------|------------|
| C(5)-N(1)-C(1)-C(2)    | -0.5(4)    |
| Cu(1)-N(1)-C(1)-C(2)   | 176.9(2)   |
| N(1)-C(1)-C(2)-C(3)    | -0.9(5)    |
| C(1)-C(2)-C(3)-C(4)    | 1.0(5)     |
| C(2)-C(3)-C(4)-C(5)    | 0.3(5)     |
| C(1)-N(1)-C(5)-C(4)    | 1.9(4)     |
| Cu(1)-N(1)-C(5)-C(4)   | -175.9(2)  |
| C(1)-N(1)-C(5)-C(6)    | -179.0(2)  |
| Cu(1)-N(1)-C(5)-C(6)   | 3.3(3)     |
| C(3)-C(4)-C(5)-N(1)    | -1.8(4)    |
| C(3)-C(4)-C(5)-C(6)    | 179.2(3)   |
| C(10)-N(2)-C(6)-C(7)   | 3.1(4)     |
| Cu(1)-N(2)-C(6)-C(7)   | -179.5(2)  |
| C(10)-N(2)-C(6)-C(5)   | -174.8(2)  |
| Cu(1)-N(2)-C(6)-C(5)   | 2.6(3)     |
| N(1)-C(5)-C(6)-N(2)    | -3.7(4)    |
| C(4)-C(5)-C(6)-N(2)    | 175.4(3)   |
| N(1)-C(5)-C(6)-C(7)    | 178.5(3)   |
| C(4)-C(5)-C(6)-C(7)    | -2.4(5)    |
| N(2)-C(6)-C(7)-C(8)    | -0.1(4)    |
| C(5)-C(6)-C(7)-C(8)    | 177.5(3)   |
| C(6)-C(7)-C(8)-C(9)    | -3.1(4)    |
| C(6)-C(7)-C(8)-C(16)   | 177.4(3)   |
| C(7)-C(8)-C(9)-C(10)   | 3.3(4)     |
| C(16)-C(8)-C(9)-C(10)  | -177.2(3)  |
| C(6)-N(2)-C(10)-C(9)   | -2.8(4)    |
| Cu(1)-N(2)-C(10)-C(9)  | 179.73(19) |
| C(6)-N(2)-C(10)-C(11)  | 176.5(2)   |
| Cu(1)-N(2)-C(10)-C(11) | -0.9(3)    |
| C(8)-C(9)-C(10)-N(2)   | -0.4(4)    |
| C(8)-C(9)-C(10)-C(11)  | -179.7(3)  |
| C(15)-N(3)-C(11)-C(12) | -3.0(4)    |
| Cu(1)-N(3)-C(11)-C(12) | 177.2(2)   |
| C(15)-N(3)-C(11)-C(10) | 177.6(2)   |
| Cu(1)-N(3)-C(11)-C(10) | -2.2(3)    |

|                         |           |
|-------------------------|-----------|
| N(2)-C(10)-C(11)-N(3)   | 2.0(3)    |
| C(9)-C(10)-C(11)-N(3)   | -178.6(3) |
| N(2)-C(10)-C(11)-C(12)  | -177.4(3) |
| C(9)-C(10)-C(11)-C(12)  | 1.9(5)    |
| N(3)-C(11)-C(12)-C(13)  | 2.5(4)    |
| C(10)-C(11)-C(12)-C(13) | -178.1(3) |
| C(11)-C(12)-C(13)-C(14) | -0.3(5)   |
| C(12)-C(13)-C(14)-C(15) | -1.4(5)   |
| C(11)-N(3)-C(15)-C(14)  | 1.2(4)    |
| Cu(1)-N(3)-C(15)-C(14)  | -179.1(2) |
| C(13)-C(14)-C(15)-N(3)  | 1.0(5)    |
| C(19)-O(1)-C(16)-C(17)  | 0.0(3)    |
| C(19)-O(1)-C(16)-C(8)   | -178.8(3) |
| C(7)-C(8)-C(16)-C(17)   | 178.6(3)  |
| C(9)-C(8)-C(16)-C(17)   | -0.9(5)   |
| C(7)-C(8)-C(16)-O(1)    | -3.0(4)   |
| C(9)-C(8)-C(16)-O(1)    | 177.5(2)  |
| O(1)-C(16)-C(17)-C(18)  | -0.1(4)   |
| C(8)-C(16)-C(17)-C(18)  | 178.4(3)  |
| C(16)-C(17)-C(18)-C(19) | 0.1(4)    |
| C(17)-C(18)-C(19)-O(1)  | -0.1(4)   |
| C(16)-O(1)-C(19)-C(18)  | 0.1(4)    |
| O(4)-S(1)-C(23)-F(2)    | -177.5(3) |
| O(3)-S(1)-C(23)-F(2)    | 61.4(3)   |
| O(2)-S(1)-C(23)-F(2)    | -57.2(3)  |
| O(4)-S(1)-C(23)-F(3)    | -55.6(3)  |
| O(3)-S(1)-C(23)-F(3)    | -176.7(3) |
| O(2)-S(1)-C(23)-F(3)    | 64.7(3)   |
| O(4)-S(1)-C(23)-F(1)    | 65.2(3)   |
| O(3)-S(1)-C(23)-F(1)    | -55.9(3)  |
| O(2)-S(1)-C(23)-F(1)    | -174.5(3) |

---

Symmetry transformations used to generate equivalent atoms:

## 15. Density functional theory (DFT) calculations

**Table S25.** The global properties<sup>a</sup> and of the nucleophilic reagents

| Entry | <i>p</i> -R-Py | HOMO    | LUMO    | <i>N</i> | Charge at N atom (e) |
|-------|----------------|---------|---------|----------|----------------------|
| 1     | <i>p</i> -CNP  | -0.2797 | -0.0763 | 1.51     | -0.432               |
| 2     | Py             | -0.2526 | -0.0225 | 2.25     | -0.452               |
| 3     | <i>p</i> -MeP  | -0.2496 | -0.0183 | 2.33     | -0.458               |
| 4     | <i>p</i> -MOP  | -0.2450 | -0.0076 | 2.46     | -0.476               |
| 5     | <i>p</i> -MPP  | -0.2156 | -0.0044 | 3.26     | -0.481               |

|    |                    |         |         |      |        |
|----|--------------------|---------|---------|------|--------|
| 6  | <i>p</i> -DMAP     | -0.2055 | 0.0059  | 3.54 | -0.490 |
| 7  | <i>o</i> -DMAP     | -0.1939 | -0.0070 | 3.85 | -0.519 |
| 8  | <i>m</i> -DMAP     | -0.1934 | -0.0075 | 3.87 | -0.438 |
| 9  | <i>p</i> -DEAP     | -0.2025 | 0.0049  | 3.62 | -0.493 |
| 10 | Piperidine         | -0.2090 | 0.0825  | 3.44 | -0.691 |
| 11 | <i>p</i> -DMAP TFA | -0.253  | -0.0287 | 2.23 | -0.460 |

<sup>a</sup> HOMO, LUMO in au; global nucleophilicity (*N*), values in eV.

**Table S26.** Cartesian coordinates and free energies (298 °C) for DFT optimized structures formed by complex **1a** with DMAP positional isomers.

**1a + *o*-DMAP    -2470.075968 a.u**

|    |             |             |             |
|----|-------------|-------------|-------------|
| Cu | -0.74059500 | 0.32462100  | -0.39700500 |
| Cl | -0.98367000 | 0.62478500  | -2.58707400 |
| Cl | -1.42048200 | 0.23436700  | 1.72606900  |
| N  | 0.09980800  | 2.29735000  | -0.12823700 |
| N  | -0.42206700 | -1.79767300 | -0.57211900 |
| N  | -4.22775000 | -0.90058600 | -0.51338200 |
| N  | 1.40239000  | 0.03889600  | -0.19220200 |
| O  | 6.28060700  | 0.55457500  | 0.57232100  |
| C  | -0.64775100 | 3.39500200  | -0.12841300 |
| C  | -0.10248300 | 4.66516200  | 0.03280600  |
| C  | 1.27333200  | 4.77356700  | 0.19757800  |
| C  | 2.05286600  | 3.62248800  | 0.19735100  |
| C  | 1.43120900  | 2.38638000  | 0.03170800  |
| C  | 2.17230200  | 1.09680600  | 0.01721800  |
| C  | 3.54499300  | 0.95046300  | 0.20553100  |
| C  | 4.08815500  | -0.34138800 | 0.17253700  |
| C  | 3.23902300  | -1.43540600 | -0.04886900 |
| C  | 1.87972900  | -1.19766900 | -0.22877800 |
| C  | 5.50999300  | -0.55137800 | 0.36664100  |
| C  | 6.30148900  | -1.66733700 | 0.39189000  |
| C  | 7.63207000  | -1.21904100 | 0.62621200  |
| C  | 7.55746300  | 0.13606600  | 0.72678300  |
| C  | 0.84476500  | -2.23886500 | -0.46994400 |
| C  | 1.14672100  | -3.59329800 | -0.59045300 |
| C  | 0.11501000  | -4.49721300 | -0.81993400 |
| C  | -1.18699900 | -4.02678400 | -0.92517200 |

|   |             |             |             |
|---|-------------|-------------|-------------|
| C | -1.41298400 | -2.65796200 | -0.79697600 |
| C | -4.61398800 | -0.34224300 | 0.64723600  |
| C | -4.99437500 | 1.01745200  | 0.71722300  |
| C | -4.96188900 | 1.77624000  | -0.43823400 |
| C | -4.55417500 | 1.20119900  | -1.64197700 |
| C | -4.20045800 | -0.13961500 | -1.60979500 |
| H | -1.71957600 | 3.23901600  | -0.26304300 |
| H | -0.74464300 | 5.54257300  | 0.02759500  |
| H | 1.74020700  | 5.74882300  | 0.32508800  |
| H | 3.13157200  | 3.69091300  | 0.32142000  |
| H | 4.19879600  | 1.80069700  | 0.38158600  |
| H | 3.64717600  | -2.44373900 | -0.07346700 |
| H | 5.97619300  | -2.69258800 | 0.25930000  |
| H | 8.52609300  | -1.82469600 | 0.70665000  |
| H | 8.29075600  | 0.91315300  | 0.89694000  |
| H | 2.17426400  | -3.94231400 | -0.51078200 |
| H | 0.33142500  | -5.55987900 | -0.91674000 |
| H | -2.02266800 | -4.69967200 | -1.10408900 |
| H | -2.41849400 | -2.22817100 | -0.85402700 |
| H | -4.48203800 | 1.77187100  | -2.56463100 |
| H | -3.84961500 | -0.63282200 | -2.51908500 |
| H | -5.24680300 | 2.82802200  | -0.39662800 |
| H | -5.28949400 | 1.47172200  | 1.65900600  |
| N | -4.63935400 | -1.15123400 | 1.76043000  |
| C | -4.73485300 | -0.53893000 | 3.06821000  |
| H | -5.69482100 | -0.01890600 | 3.19617700  |
| H | -4.68519700 | -1.32495100 | 3.82854400  |
| H | -3.91167900 | 0.17192800  | 3.25312500  |
| C | -4.00947700 | -2.45376400 | 1.69679700  |
| H | -2.90928300 | -2.37736500 | 1.74673400  |
| H | -4.36223200 | -3.05771800 | 2.54129400  |
| H | -4.28628000 | -2.95895100 | 0.76619700  |

**1a + m-DMAP      -2470.068733 a.u**

|    |             |             |             |
|----|-------------|-------------|-------------|
| Cu | -0.76317700 | 0.09272600  | 0.34304600  |
| Cl | -0.33401600 | 0.24525600  | 2.60020000  |
| Cl | -0.95979500 | -0.06612200 | -1.96648000 |
| N  | -0.13029500 | -2.10337300 | 0.39853400  |
| N  | -0.09034200 | 2.25511500  | 0.08746500  |
| N  | -2.90683600 | 0.13687200  | 0.64031400  |
| N  | 1.38987500  | 0.04838700  | 0.04449600  |
| O  | 6.19407500  | -1.23347500 | -0.36510600 |

|   |             |             |             |
|---|-------------|-------------|-------------|
| C | -0.95988200 | -3.12520100 | 0.56227300  |
| C | -0.53702500 | -4.45109700 | 0.53011500  |
| C | 0.81344000  | -4.69826900 | 0.31432900  |
| C | 1.68319800  | -3.62734000 | 0.14825600  |
| C | 1.17288500  | -2.32850100 | 0.20004800  |
| C | 2.02733600  | -1.12049000 | 0.04241500  |
| C | 3.41279900  | -1.18531400 | -0.09239200 |
| C | 4.13733700  | 0.00069500  | -0.23057200 |
| C | 3.43803000  | 1.21153700  | -0.22984400 |
| C | 2.05372200  | 1.19673000  | -0.08794300 |
| C | 5.58082800  | -0.01564300 | -0.37063200 |
| C | 6.52281400  | 0.96605300  | -0.51455700 |
| C | 7.78450900  | 0.31205300  | -0.60212000 |
| C | 7.52273900  | -1.01957100 | -0.50566100 |
| C | 1.22465600  | 2.43326900  | -0.07566600 |
| C | 1.76515800  | 3.71171200  | -0.22908600 |
| C | 0.91345400  | 4.80972000  | -0.21147700 |
| C | -0.45153900 | 4.60983700  | -0.04396900 |
| C | -0.90473400 | 3.30189100  | 0.10163900  |
| C | -3.71087700 | -0.21593500 | -0.36543400 |
| C | -5.11660200 | -0.17389600 | -0.29235100 |
| C | -5.66780800 | 0.29342700  | 0.91261100  |
| C | -4.82124700 | 0.65309600  | 1.95197100  |
| C | -3.44478400 | 0.56046600  | 1.79436300  |
| H | -2.00757000 | -2.86602300 | 0.72885400  |
| H | -1.24934500 | -5.26129800 | 0.66915200  |
| H | 1.19155800  | -5.71860300 | 0.27559100  |
| H | 2.74112700  | -3.81105600 | -0.02411300 |
| H | 3.94186400  | -2.13382300 | -0.08489700 |
| H | 3.98036000  | 2.14815700  | -0.33653900 |
| H | 6.34115000  | 2.03378400  | -0.55271300 |
| H | 8.75776500  | 0.77195700  | -0.72121900 |
| H | 8.14329700  | -1.90574400 | -0.51741000 |
| H | 2.83410700  | 3.86132700  | -0.36256300 |
| H | 1.31760500  | 5.81388700  | -0.32973100 |
| H | -1.15042300 | 5.44304500  | -0.02625800 |
| H | -1.96547000 | 3.07831000  | 0.23419300  |
| H | -3.19369500 | -0.52010300 | -1.27168800 |
| H | -5.23094800 | 1.01402500  | 2.89352900  |
| H | -2.74040500 | 0.81612100  | 2.58371300  |
| H | -6.74479900 | 0.37766800  | 1.04203900  |
| N | -5.88907500 | -0.57283800 | -1.36497800 |
| C | -7.30602900 | -0.29827900 | -1.33795300 |
| H | -7.52951700 | 0.78090700  | -1.25811900 |



|   |             |             |             |
|---|-------------|-------------|-------------|
| H | -7.76228800 | -0.67459300 | -2.25835700 |
| H | -7.79425100 | -0.81099900 | -0.49658800 |
| C | -5.24584100 | -0.80447100 | -2.64399600 |
| H | -6.00458200 | -1.10629600 | -3.37203300 |
| H | -4.72552200 | 0.09003700  | -3.02622600 |
| H | -4.50821300 | -1.61524200 | -2.57637300 |

**1a + p-DMAP     -2470.075047 a.u**

|    |             |             |             |
|----|-------------|-------------|-------------|
| Cu | -0.65036800 | 0.02691200  | -0.00006800 |
| Cl | -0.52127200 | 0.03132800  | 2.30776000  |
| Cl | -0.52079000 | 0.03475400  | -2.30778400 |
| N  | 0.03439800  | -2.15116500 | -0.00114800 |
| N  | 0.00512300  | 2.21302300  | 0.00140300  |
| N  | -2.80509500 | 0.00054100  | -0.00008300 |
| N  | 1.53305700  | 0.04175700  | 0.00020000  |
| N  | -7.00744100 | -0.07952100 | -0.00067400 |
| O  | 6.38556300  | -1.12640700 | -0.00057400 |
| C  | -0.78634900 | -3.19270600 | -0.00100600 |
| C  | -0.33264400 | -4.50839700 | 0.00027900  |
| C  | 1.04046300  | -4.72328100 | 0.00156700  |
| C  | 1.90019000  | -3.63131900 | 0.00144100  |
| C  | 1.35742800  | -2.34430200 | 0.00000400  |
| C  | 2.19497600  | -1.11362800 | -0.00010800 |
| C  | 3.58821500  | -1.14600200 | -0.00047500 |
| C  | 4.29493100  | 0.05866100  | -0.00026000 |
| C  | 3.57079400  | 1.25460100  | 0.00027700  |
| C  | 2.18005800  | 1.20737900  | 0.00040500  |
| C  | 5.74529300  | 0.07749900  | -0.00058200 |
| C  | 6.67163900  | 1.08411500  | -0.00092800 |
| C  | 7.95202600  | 0.46133500  | -0.00112700 |
| C  | 7.71609800  | -0.87846800 | -0.00092900 |
| C  | 1.32481700  | 2.42610600  | 0.00084700  |
| C  | 1.84678200  | 3.72163300  | 0.00068400  |
| C  | 0.97015900  | 4.80001000  | 0.00113900  |
| C  | -0.39954900 | 4.56385300  | 0.00174000  |
| C  | -0.83233400 | 3.24120400  | 0.00182100  |
| C  | -3.51259300 | -0.01347800 | -1.14438000 |
| C  | -4.89331300 | -0.04065200 | -1.19596700 |
| C  | -5.64072900 | -0.05431500 | -0.00046900 |
| C  | -4.89363300 | -0.04055500 | 1.19523600  |
| C  | -3.51290400 | -0.01343000 | 1.14401700  |
| C  | -7.72733000 | -0.10163900 | -1.25549600 |

|   |             |             |             |
|---|-------------|-------------|-------------|
| C | -7.72776500 | -0.10168500 | 1.25389100  |
| H | -1.85303000 | -2.95847800 | -0.00186500 |
| H | -1.03760600 | -5.33674800 | 0.00035400  |
| H | 1.44383100  | -5.73464900 | 0.00276000  |
| H | 2.97602700  | -3.79008400 | 0.00263600  |
| H | 4.13565700  | -2.08404900 | -0.00102600 |
| H | 4.09933100  | 2.20507400  | 0.00064000  |
| H | 6.46804500  | 2.14856700  | -0.00107700 |
| H | 8.92009900  | 0.94681300  | -0.00142400 |
| H | 8.35682400  | -1.75021600 | -0.00096400 |
| H | 2.91998900  | 3.89815900  | 0.00014800  |
| H | 1.35744500  | 5.81765300  | 0.00099800  |
| H | -1.11732800 | 5.38110200  | 0.00209800  |
| H | -1.89489000 | 2.98869500  | 0.00220500  |
| H | -2.91709000 | -0.00289000 | -2.05779800 |
| H | -5.37649200 | -0.05202800 | -2.16936900 |
| H | -5.37707200 | -0.05187900 | 2.16850900  |
| H | -2.91761200 | -0.00298000 | 2.05757800  |
| H | -7.48535800 | -0.99687600 | -1.84884800 |
| H | -7.50360100 | 0.78592300  | -1.86660800 |
| H | -8.80197200 | -0.11009200 | -1.05435800 |
| H | -7.48591000 | -0.99688200 | 1.84734300  |
| H | -8.80233400 | -0.11031500 | 1.05236500  |
| H | -7.50438900 | 0.78592700  | 1.86505700  |

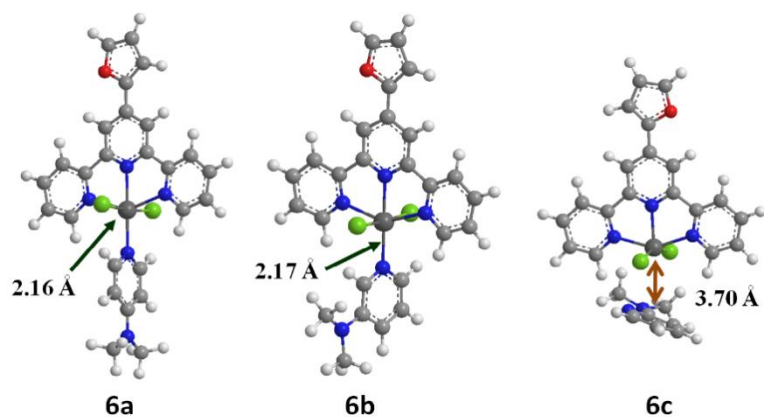

**Figure S15.** Calculated chemical structures of complexes **6a-c**.

## 16. pK<sub>a</sub> value of pyridine derivatives

Table S27. pK<sub>a</sub> value of pyridine derivatives

| Entry | Pyridine derivatives | pK <sub>a</sub> (exp.)      | pK <sub>a</sub> (predicted) <sup>a</sup> |
|-------|----------------------|-----------------------------|------------------------------------------|
| 1     | Py                   | 5.25 <sup>S6</sup>          | 5.23 ± 0.10                              |
| 2     | <i>p</i> -MeP        | 6.02 <sup>S6</sup>          | 5.94 ± 0.10                              |
| 3     | <i>p</i> -MOP        | 6.59 <sup>S7</sup>          | 6.59 ± 0.10                              |
| 4     | <i>p</i> -MPP        | /                           | 7.97 ± 0.26                              |
| 5     | <i>p</i> -DMAP       | 9.70 <sup>S8</sup>          | 9.52 ± 0.10                              |
| 6     | <i>m</i> -DMAP       | 6.37 <sup>S8</sup>          | 6.33 ± 0.10                              |
| 7     | <i>o</i> -DMAP       | 6.94 <sup>S8</sup>          | 7.04 ± 0.10                              |
| 8     | <i>p</i> -DEMP       | /                           | 10.19 ± 0.10                             |
| 9     | <i>p</i> -CNP        | 2.25 <sup>S7</sup>          | 1.92 ± 0.10                              |
| 10    | 3-Hydroxypyridine    | 4.75 <sup>S9</sup>          | 9.15 ± 0.10                              |
| 11    | 2-Aminopyridine      | 6.86 <sup>S6</sup>          | 6.67 ± 0.11                              |
| 12    | 2-Chloropyridine     | 0.72 <sup>S6</sup>          | 0.14 ± 0.10                              |
| 13    | 2,6-Dimethylpyridine | 6.79 <sup>S10</sup>         | 6.67 ± 0.10                              |
| 14    | 2,6-Difluoropyridine | /                           | -6.09 ± 0.10                             |
| 15    | 2-Chloropyrazine     | /                           | -1.10 ± 0.10                             |
| 16    | Quinoline            | 4.94 <sup>S11</sup>         | 4.97 ± 0.17                              |
| 17    | Isoquinoline         | 5.40 <sup>S12</sup>         | 5.37 ± 0.23                              |
| 18    | Piperidine           | 11.21 ± 0.04 <sup>S13</sup> | 10.45 ± 0.10                             |

<sup>a</sup> Most Basic Temp: 25 °C, Calculated using Advanced Chemistry Development (ACD/Labs) Software V11.02

## 17. UV/Vis spectra

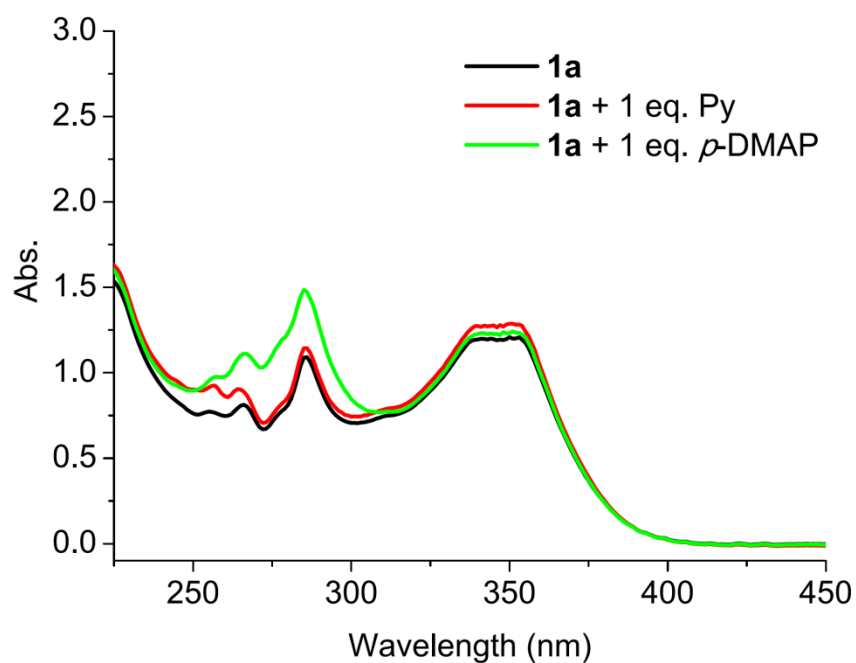

**Figure S16.** The UV-Vis spectrum of: a) Cu(II)-terpyridine complex **1a**, b) Cu(II)-terpyridine complex **1a** with 1 equiv. Py and c) Cu(II)-terpyridine complex **1a** with 1 equiv. *p*-DMAP in H<sub>2</sub>O ( $1.0 \times 10^{-5}$  M).

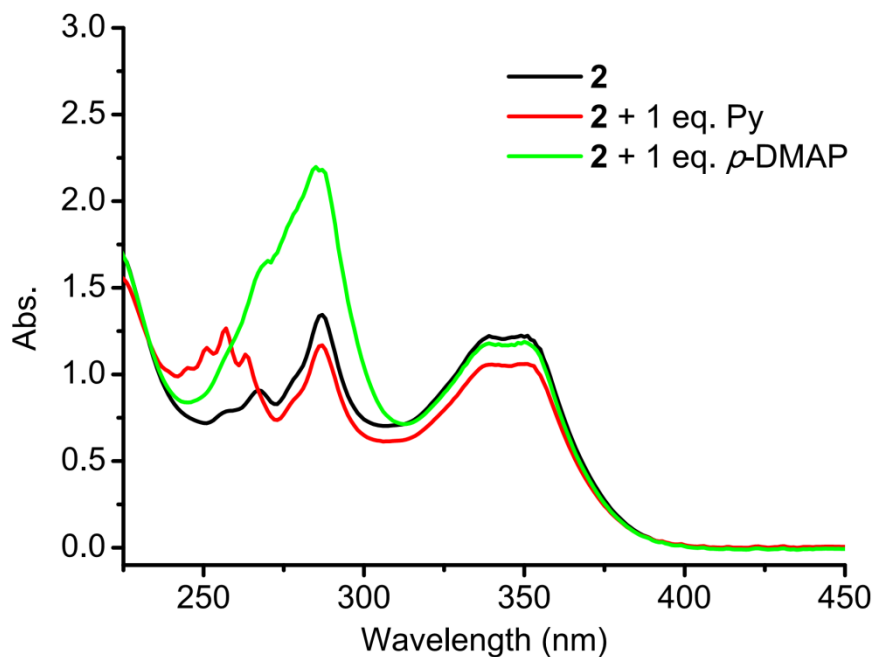

**Figure S17.** The UV-Vis spectrum of: a) Cu(II)-terpyridine complex **2**, b) Cu(II)-terpyridine complex **2** with 1 equiv. Py and c) Cu(II)-terpyridine complex **2** with 1 equiv. *p*-DMAP in H<sub>2</sub>O ( $1.0 \times 10^{-5}$  M).

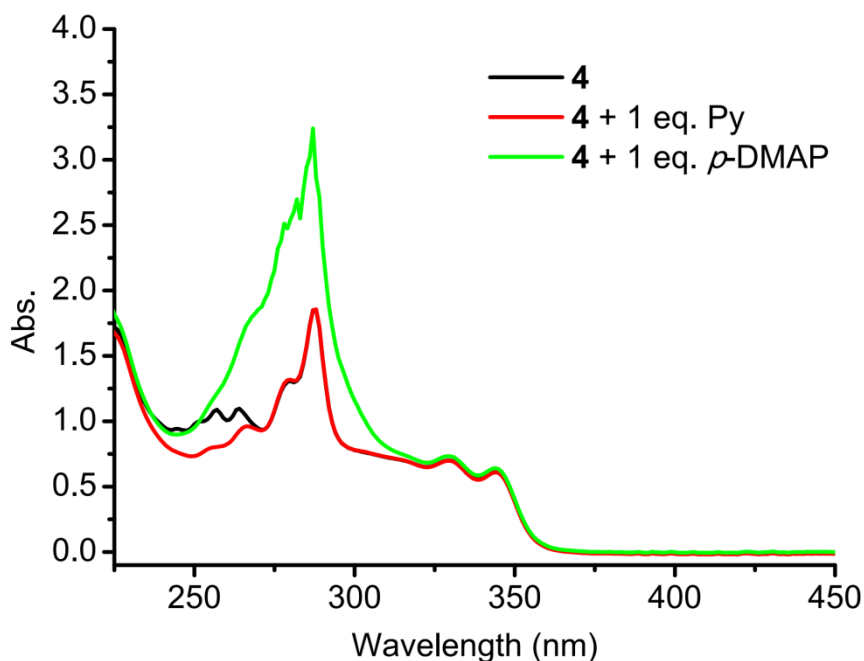

**Figure 18.** The UV-Vis spectrum of: a) Cu(II)-terpyridine complex **4**, b) Cu(II)-terpyridine complex **4** with 1 equiv. Py and c) Cu(II)-terpyridine complex **4** with 1 equiv. *p*-DMAP in H<sub>2</sub>O ( $1.0 \times 10^{-5}$  M).

**18. SEM images of collapsed sols and hydrogels formed by metallogel 1a with *p*-substituted pyridines.**

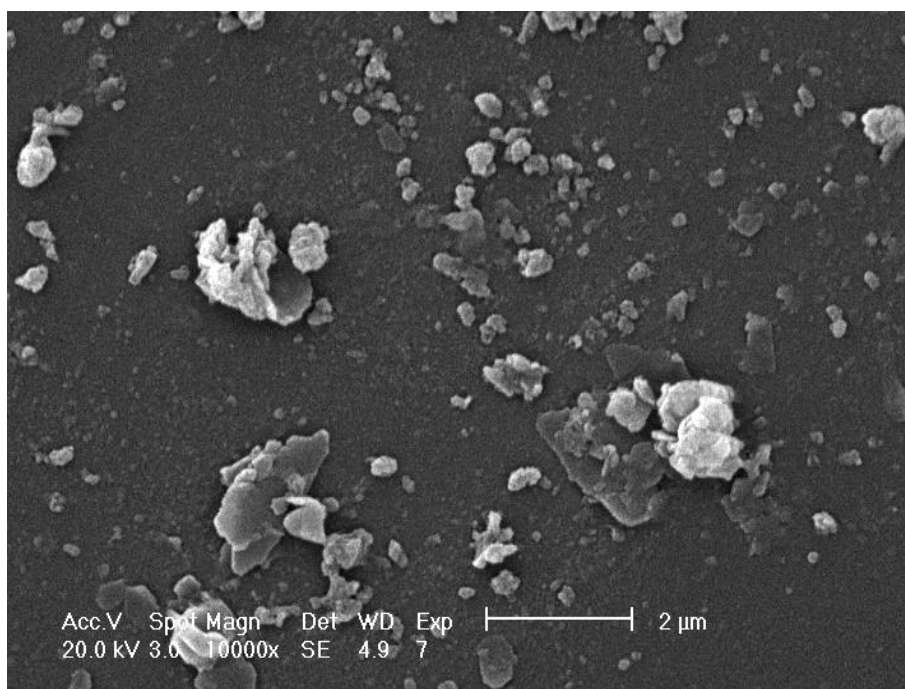

**Figure S19.** SEM image of metallogel formed by gel **1a**/H<sub>2</sub>O (1.0 wt%) with 1 equiv. Py, scale of bar 2 μm.

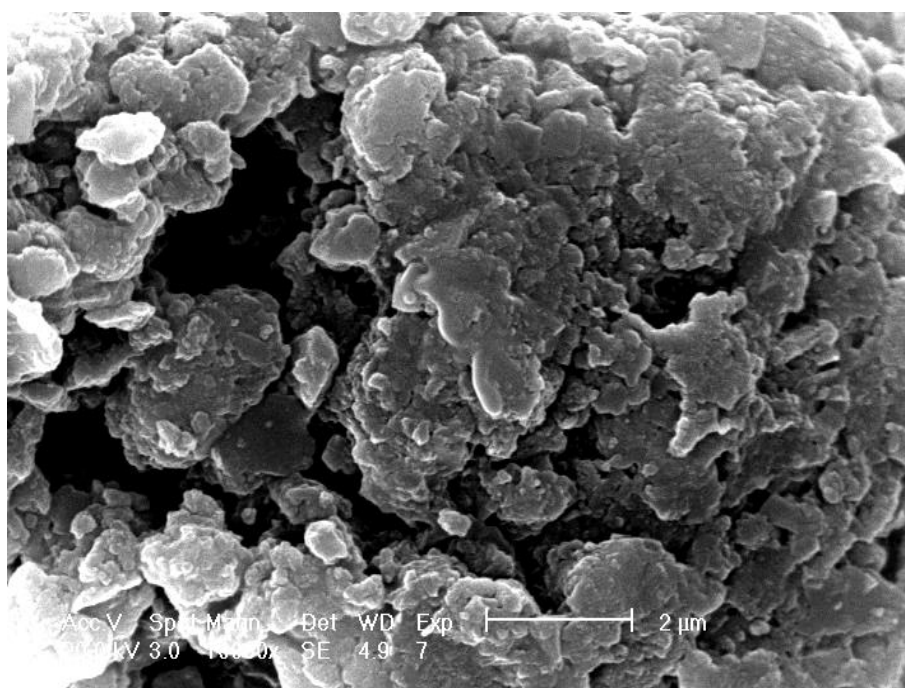

**Figure S20.** SEM image of metallogel formed by gel **1a**/H<sub>2</sub>O (1.0 wt%) with 1 equiv. *p*-MeP, scale of bar 2 μm.

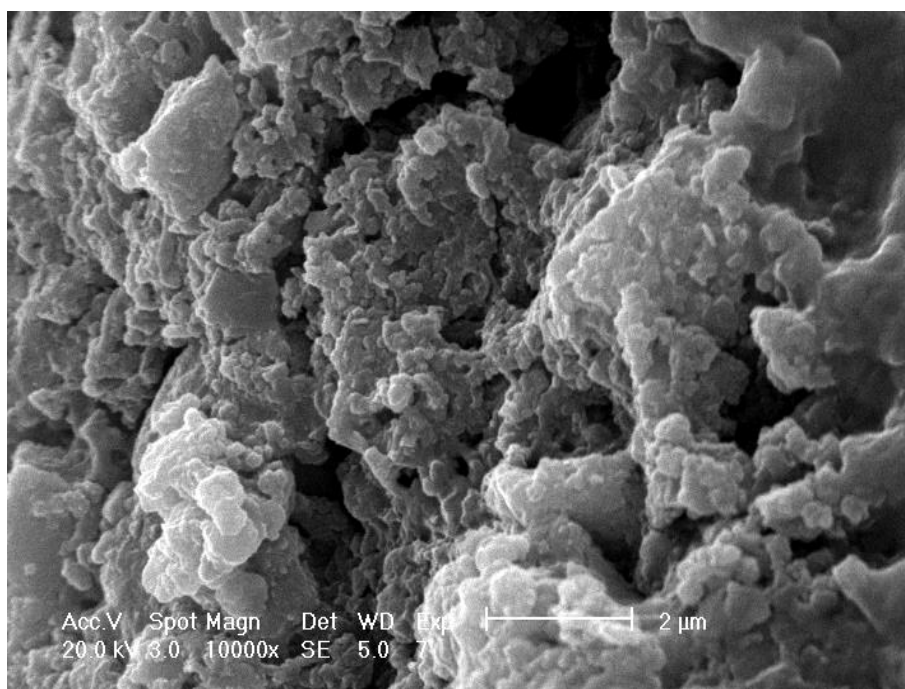

**Figure S21.** SEM image of metallogel formed by gel **1a**/H<sub>2</sub>O (1.0 wt%) with 1 equiv. *p*-MOP, scale of bar 2 μm.

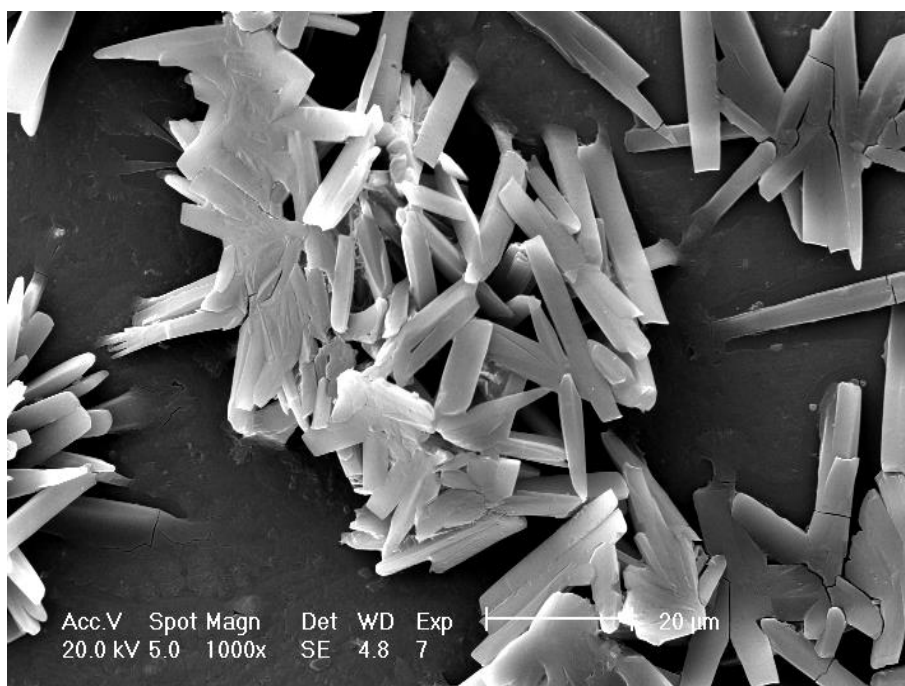

**Figure S22.** SEM image of weak metallogel formed by gel **1a**/H<sub>2</sub>O (1.0 wt%) with 1 equiv. *p*-MPP, scale of bar 20 μm.

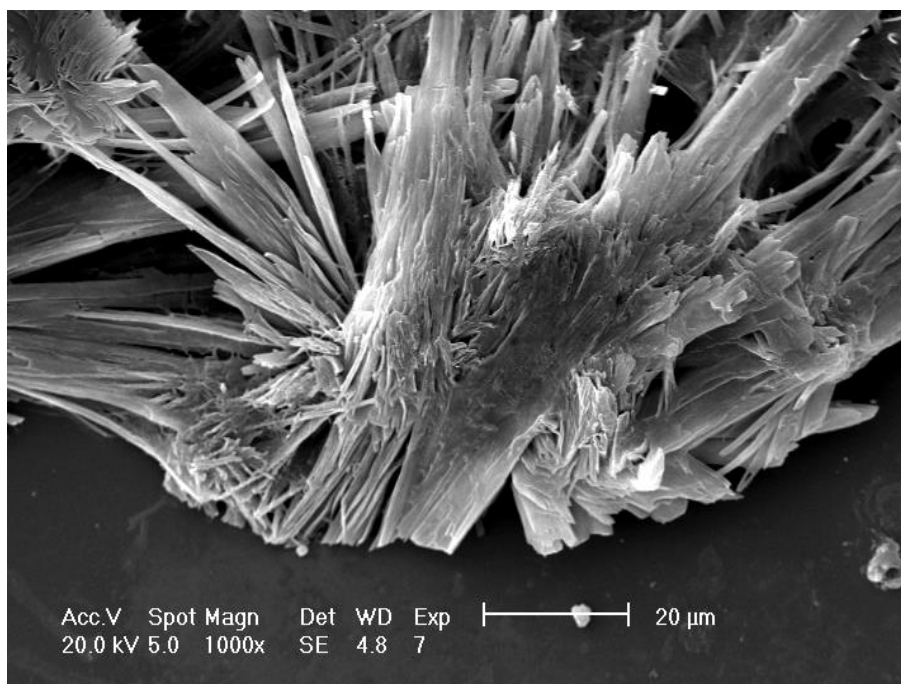

**Figure S23.** SEM image of collapsed sol formed by gel **1a**/H<sub>2</sub>O (1.0 wt%) with 1 equiv. *p*-DEAP, scale of bar 20 μm.

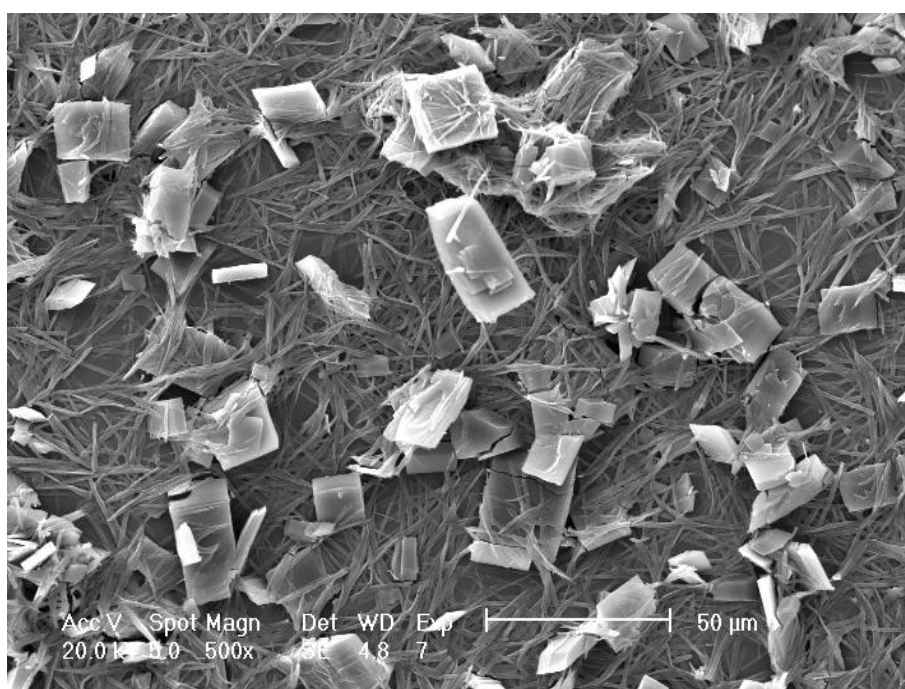

**Figure S24.** SEM image of sol formed by gel **1a**/H<sub>2</sub>O (1.0 wt%) with 1 equiv. *p*-DMAP, scale of bar 50 μm.

**19. SEM images of collapsed sol and hydrogels formed by metallo gel **1a** with *p*-DMAP positional isomers.**



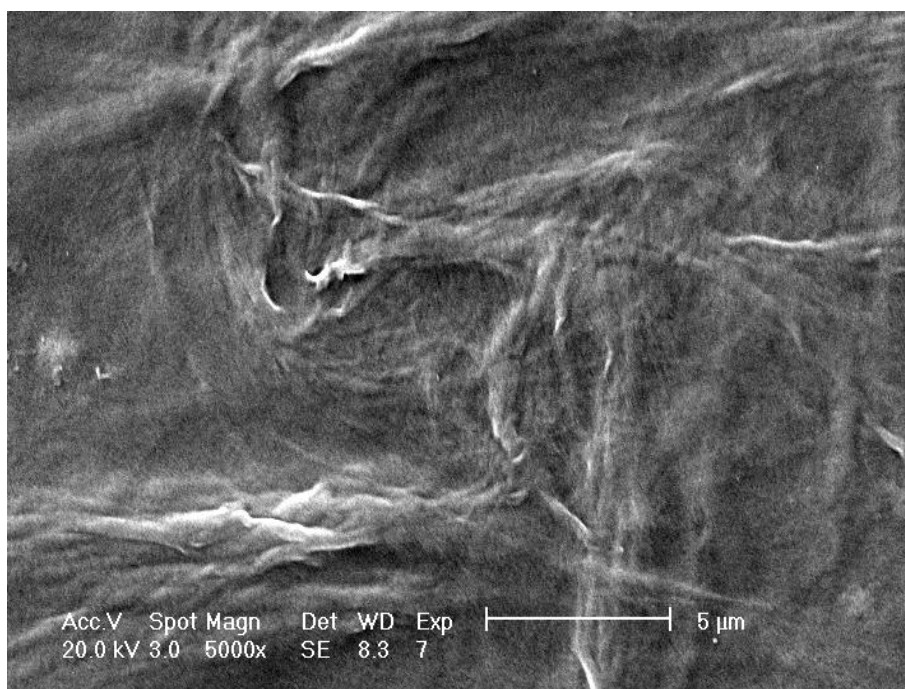

**Figure S25.** SEM image of metallogel formed by gel **1a**/H<sub>2</sub>O (1.0 wt%) with 1 equiv. *o*-DMAP, scale of bar 5 μm.

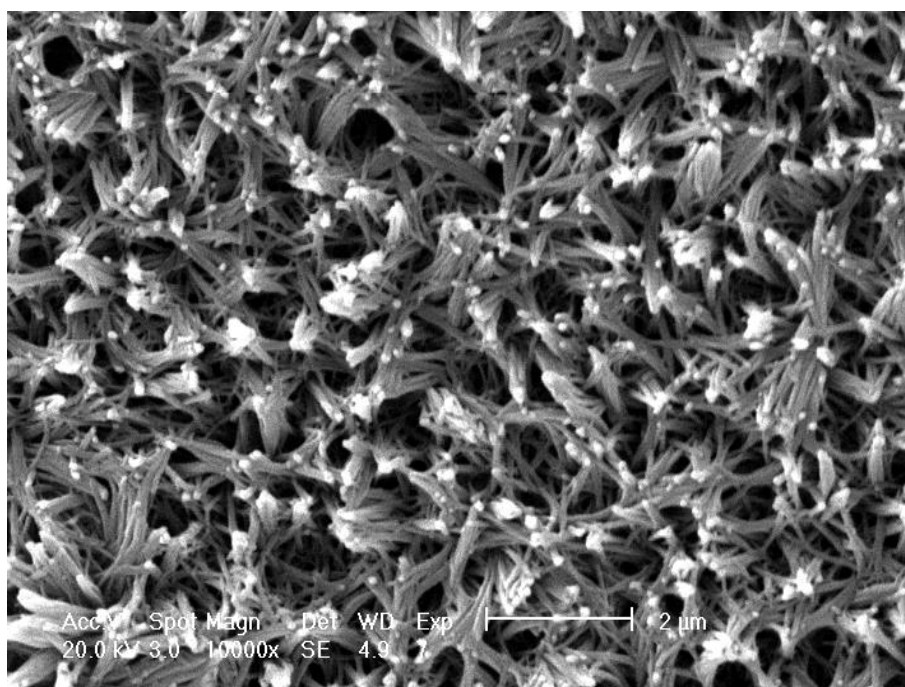

**Figure S26.** SEM image of metallogel formed by gel **1a**/H<sub>2</sub>O (1.0 wt%) with 1 equiv. *m*-DMAP, scale of bar 2 μm.

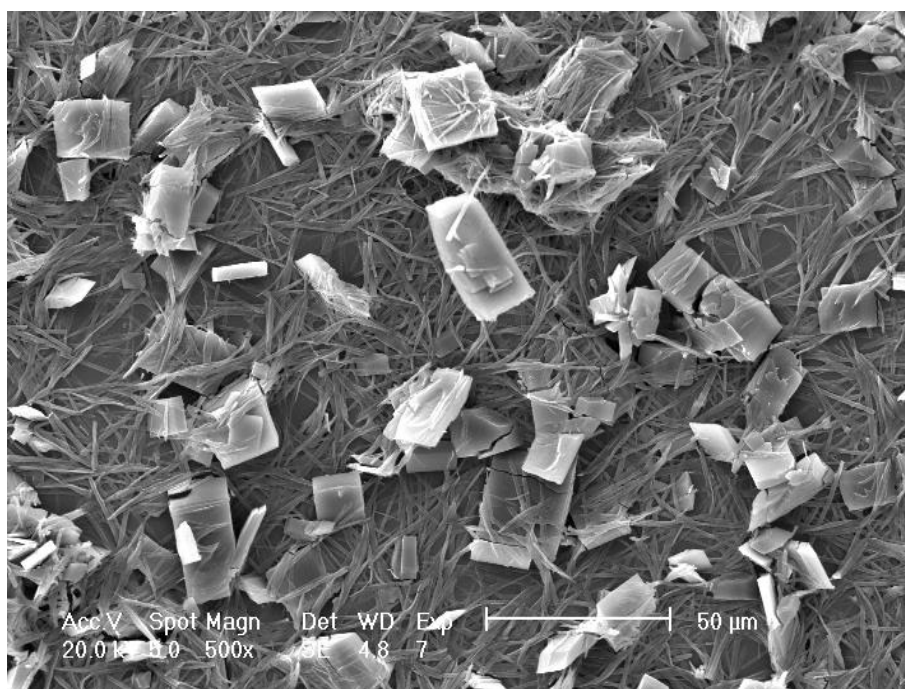

**Figure S27.** SEM image of sol formed by gel **1a**/H<sub>2</sub>O (1.0 wt%) with 1 equiv. *p*-DMAP, scale of bar 50 μm.

**20. Reversible gel-to-sol phase transition of metallogel **1a** controlled by adding *p*-DMAP and TFA.**

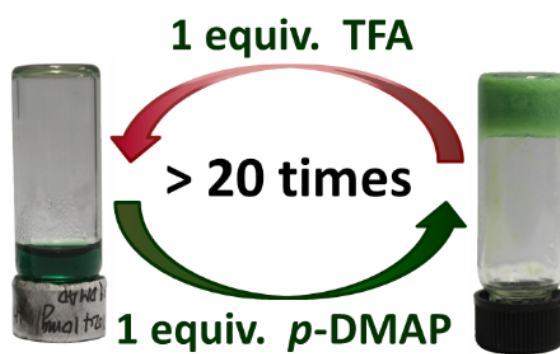

**Figure S28.** Reversible gel-to-sol phase transition of metallogel **1a** controlled by adding *p*-DMAP and TFA.

**21. <sup>1</sup>H NMR studies of *p*-DMAP without and with TFA.**

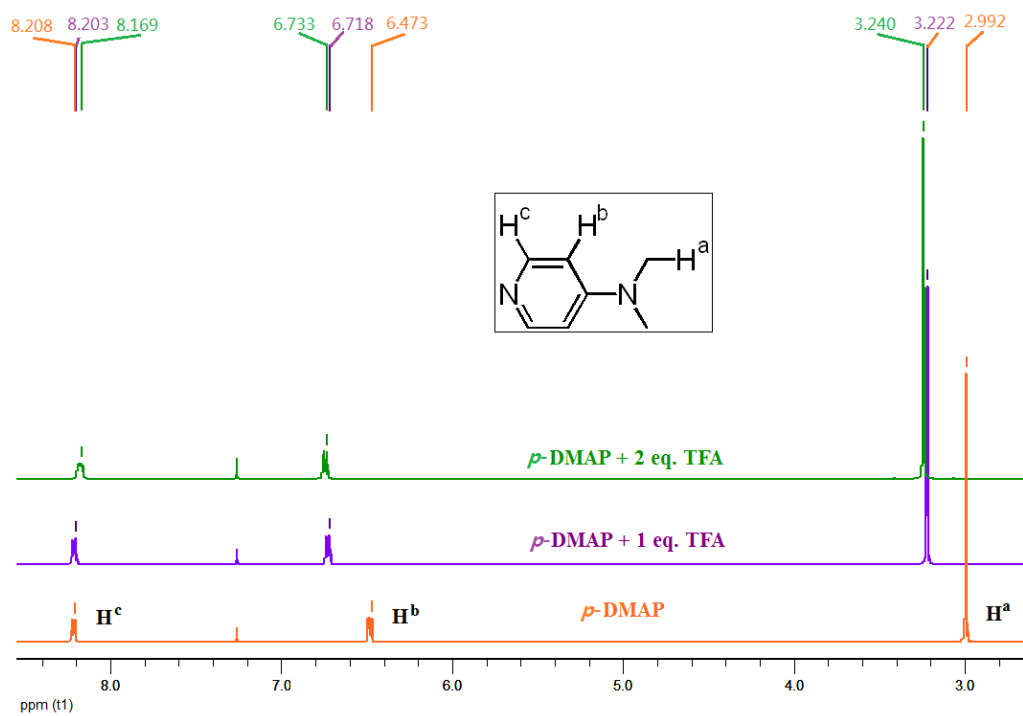

**Figure S29**  $^1\text{H}$  NMR studies of *p*-DMAP without and with TFA.

**22. TEM images of metallo-hydrogel reformed by collapsed sol containing *p*-DMAP after adding TFA.**

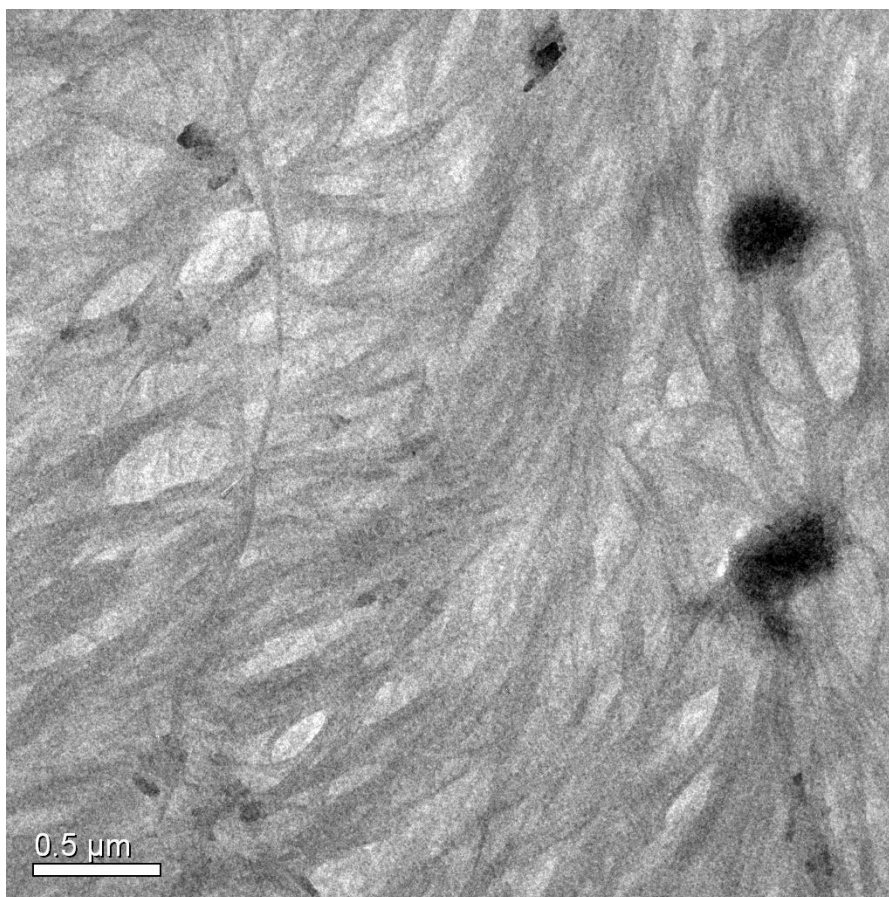

**Figure S30.** TEM image of metallo-hydrogel (1.0 wt%) reformed by collapsed sol **1a** in H<sub>2</sub>O containing 1 equiv. *p*-DMAP after the addition of 1 equiv. TFA, scale of bar 0.5 μm.

**23. SEM images of gel-to-sol phase transition of metallogel 1a controlled by adding *p*-DMAP and TFA.**



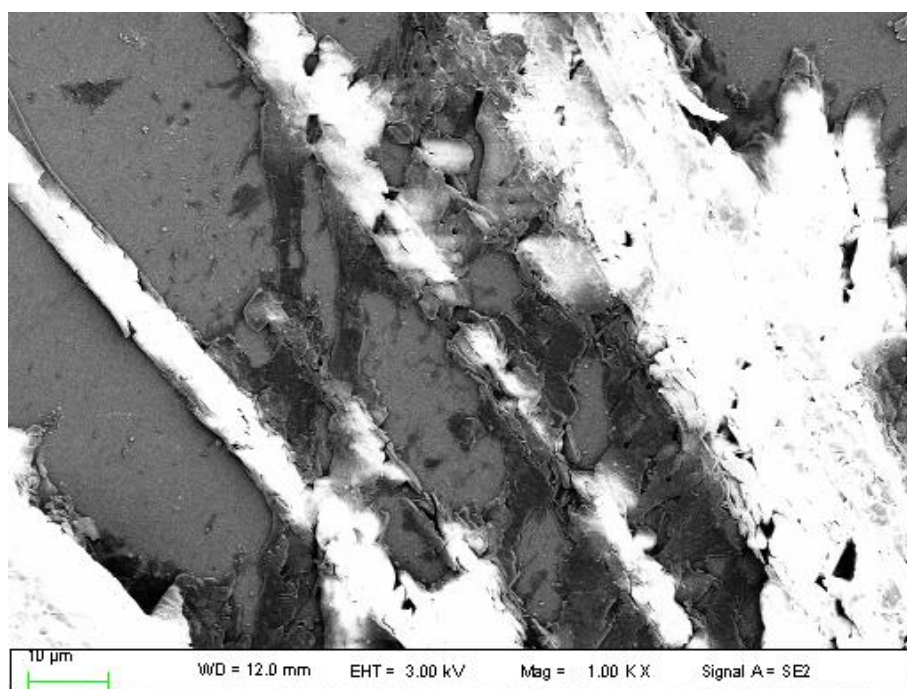

**Figure S31.** SEM image of sol (1.0 wt%) collapsed by metallo-hydrogel containing 1 equiv. *p*-DMAP and 1 equiv. TFA after the addition of 1 equiv. *p*-DMAP, scale of bar 10 μm.

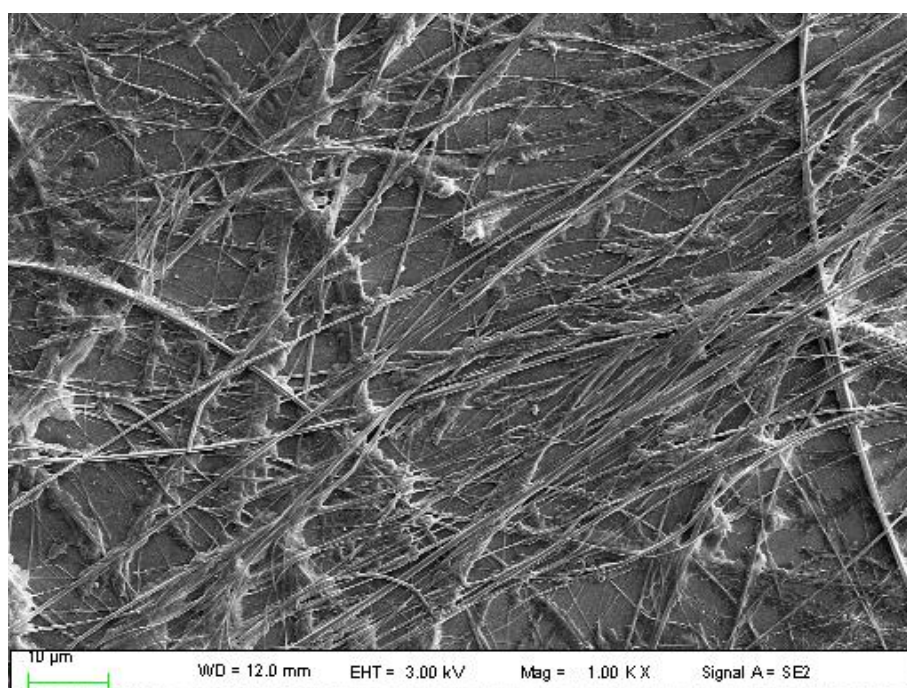

**Figure S32.** SEM image of metallo-hydrogel (1.0 wt%) reformed by collapsed sol **1a** in H<sub>2</sub>O containing 2 equiv. *p*-DMAP and 1 equiv. TFA after the addition of 1 equiv. TFA, scale of bar 10 μm.

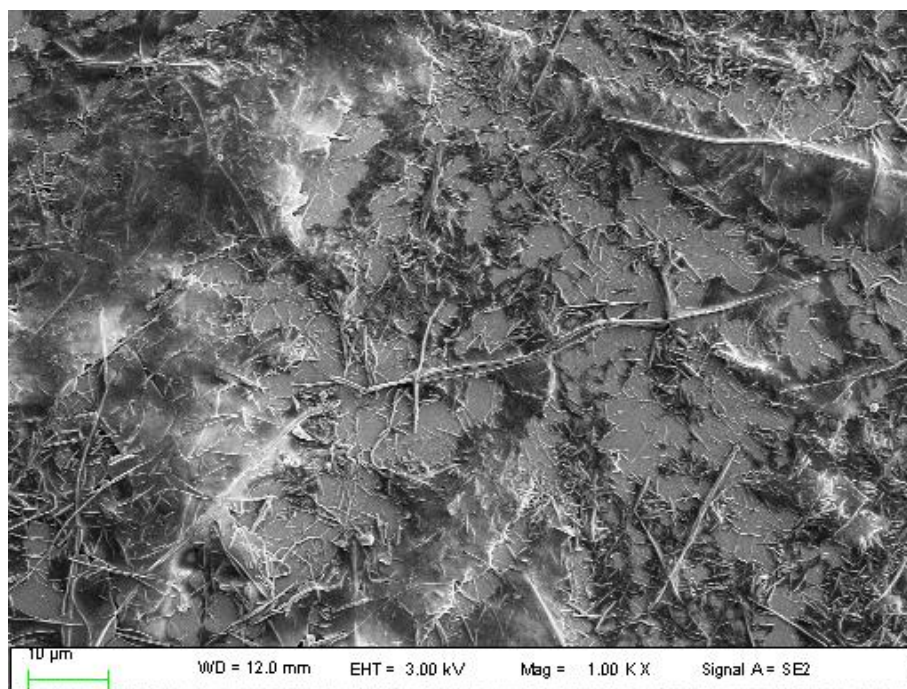

**Figure S33.** SEM image of metallo-hydrogel (1.0 wt%) reformed by collapsed sol **1a** in H<sub>2</sub>O containing 5 equiv. *p*-DMAP and 4 equiv. TFA after the addition of 1 equiv. TFA, scale of bar 10 μm.

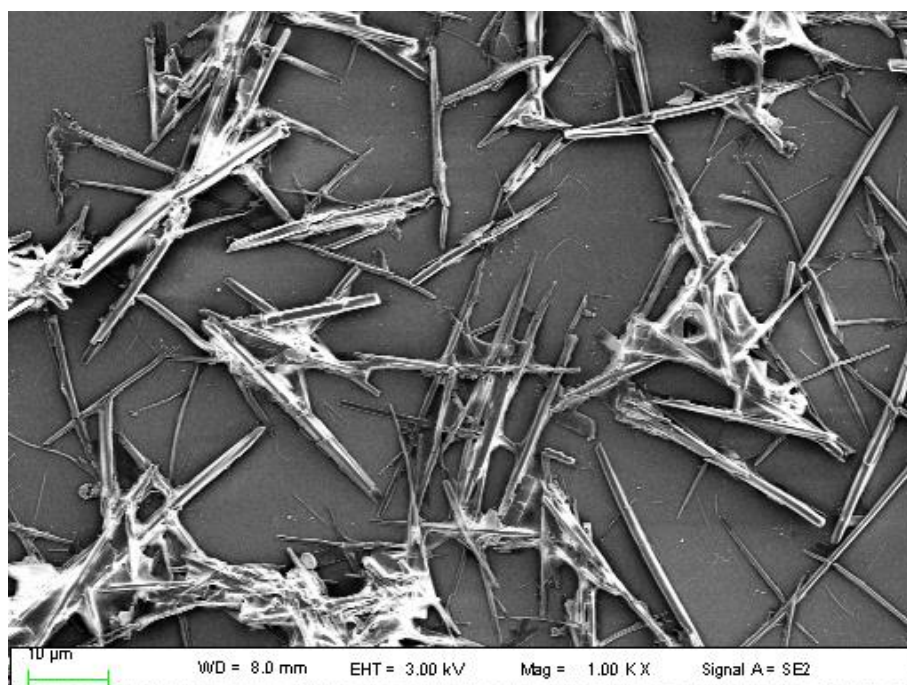

**Figure S34.** SEM image of sol (1.0 wt%) collapsed by metallo-hydrogel containing 5 equiv. *p*-DMAP and 5 equiv. TFA after the addition of 1 equiv. *p*-DMAP, scale of bar 10 μm.



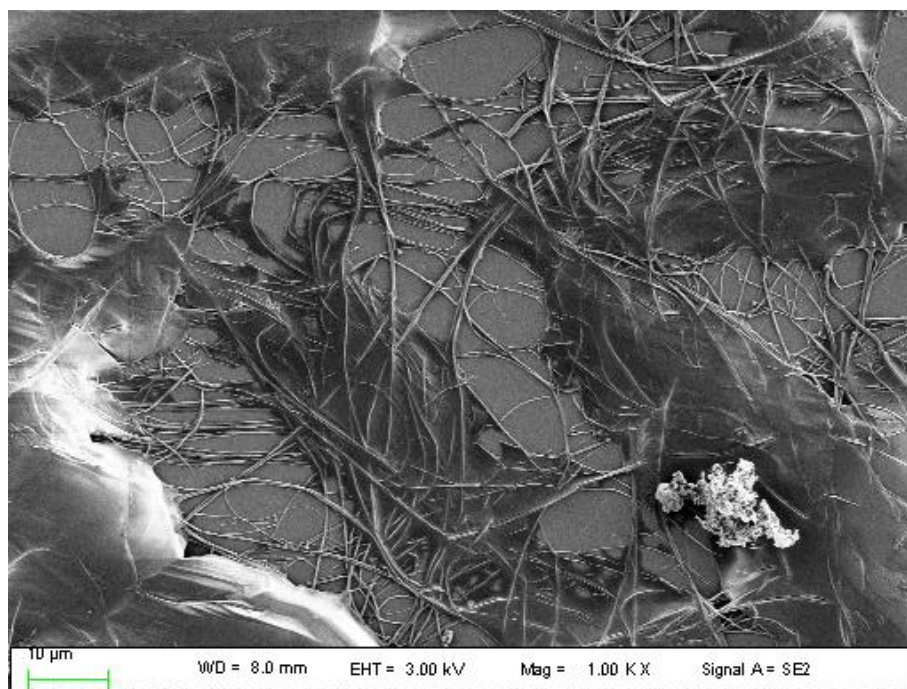

**Figure S35.** SEM image of metallo-hydrogel (1.0 wt%) reformed by collapsed sol **1a** in H<sub>2</sub>O containing 17 equiv. *p*-DMAP and 16 equiv. TFA after the addition of 1 equiv. TFA, scale of bar 10 μm.

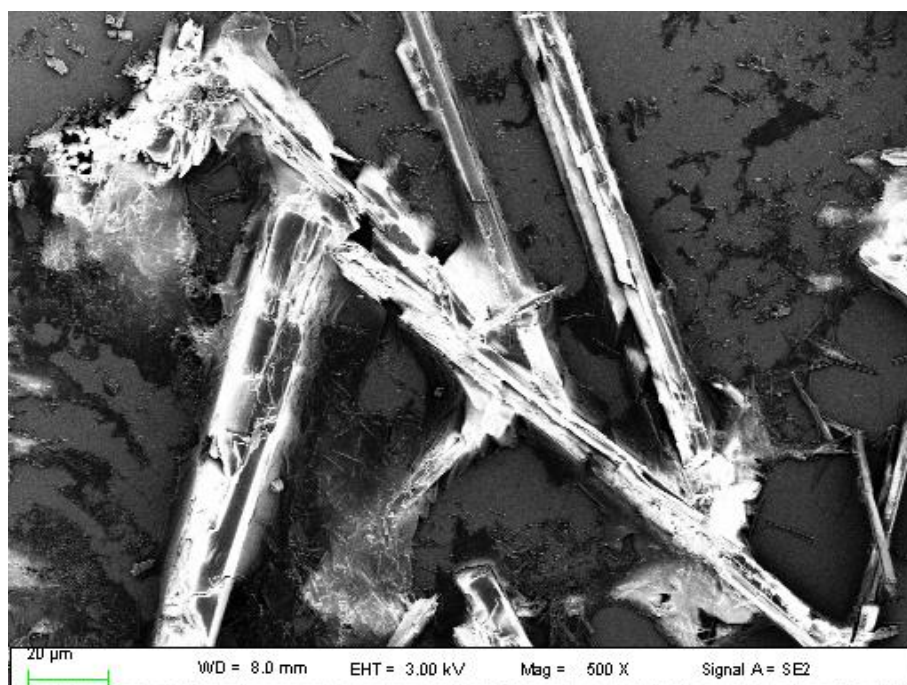

**Figure S36.** SEM image of sol (1.0 wt%) collapsed by metallo-hydrogel containing 17 equiv. *p*-DMAP and 17 equiv. TFA after the addition of 1 equiv. *p*-DMAP, scale of bar 20 μm.

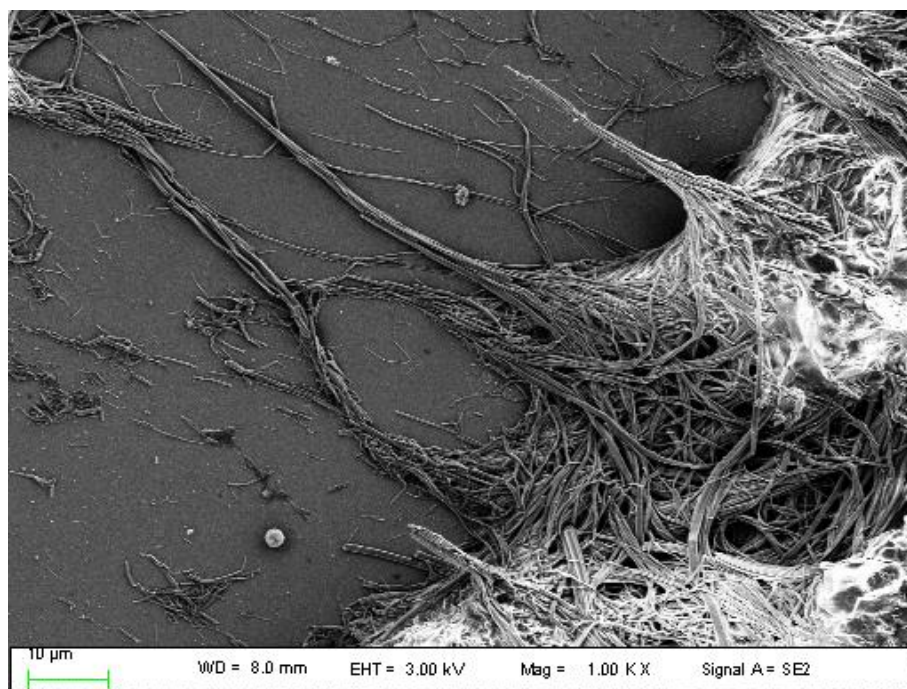

**Figure S37.** SEM image of metallo-hydrogel (1.0 wt%) reformed by collapsed sol **1a** in H<sub>2</sub>O containing 20 equiv. *p*-DMAP and 19 equiv. TFA after the addition of 1 equiv. TFA, scale of bar 10 μm.

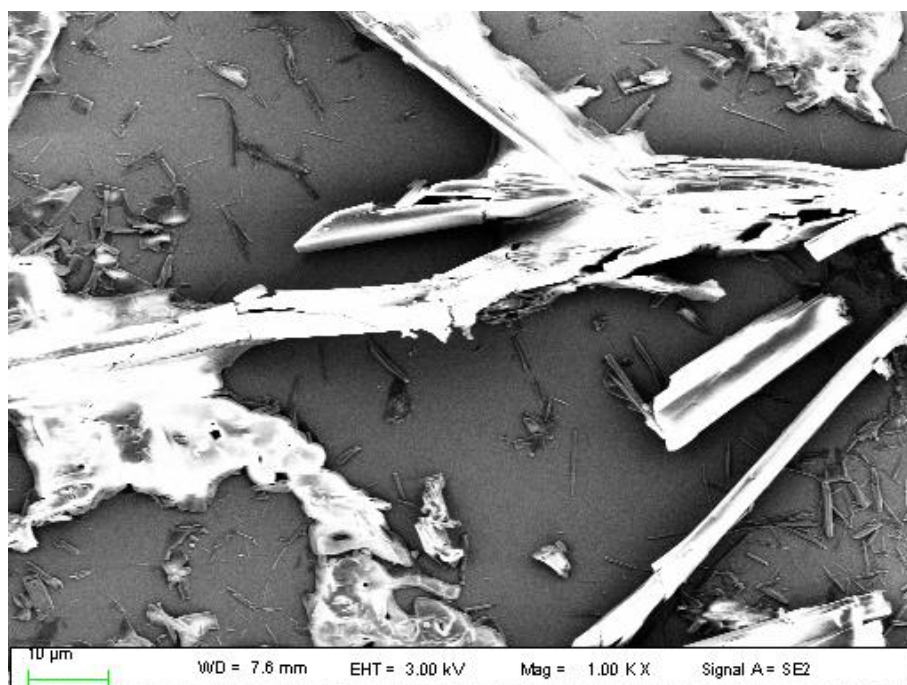

**Figure S38.** SEM image of sol (1.0 wt%) collapsed by metallo-hydrogel containing 20 equiv. *p*-DMAP and 20 equiv. TFA after the addition of 1 equiv. *p*-DMAP, scale of bar 10 μm.



## 24. $^1\text{H}$ NMR, $^{13}\text{C}$ NMR and ESI-MS spectra for important compounds.

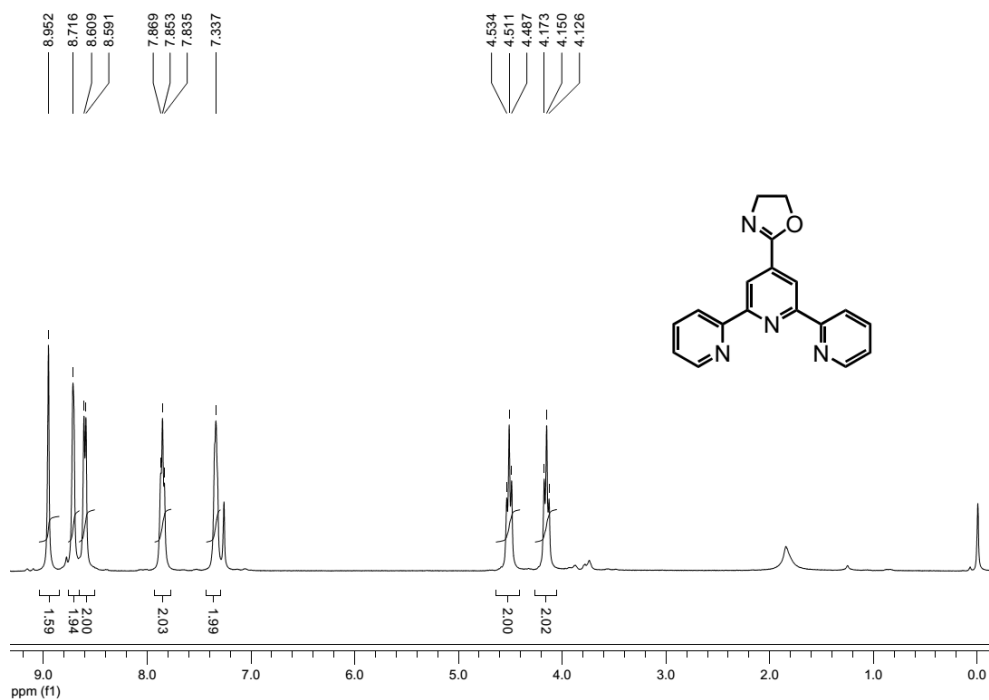

**Figure S39.**  $^1\text{H}$  NMR ( $\text{CDCl}_3$ , 400 MHz, 298 K) spectrum of ligand **S3**.

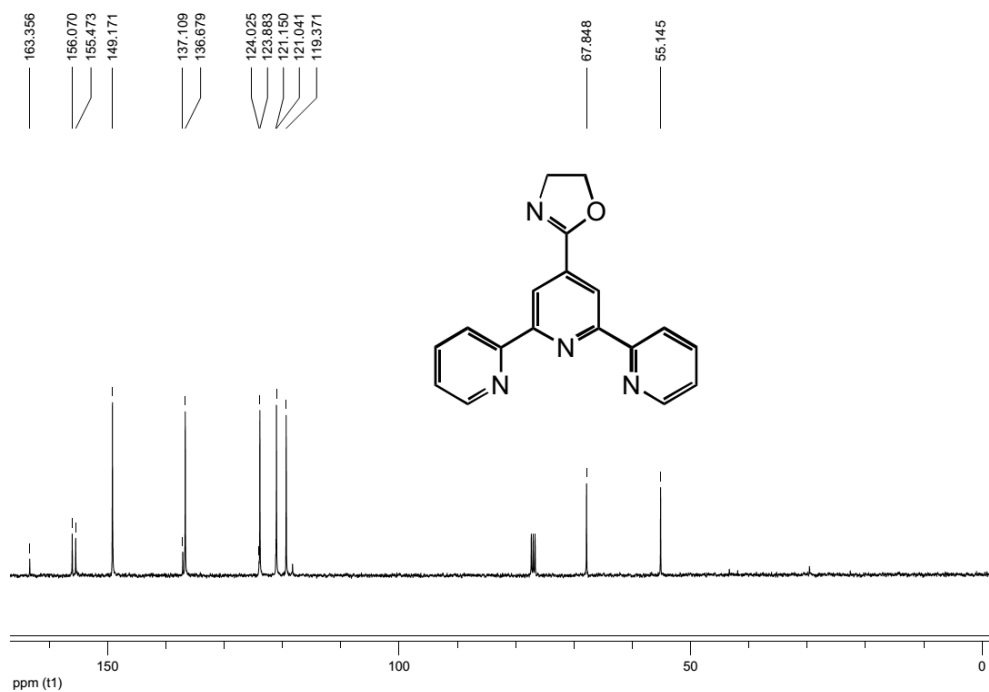

**Figure S40.**  $^{13}\text{C}$  NMR ( $\text{CDCl}_3$ , 100 MHz, 298 K) spectrum of ligand **S3**.

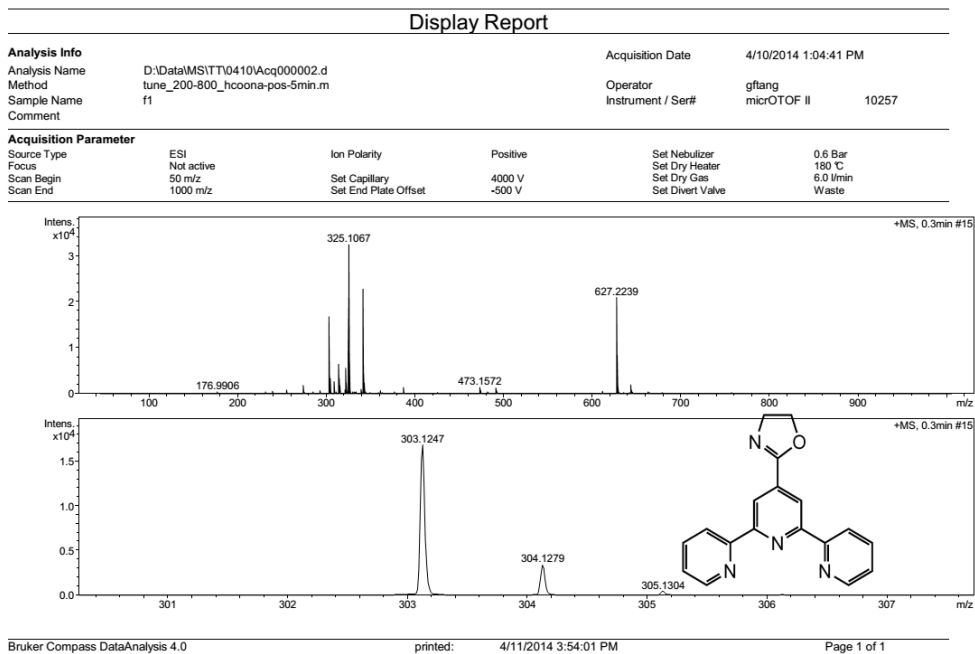

**Figure S41.** ESI-MS spectrum of ligand **S3**.

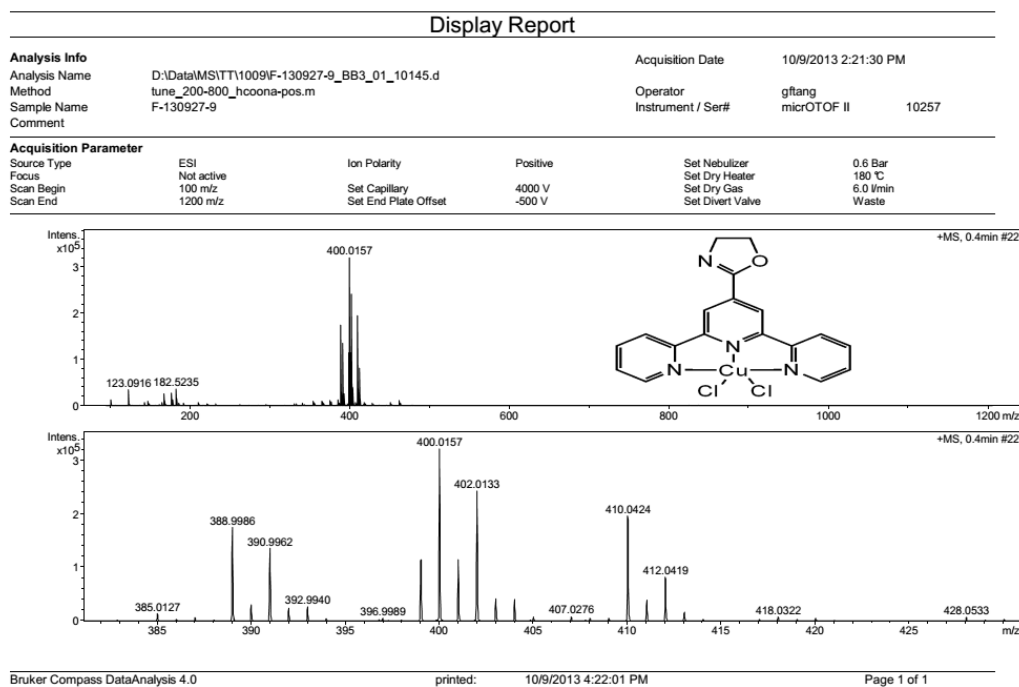

**Figure S42.** ESI-MS spectrum of ligand **3**.

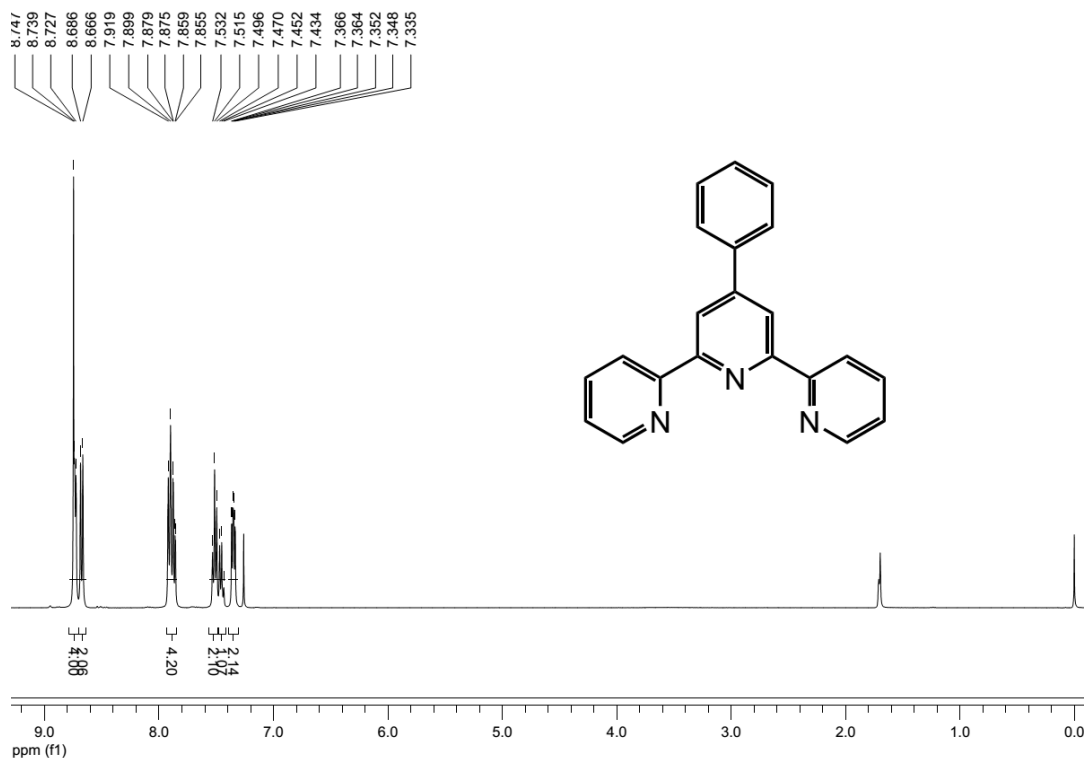

Figure S43.  $^1\text{H}$  NMR ( $\text{CDCl}_3$ , 400 MHz, 298 K) spectrum of ligand S4.

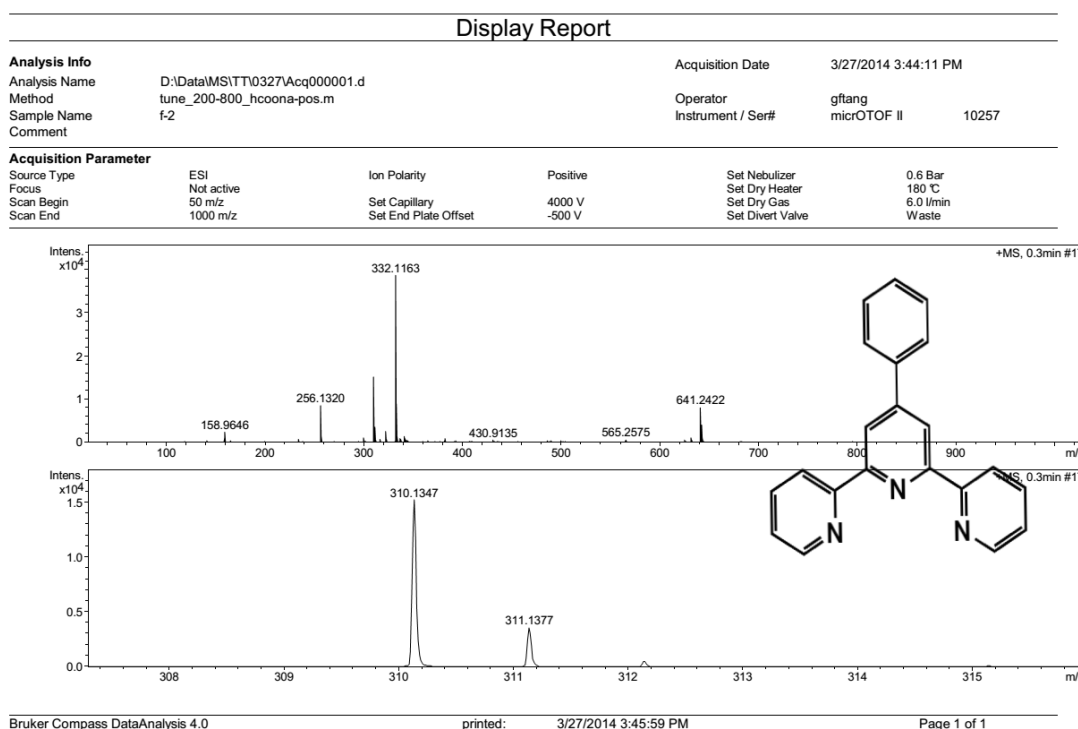

Figure S44. ESI-MS spectrum of ligand S4.

### Display Report

| Analysis Info         |                                               | Acquisition Date     |                   | 10/9/2013 2:12:24 PM |           |
|-----------------------|-----------------------------------------------|----------------------|-------------------|----------------------|-----------|
| Analysis Name         | D:\Data\MS\IT\1009\F-130927-10_BA6_01_10140.d | Operator             | gftang            |                      |           |
| Method                | tune_200-800_hcoona-pos.m                     | Instrument / Ser#    | microTOF II 10257 |                      |           |
| Sample Name           | F-130927-10                                   | Comment              |                   |                      |           |
| Acquisition Parameter |                                               |                      |                   |                      |           |
| Source Type           | ESI                                           | Ion Polarity         | Positive          | Set Nebulizer        | 0.6 Bar   |
| Focus                 | Not active                                    | Set Capillary        | 4000 V            | Set Dry Heater       | 180 °C    |
| Scan Begin            | 100 m/z                                       | Set End Plate Offset | -500 V            | Set Dry Gas          | 6.0 l/min |
| Scan End              | 1200 m/z                                      |                      |                   | Set Divert Valve     | Waste     |

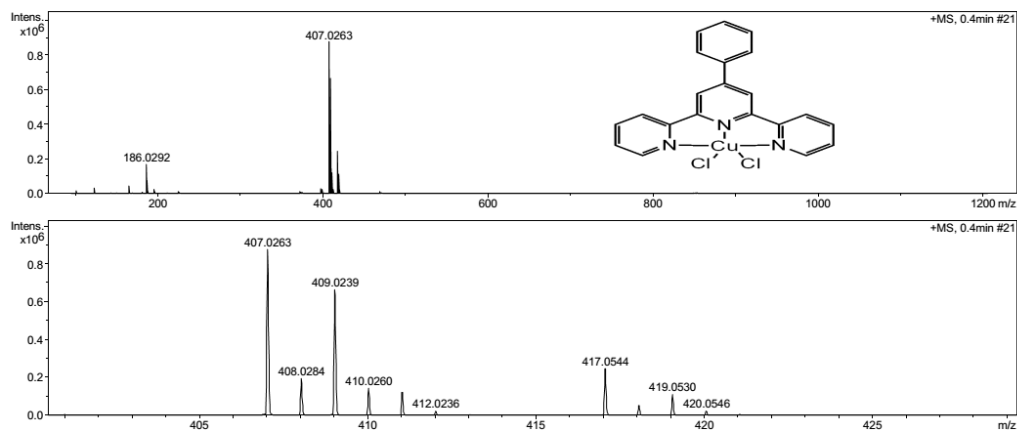

Bruker Compass DataAnalysis 4.0 printed: 10/9/2013 4:22:12 PM Page 1 of 1

**Figure S45.** ESI-MS spectrum of complex 4.

### Display Report

| Analysis Info         |                                               | Acquisition Date     |                   | 10/9/2013 2:19:41 PM |           |
|-----------------------|-----------------------------------------------|----------------------|-------------------|----------------------|-----------|
| Analysis Name         | D:\Data\MS\IT\1009\F-130927-11_BB2_01_10144.d | Operator             | gftang            |                      |           |
| Method                | tune_200-800_hcoona-pos.m                     | Instrument / Ser#    | microTOF II 10257 |                      |           |
| Sample Name           | F-130927-11                                   | Comment              |                   |                      |           |
| Acquisition Parameter |                                               |                      |                   |                      |           |
| Source Type           | ESI                                           | Ion Polarity         | Positive          | Set Nebulizer        | 0.6 Bar   |
| Focus                 | Not active                                    | Set Capillary        | 4000 V            | Set Dry Heater       | 180 °C    |
| Scan Begin            | 100 m/z                                       | Set End Plate Offset | -500 V            | Set Dry Gas          | 6.0 l/min |
| Scan End              | 1200 m/z                                      |                      |                   | Set Divert Valve     | Waste     |

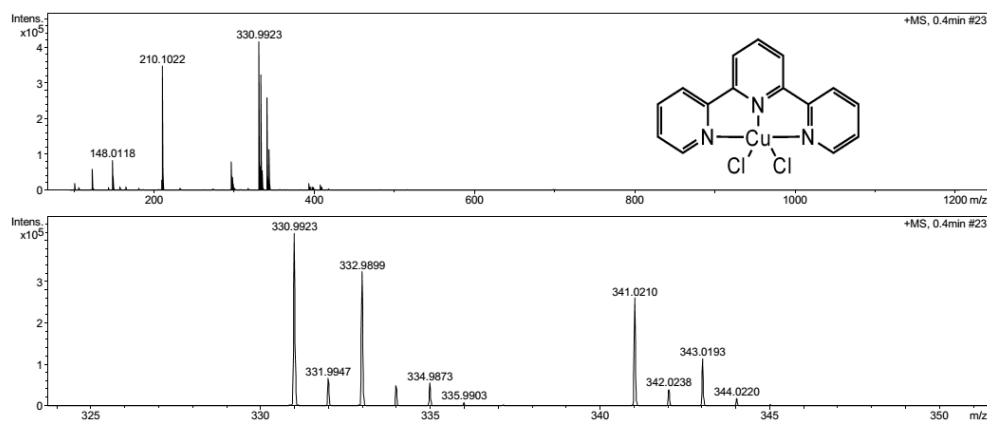

Bruker Compass DataAnalysis 4.0 printed: 10/9/2013 4:22:25 PM Page 1 of 1

**Figure S46.** ESI-MS spectrum of complex 5.

### Display Report

|                      |                                       |                   |                      |
|----------------------|---------------------------------------|-------------------|----------------------|
| <b>Analysis Info</b> |                                       | Acquisition Date  | 3/27/2014 1:06:13 PM |
| Analysis Name        | D:\Data\MS\IT\0327\F-6_RD6_01_12971.d | Operator          | gftang               |
| Method               | tune_200-800_hcoona-pos.m             | Instrument / Ser# | micrOTOF II 10257    |
| Sample Name          | f-6                                   |                   |                      |
| Comment              |                                       |                   |                      |

|                              |            |                      |          |                  |           |
|------------------------------|------------|----------------------|----------|------------------|-----------|
| <b>Acquisition Parameter</b> |            |                      |          |                  |           |
| Source Type                  | ESI        | Ion Polarity         | Positive | Set Nebulizer    | 0.6 Bar   |
| Focus                        | Not active | Set Capillary        | 4000 V   | Set Dry Heater   | 180 °C    |
| Scan Begin                   | 50 m/z     | Set End Plate Offset | -500 V   | Set Dry Gas      | 6.0 l/min |
| Scan End                     | 1000 m/z   |                      |          | Set Divert Valve | Waste     |

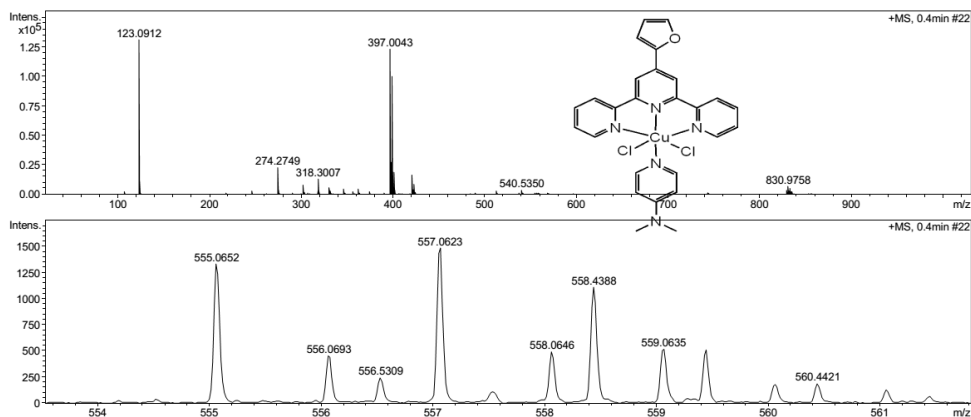

Bruker Compass DataAnalysis 4.0 printed: 3/27/2014 1:08:35 PM Page 1 of 1

**Figure S47.** ESI-MS spectrum of complex **6a**.

### Display Report

|                      |                                               |                   |                      |
|----------------------|-----------------------------------------------|-------------------|----------------------|
| <b>Analysis Info</b> |                                               | Acquisition Date  | 10/9/2013 2:06:58 PM |
| Analysis Name        | D:\Data\MS\IT\11009\F-130927-4_BA3_01_10137.d | Operator          | gftang               |
| Method               | tune_200-800_hcoona-pos.m                     | Instrument / Ser# | micrOTOF II 10257    |
| Sample Name          | F-130927-4                                    |                   |                      |
| Comment              |                                               |                   |                      |

|                              |            |                      |          |                  |           |
|------------------------------|------------|----------------------|----------|------------------|-----------|
| <b>Acquisition Parameter</b> |            |                      |          |                  |           |
| Source Type                  | ESI        | Ion Polarity         | Positive | Set Nebulizer    | 0.6 Bar   |
| Focus                        | Not active | Set Capillary        | 4000 V   | Set Dry Heater   | 180 °C    |
| Scan Begin                   | 100 m/z    | Set End Plate Offset | -500 V   | Set Dry Gas      | 6.0 l/min |
| Scan End                     | 1200 m/z   |                      |          | Set Divert Valve | Waste     |

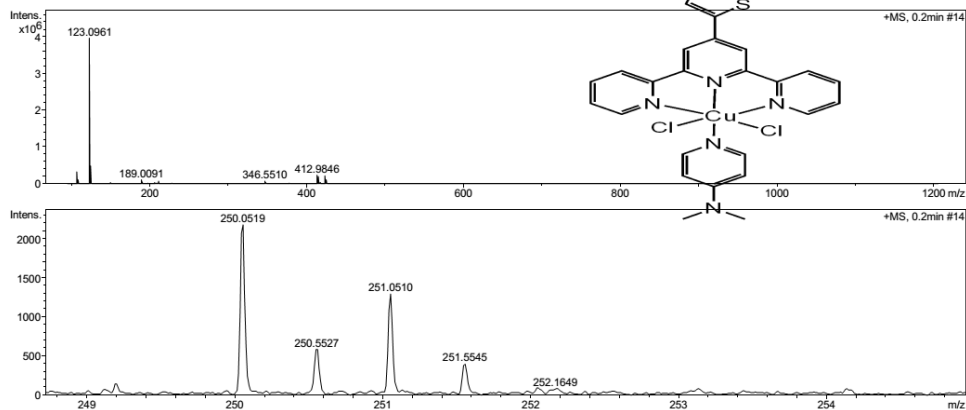

Bruker Compass DataAnalysis 4.0 printed: 11/13/2013 3:07:28 PM Page 1 of 1

**Figure S48.** ESI-MS spectrum of complex **7**.

## Display Report

|                              |                                              |                      |                      |                  |           |
|------------------------------|----------------------------------------------|----------------------|----------------------|------------------|-----------|
| <b>Analysis Info</b>         |                                              | Acquisition Date     | 10/9/2013 2:16:02 PM |                  |           |
| Analysis Name                | D:\Data\MS\TT1009\F-130927-12_BA8_01_10142.d | Operator             | gflang               |                  |           |
| Method                       | tune_200-800_hcoona-pos.m                    | Instrument / Ser#    | micrOTOF II 10257    |                  |           |
| Sample Name                  | F-130927-12                                  | Comment              |                      |                  |           |
| <b>Acquisition Parameter</b> |                                              |                      |                      |                  |           |
| Source Type                  | ESI                                          | Ion Polarity         | Positive             | Set Nebulizer    | 0.6 Bar   |
| Focus                        | Not active                                   | Set Capillary        | 4000 V               | Set Dry Heater   | 180 °C    |
| Scan Begin                   | 100 m/z                                      | Set End Plate Offset | -500 V               | Set Dry Gas      | 6.0 l/min |
| Scan End                     | 1200 m/z                                     |                      |                      | Set Divert Valve | Waste     |

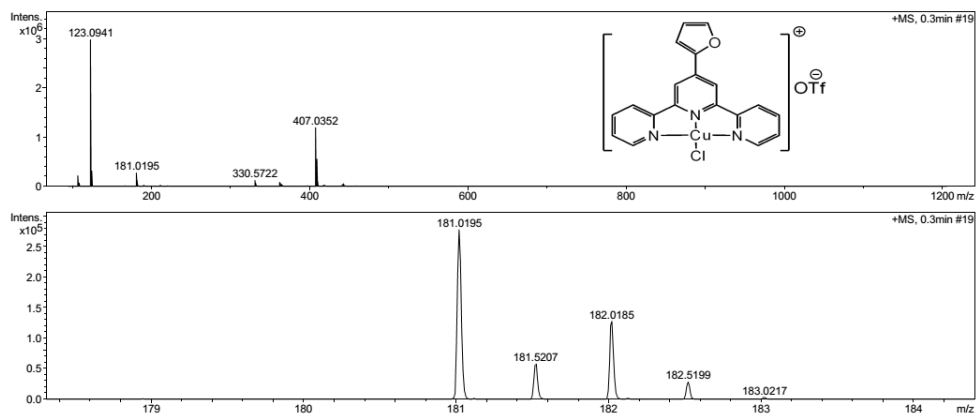

**Figure S49.** ESI-MS spectrum of complex **10**.

## 25. References

1. W. Fang, Z. Sun and T. Tu, *J. Phys. Chem. C*, 2013, **117**, 25185.
2. Bruker, Analytical X-ray System. SAINT+ programs, Release Version 6.02, (1999).
3. Sheldrick, G. M. SHELXS-97, a program for the solution of crystal structures. SHELXL-97, a program for crystal structure refinement University of Göttingen: Göttingen, Germany, (1997).
4. F. Ito, T. Nakamura, S. Yorita, H. Danjo and K. Yamaguchi, *Tetrahedron Lett.*, 2009, **50**, 6252.
5. D. P. Harrison, A. M. Lapides, R. A. Binstead, J. J. Concepcion, M. A. Méndez, D. A. Torelli, J. L. Templeton and T. J. Meyer, *Inorg. Chem.*, 2013, **52**, 4747.
6. N. A. Caballero, F. J. Melendez, C. Muñoz-Caro and A. Niño, *Biophys. Chem.*, 2006, **124**, 155.
7. C. Öğretir, D. Özögüt, S. Yarligan and T. Arslan, *J. Mol. Struc-THEOCHEM*, 2006, **759**, 73.
8. P. Forsythe, R. Frampton, C. D. Johnson and A. R. Katritzky, *J. Chem. Soc., Perkin Trans*, 1972, **2**, 671.
9. A. Bryson, *J. Am. Chem. Soc.*, 1960, **82**, 4871.
10. A. Gero and J. J. Markham, *J. Org. Chem.*, 1951, **16**, 1835.
11. H. I. Ogawa, K. Sakata, S.-Y. Liu, H. Mino, S. Tsuruta and Y. Kato, *Jpn. J. Genet.*, 1987, **62**, 485.
12. A. R. Osborn and K. Schofield, *J. Chem. Soc.*, 1956, 4191.
13. E. A. Castro and C. Ureta, *J. Org. Chem.*, 1989, **54**, 2153.
